# Supplementary material for: Personalized Deep Brain Stimulation: AI-Driven Fusion of Multi-Modal Imaging and Finite Element Analysis for Predictive Electrode Field Modeling
Source: Research Square preprint supplement (doi:10.21203/rs.3.rs-7288430/v1), 2025-08-07
Supplement: Supplementary file 1 [file 13c8f06e9cffef2e72d46b3b.xlsx]

## Sheet: Sheet1
	Focus	Pre/Post-operative Dyskinesia	Pre/Post-operative Freezing	Pre/Post-operative Prominent Axial Symptoms	Pre/Post-operative RBD	Pre/Post-operative Cognitive Decline	Pre/Post-operative Hallucinations	Pre/Post-operative Mood Disorder	Preoperative assessment does not recommend surgery	Planned postoperative electrophysiology collection	Positive genetic testing	Special electrode target or programming parameters	Special DBS indications other than PD
	Follow-up admission time window: within 1 week before and after 1 month after surgery, within 1 week before and after 2 months after surgery, within 2 weeks before and after half a year after surgery, within 1 month before and after 1 year after surgery, within 3 months before and after 2 years after surgery, > within half a year before and after 2 years after surgery
																						C(Jing Yu)	0	1	2	3	4	5	6	7					C(Jing Yu)	8	9	10	11	12	13	14	15
HS Number	ID	Name	Power on & Adjust Date	Gender	Age	Indication	Disease Duration (Years)	Permanent residence	Surgery Date	Main issues before booting/tuning	Focus	Preoperative assessment (with/without）	Preoperative FDG (Yes/No)	Follow-up level	Phone	Time for next follow-up	Take daily medication before turning on/adjusting	Take medication daily after turning on/adjusting	Equipment specifications	Electrode target	Adjustment remarks	C(Medtronic)	0	1	2	3					Frequency Hz	Pulse width PW	Amplitude Amplifier (default V, mA needs to be noted)	Resistance Ω	C(Medtronic)	8	9	10	11					Frequency Hz	Pulse width PW	Amplitude Amplifier (default V, mA needs to be noted)	ResistanceΩ	Remarks and explanation of abnormal conditions
																						C(Pinchi)	1	2	3	4									C(Pinchi)	5	6	7	8
																						C(Jing Yu)	0	1	2	3									C(Jing Yu)	4	5	6	7
No	DBS2023020601	Xiong Yiyun	2023-02-06	Male	58	PD	18	Hunan	2023-01-16	Right side tremor, slow; left side of the trunk; Slurred words	Abnormal movements (right lower extremity); freezing； RBD；		No	Level 3		2024-01-01	Medopa 1/2-1/2-1/2, Diphenhexol 1/2-0-1/2, Amantadine 1-1-0; Teshuda 1-1-1	Medopa 1/4-1/4-1/4, Diphenhexol 1/2-0-1/2, Amantadine 1/2-1/2-0, Teshuda 1-1-1	jingyu1200-40 Lead；SR1101	STN	monopole	C+			2-						130	60	1.5	1360	C+			6-						130	60	1.6	1320
No	DBS2023020602	Li Jixiu	2023-02-06	Female	59	PD	10	Chengdu	2023-01-09	Right-sided tremor, abnormalities	Abnormalities (both lower limbs); freezing	No	No	Level 3		2024-01-01	Medopa 3/4-3/4-3/4-3/4, Kodan 1/2-1/2-1/2-1/2-1/2, Taxuda 1/2-1/2-1/2-1/2, Quetiapine (25 mg) 0-0-0-1	Medoba 1/2-1/2-1/2-1/2; Taishuda 1-1; Quetiapine (25mg) 0-0-0-1/2	jingyu1200-40 Lead；SR1101	STN	cross	C+		1-							110	60	1.5	1480	C+			6-						110	60	1.6	1660
No	DBS2023020602	Li Jixiu	2023-02-06	Female	59	PD	10	Chengdu	2023-01-09	Right-sided tremor, abnormalities	Abnormalities (both lower limbs); freezing	No	No	Level 3		2024-01-01	Medopa 3/4-3/4-3/4-3/4, Kodan 1/2-1/2-1/2-1/2-1/2, Taxuda 1/2-1/2-1/2-1/2, Quetiapine (25 mg) 0-0-0-1	Medoba 1/2-1/2-1/2-1/2; Taishuda 1-1; Quetiapine (25mg) 0-0-0-1/2	jingyu1200-40 Lead；SR1101	STN	cross	C+				3-					110	60	1.2
HS20161026013	DBS2022071301	Li Ming	2023-02-07	Male	37	PD	19	Shanghai	2023-01-04	Abnormal movement on the left side, slow stiffness	Variation; Freezing	Yes	Yes	Level 1		2023-03-01	Ratary（195）1-1-1; Ratatry（145）0-0-0-1; Rotigotine (4mg) 1-0-0; Senforol (0.75mg) 1-0-1; Amantadine 1-1-1; Diphenhexol 1-1-1	Ratary（195）1-0-1； Rotigotine (4mg) 1; Amantadine 1-1-0; Diphenhexol 1/2-1/2-1/2	Pingchi.1200-40 Lead；SR1101	STN	monopoleG1	C+		2-							130	60	1.7	942	C+			7-						130	60	1.5	893	EOPD, gene (-);
HS20161026013	DBS2022071301	Li Ming	2023-02-07	Male	37	PD	19	Shanghai	2023-01-04	Abnormal movement on the left side, slow stiffness	Variation; Freezing	Yes	Yes	Level 1		2023-03-01	Ratary（195）1-1-1; Ratatry（145）0-0-0-1; Rotigotine (4mg) 1-0-0; Senforol (0.75mg) 1-0-1; Amantadine 1-1-1; Diphenhexol 1-1-1	Ratary（195）1-0-1； Rotigotine (4mg) 1; Amantadine 1-1-0; Diphenhexol 1/2-1/2-1/2	Pingchi.1200-40 Lead；SR1101	STN	monopoleG2	C+			3-						130	60	1.2	984	C+			7-						130	60	1.5	893	D1 parameter, anti-abnormal movement + minimal improvement in slow stiffness
HS20220714002	DBS2023020301	Zhang Xiaoqing	2023-02-03	Female	69	PD	12	Shanghai	2022-06-21	After the new crown, the gait impairment has worsened, and it has been improved before the program control	freezing，poor balance, preoperative hallucinations, RBD, depression	Yes	Yes	Level 1	13761571178	2023-06-20	Medopa 1/2-1/2-1/2; Amantadine 1-1-1	Medopa 1/2-1/2-1/2; Amantadine 1-1-1	Pingchi.1200-40 Lead；SR1101	STN	cross	C+	1-	2-							80	60	2.4	844	C+	5-	6-							80	60	2.5	785
HS20220714002	DBS2023020301	Zhang Xiaoqing	2023-02-03	Female	69	PD	12	Shanghai	2022-06-21	After the new crown, the gait impairment has worsened, and it has been improved before the program control	freezing，poor balance, preoperative hallucinations, RBD, depression	Yes	Yes	Level 1	13761571178	2023-06-20	Medopa 1/2-1/2-1/2; Amantadine 1-1-1	Medopa 1/2-1/2-1/2; Amantadine 1-1-1	Pingchi.1200-40 Lead；SR1101	STN	cross	C+		2-		4-					80	80	1.6	1.6	C+		6-		8-					80	60	1.3	679
HS20220714002	DBS2023020301	Zhang Xiaoqing	2022-09-03	Female	69	PD	12	Shanghai	2022-06-21	Stiff, frozen	freezing，poor balance, preoperative hallucinations, RBD, depression	Yes	Yes	Level 1	13761571178	2023-06-20	Medopa 1/2-1/2-1/2; Amantadine 1-1-1	Medopa 1/2-1/2-1/2; Amantadine 1-1-1	Pingchi.1200-40 Lead；SR1101	STN	Double negative	C+	1-	2-							110	90	2.4		C+	5-	6-							110	90	2.2		Medication effect lasts 90 minutes
HS20220714002	DBS2023020301	Zhang Xiaoqing	2022-09-08	Female	69	PD	12	Shanghai	2022-06-21	Stiffness, freezing, short medication, biphasic dysphasia	freezing，poor balance, preoperative hallucinations, RBD, depression	Yes	Yes	Level 1	13761571178	2023-06-20	Medopa 1/2-1/2-1/2; Amantadine 1-1-1	Medopa 1/2-1/2-1/2; Amantadine 1-1-1	Pingchi.1200-40 Lead；SR1101	STN	cross	C+	1-	2-							80	60	2.3		C+	5-	6-							80	60	2.5	785	After programming, medication effect > 5 hours
HS20220714002	DBS2023020301	Zhang Xiaoqing	2022-09-08	Female	69	PD	12	Shanghai	2022-06-21	Stiffness, freezing, short medication, biphasic dysphasia	freezing，poor balance, preoperative hallucinations, RBD, depression	Yes	Yes	Level 1	13761571178	2023-06-20	Medopa 1/2-1/2-1/2; Amantadine 1-1-1	Medopa 1/2-1/2-1/2; Amantadine 1-1-1	Pingchi.1200-40 Lead；SR1101	STN	cross	C+		2-		4-					80	80	1.5		C+		6-		8-					80	90	1.3	679
HS20220714002	DBS2023020301	Zhang Xiaoqing	2022-07-19	Female	69	PD	12	Shanghai	2022-06-21	Stiff, frozen	freezing，poor balance, preoperative hallucinations, RBD, depression	Yes	Yes	Level 1	13761571178	2023-06-20	Medopa 1/2-1/2-1/2; Amantadine 1-1-1	Medopa 1/2-1/2-1/2; Amantadine 1-1-1	Pingchi.1200-40 Lead；SR1101	STN	monopole	C+		2-							130	90	2		C+		6-							130	90	2
	DBS2023022001	Liu Haonian	2023-02-07	Male	63	PD	16	Xinjiang	2019-12-23	Freeze, abnormal movement, articulation, gait	Walking instability after surgery	Yes	Yes	Level 2		2025-02-07	Medoba 1/4-1/4-1/4-1/4-1/4	Medopa 1/4-1/4-1/4-1/4, amantadine 1/2-0-1/2, and donepezil 5 mg qn	Pingchi.1200-40 Lead；SR1101	STN	cross	C+	2-								VFS	80	3.4mA		C+		6-							VFS	70	3.5mA
	DBS2023022001	Liu Haonian	2023-02-07	Male	63	PD	16	Xinjiang	2019-12-23	Freeze, abnormal movement, articulation, gait	Walking instability after surgery	Yes	Yes	Level 2		2025-02-07	Medoba 1/4-1/4-1/4-1/4-1/4	Medopa 1/4-1/4-1/4-1/4, amantadine 1/2-0-1/2, and donepezil 5 mg qn	Pingchi.1200-40 Lead；SR1101	STN	cross	C+				4-					VFS	60	3mA		C+				8-					VFS	60	2.9mA
	DBS2023020601	Feng Jihua	2023-02-06	Male	40	PD	5		2023-01-13	Tremor, slow		Yes	No	Level 2		2024-02-06	Medoba 1-1-1; Diphenhexol 1-1-1	Medopa 1/2-1/2-1/2; Diphenhexol 1-0-1	Pingchi.1200-40 Lead；SR1101	STN	monopole	C+			3-						130	60	2	1227	C+			7-						130	60	2	1454	Uncle PD, gene not tested
	DBS2023011101	Deng Conghui	2023-02-14	Female	45	PD	12		2023-01-16	Stiff, shaking	During procedural control, the right lower extremity was abnormal and freezing	Yes	No	Level 3		2024-02-14	Medopa 3/4-3/4-3/4; Diphenhexol 1-1-1; Pramipexole (0.25mg) 1-1-1	Medopa 1/2-1/2-1/2; Diphenhexol 1/2-0-1/2	Pingchi.1200-40 Lead；SR1101	STN	monopole	C+			3-						140	60	1.7		C+			7-						140	60	2
	DBS2022092601	Zhou army	2023-02-16	Male	17	dystonia	0.6		2022-09-26	Dystonia, left ankylotony	Special targets, special genes	No	No	No			Baclofen 1/2-1/2-1/2;	Baclofen 1/2-1/2-1/2;	Medtronic, 3389S, RC	PF-CM	monopole(before adjustment)	C+	1-	2-							130	90	2.6	646	C+	8-	9-							130	70	1.7	640	Xuanwu patient, no follow-up required
	DBS2022092601	Zhou army	2023-02-16	Male	17	dystonia	0.6		2022-09-26	Dystonia, left ankylotony	Special targets, special genes	No	No	No			Baclofen 1/2-1/2-1/2;	Baclofen 1/2-1/2-1/2;	Medtronic, 3389S, RC	PF-CM	monopole(After adjustment)	C+	1-	2-							150	90	2	637	C+	8-	9-							150	80	1.8	639	ATP1A3
	DBS2020120901	Yang Qinying	2023-02-10	Female	53	Meige	17		2020-12-09	Right eye twitching + difficulty opening the eye	tonic>phasic; Slurred speech, unsteady walking, and involuntary shaking	No	No	No			No	No	Pingchi.1200-40 Lead；SR1101	STN	monopole(before adjustment)	C+				4-					160	90	1.65		C+			7-						160	60	1.95
	DBS2020120901	Yang Qinying	2023-02-10	Female	53	Meige	17		2020-12-09	Right eye twitching + difficulty opening the eye	tonic>phasic; Slurred speech, unsteady walking, and involuntary shaking	No	No	No			No	No	Pingchi.1200-40 Lead；SR1101	STN	monopole(After adjustment)	C+				4-					130	120	2.5		C+			7-						130	100	2.2		D4 improved by >50% compared to before
	DBS2023011001	Zhang Weijun	2023-02-13	Male	64	PD	10		2023-01-12	Trembling in the left upper limb, slow		No	No	Level 3		2024-01-12	Medopa 1/2-1/2-1/2; Senforol (0.25mg) 1/2-1/2-0	Medoba 1/2-1/4-1/2	Medtronic, 3389S, RC	STN	monopole	C+		1-							130	60	1.5		C+		9-							130	60	1.5
	DBS2023020201	Fang Yuzhen	2023-02-03	Female	70	PD	10	Shanghai	2022-09-01	Afternoon end of the dose, slow, right lower limb dragging	end of the dose Non-motor, excessive saliva	Yes	Yes	Level 1		2023-10-01	Medopa 1/2-1/2-1/2-1/2, Amantadine 0-1/2-0, Teshuda 0-0-1; Clonazepam 0-0-1/4	Medopa 1/2-1/2-1/2-1/2; Amantadine 0-1/2-0; Tashuda 0-1-0; Clonazepam 0-0-1/4	Pingchi.1200-40 Lead；SR1101	STN	cross	C+		2-							100	60	2		C+		6-							100	70	3		D2 increases dorsolateral contact, lower limb stride improvement
	DBS2023020201	Fang Yuzhen	2023-02-03	Female	70	PD	10	Shanghai	2022-09-01	Afternoon end of the dose, slow, right lower limb dragging	end of the dose Non-motor, excessive saliva	Yes	Yes	Level 1		2023-10-01	Medopa 1/2-1/2-1/2-1/2, Amantadine 0-1/2-0, Teshuda 0-0-1; Clonazepam 0-0-1/4	Medopa 1/2-1/2-1/2-1/2; Amantadine 0-1/2-0; Tashuda 0-1-0; Clonazepam 0-0-1/4	Pingchi.1200-40 Lead；SR1101	STN	cross	C+			3-						100	70	2.25		C+			7-						100	70	1.8		Still 'end of the dose' effect
	DBS2023020201	Fang Yuzhen	2023-02-02	Female	70	PD	10	Shanghai	2022-09-01	Afternoon end of the dose, slow, right lower limb dragging	end of the dose Non-motor, excessive saliva	Yes	Yes	Level 1		2023-10-01	Medopa 1/2-1/2-1/2-1/2, Amantadine 0-1/2-0, Teshuda 0-0-1; Clonazepam 0-0-1/4	Medopa 1/2-1/2-1/2-1/2; Amantadine 0-1/2-0; Tashuda 0-1-0; Clonazepam 0-0-1/4	Pingchi.1200-40 Lead；SR1101	STN	monopole	C+		2-							80	60	2.4		C+		6-							80	60	2.8		D1
	DBS2023020201	Fang Yuzhen	2023-01-17	Female	70	PD	10	Shanghai	2022-09-01	Afternoon end of the dose, slow, right lower limb dragging	end of the dose Non-motor, excessive saliva	Yes	Yes	Level 1		2023-10-01	Medopa 1/2-1/2-1/2-1/2, Amantadine 0-1/2-0, Teshuda 0-0-1; Clonazepam 0-0-1/4	Medopa 1/2-1/2-1/2-1/2; Amantadine 0-1/2-0; Tashuda 0-1-0; Clonazepam 0-0-1/4	Pingchi.1200-40 Lead；SR1101	STN	cross	C+	1-	2-							65	60	2		C+	5-	6-							65	80	2.6		Immediate post-programming and the day after, slow rigidity and gait improved well
	DBS2023020201	Fang Yuzhen	2023-01-17	Female	70	PD	10	Shanghai	2022-09-01	Afternoon end of the dose, slow, right lower limb dragging	end of the dose Non-motor, excessive saliva	Yes	Yes	Level 1		2023-10-01	Medopa 1/2-1/2-1/2-1/2, Amantadine 0-1/2-0, Teshuda 0-0-1; Clonazepam 0-0-1/4	Medopa 1/2-1/2-1/2-1/2; Amantadine 0-1/2-0; Tashuda 0-1-0; Clonazepam 0-0-1/4	Pingchi.1200-40 Lead；SR1101	STN	cross	C+		2-		4-					65	60	2.4		C+		6-		8-					65	80	2.1
	DBS2023020201	Fang Yuzhen	2023-01-13	Female	70	PD	10	Shanghai	2022-09-01	Afternoon end of the dose, slow, right lower limb dragging	end of the dose Non-motor, excessive saliva	Yes	Yes	Level 1		2023-10-01	Medopa 1/2-1/2-1/2-1/2, Amantadine 0-1/2-0, Teshuda 0-0-1; Clonazepam 0-0-1/4	Medopa 1/2-1/2-1/2-1/2; Amantadine 0-1/2-0; Tashuda 0-1-0; Clonazepam 0-0-1/4	Pingchi.1200-40 Lead；SR1101	STN	cross	C+		2-							125	80	2.1		C+		6-							125	90	2.6		Immediate post-programming and the day after, slow rigidity
	DBS2023020201	Fang Yuzhen	2023-01-13	Female	70	PD	10	Shanghai	2022-09-01	Afternoon end of the dose, slow, right lower limb dragging	end of the dose Non-motor, excessive saliva	Yes	Yes	Level 1		2023-10-01	Medopa 1/2-1/2-1/2-1/2, Amantadine 0-1/2-0, Teshuda 0-0-1; Clonazepam 0-0-1/4	Medopa 1/2-1/2-1/2-1/2; Amantadine 0-1/2-0; Tashuda 0-1-0; Clonazepam 0-0-1/4	Pingchi.1200-40 Lead；SR1101	STN	cross	C+			3-						125	60	2.45		C+			7-						125	80	2.5
	DBS2023022201	Zhang Chulian	2023-02-23	Female	48	dystonia	0.6	chekiang	2023-01-31	Posture left偏, left-sided torticollis, left lower limb stiffness	tonic>phasic; DorsalGpe	No	No	No		No	No	No	jingyu1200-40 Lead；SR1101	Gpi	monopole	C+		1-							130	60	2		C+		5-							130	80	3
	DBS2023012901	Wu Zhigao	2023-02-21	Male	81	PD	6	Shanghai	2023-01-30	Trembling on the left, slow	RBD	Yes	No	Level 3	18018820546	2024-01-30	Medoba 3/2-3/2-3/2	Medoba1/2-1/2-1/2	jingyu1200-40 Lead；SR1101	STN	monopole	C+		2-							160	60	2		C+		6-							160	60	2
	DBS2023013001	Weng Lingdi	2023-02-27	Female	62	PD	4	chekiang	2023-02-03	Slow, stiff, lower limb pain	end of the dose, pain	Yes	No	Level 2	17366690668	2024-02-03	Prapexor1-0-1	Medoba1/4-1/4-1/4-1/4；Slaiglan1-0-0	Pingchi.1200-40 Lead；SR1101	STN	monopole	C+			3-						130	30	1.5		C+		6-							130	60	1.4		Abnormal movement after turning on the second ventral contact on both sides
	DBS2021062801	Sun Wei	2023-02-28	Male	34	Acanthocytosis	10	Guizhou	2021-07-02	Involuntary twisting of head, neck, trunk, and limbs, agitated restlessness	Chorea, VPS13A mutation; Electrode 3387 dorsalGpe	No	No	Level 3		2023-07-02	None (self-discontinuation)	risperidone（2mg）1/2-0-1；diphenhydroxysol 1/2-0-1/2	Medtronic, 3387S, RC	GPi	Double negative	C+	0-			3-					120	60	2.2		C+	8-			11-					120	60	2.2		Double negative ventral, increased dyskinesia
	DBS2023022302	Ye Ping	2023-02-23	Female	54	dystonia	2	Hangzhou	2023-03-02	Left torticollis, orofacial and upper limb tics	Torticollis, phasic contraction of right trapezius muscle	Yes	No	Level 3		2024-02-23	Clonazepam 1mg qn	Clonazepam2mg qn	jingyu1200-40 Lead；SR1101	Gpi	monopole	C+	0-								130	80	2.0mA	360	C+	4-								130	80	1.0mA	400	Right trapezius > left trapezius, right sternocleidomastoid, phasic frequent
	DBS2023030701	Luo Huiqing	2023-03-07	Female		PD		Shanghai	2022-09-22	Freezing, slow on the right	Freezing	Yes	Yes	Level 1		2023-09-22	Medoba1/2-1/2-1/2, Daringfu1/2-1/2-1/2, diphenhydroxysol 1/2-0-1/2, amantadine1/2-1/2-0	Medoba1/2-1/2-1/2，diphenhydroxysol 1/2-0-0，amantadine1/2-0-0	Pingchi.1200-40 Lead；SR1101	STN	monopole	C+			3-						110	60	2.2		C+			7-						110	60	1.8		Stimulator rejection, replaced and reactivated
	DBS2023030701	Ye Xiaojiong	2023-03-07	Female	39	ET-plus	12	Shanghai	2023-02-02	Trembling, postural and kinetic	Trembling, tremor analysis	Yes	Yes	Level 1		2024-02-02	Levetiracetam 0.5g bid	Levetiracetam0.5g bid	jingyu1200-40 Lead；SR1101	VIM-PSA	monopole	C+	0-								160	60	1.5	1410	C+	4-								160	60	1.5	1610	Persistent improvement after DBS surgery, right upper limb can eat and drink after turning on, fine movements still difficult
	DBS2023030701	Chen Zhongmin	2023-03-07	Male	57	PD	4	Shaanxi	2023-02-06	Stiff, slow, end of the dose, left upper limb trembling	Poor balance, slow, stiff	Yes	No	Level 3		2024-02-06	Medoba2/3-2/3-2/3, Prapexor (0.25mg) 1-1-1	Medoba1/2-1/2-1/2，Amantane1/2-1/2-0	jingyu1200-40 Lead；SR1101	STN	monopole	C+		2-							130	60	1.4		C+			6-						130	60	2.2		6-contact 2.4V group left upper limb SID mild
	DBS2023030702	Zhang Shuihua	2023-03-07	Female	65	PD	10	Hangzhou	2023-02-07	Slow, stiff, freezing, bilateral lower limb weakness	Slow, stiff, freezing	Yes	Yes	Level 2	15258804810	2024-02-07	Medoba1-1-1-1, Xi Ning 0-0-1, Kedan1/2-1/2-1/2-1/2, Senforo (0.25mg) 2-2-2, Amantane 1-0-0, diphenhydroxysol 1/2-0-1/2	Medoba1/2-1/2-1/2-1/2，Amantane1-0-0，Donepezil0-0-5mg	Pingchi.1200-40 Lead；SR1101	STN	monopole	C+			3-						110	60	1.5	1096	C+			7-						110	60	1.5	942
	DBS2023030703	Wang Xueyi	2023-03-07	Male	77	PD	13	Shanghai	2023-02-08	Trembling, abnormal movement	Trembling, abnormal movement	Yes	Yes	Level 1		2024-02-08	Medoba3/4-3/4-3/4, Amantane1/2-0-1/2	Medoba1/2-1/2-1/2，Amantane0-1/2-0	Medtronic, 3389S, RC	STN	monopole	C+			2-						130	60	2		C+			10-						130	60	1.8		9-contact 1.5V has abnormal movement
	DBS2023030801	Sun Gongyang	2023-03-08	Male	58	PD	15	Hubei	2023-02-10	Slow, stiff, freezing, poor balance, RBD, end of the dose, depression	RBD, end of the dose; Postoperative agitated gait + hoarse voice	Yes	No	Level 3	15586396891	2024-02-10	Medoba3/4-3/4-3/4-3/4, Kedan1/2-1/2-1/2, Senforo (0.25mg) 2-2-2, Slaiglan 1-0-1	Medoba1/2-1/2-1/2-1/2，,Slaiglan0-1-0	Medtronic, 3389S, RC	STN	monopole	C+			2-						110	60	1.3		C+			10-						110	60	1.7
	DBS2023030802	Zhang Yu	2023-03-08	Male	66	PD	25		2023-02-08	Tremor, slow, stiff, dyskinesia	Tremor, slow, stiff, dyskinesia	Yes	Yes	Level 1		2024-02-08	Medoba1/2-1/2-1/2, Teshuda 1-0-1, Amantane 1-1-1, Clozapine 0-0-0-1/2	Medoba1/2-1/2-1/2，Amantane1-0-1	Pingchi.1200-40 Lead；SR1101	STN	monopole	C+			3-						115	60	1.25		C+			7-						115	60	0.8
	DBS2023021402	Wang Yaqin	2023-03-14	Female	74	PD	5	Jiangsu	2023-02-16	Trembling, slow, stiff, abnormal movement, freezing, poor balance	Trembling, slow, stiff, abnormal movement, freezing	Yes	Yes	Level 1	18058760538	2024-02-16	Medoba1/2-1/2-1/2, Slaiglan 1-0-0, Senforo (0.25mg) 2-2-2	Medoba1/4-1/4-1/4，midopy1-0-0	Medtronic, 3389S, RC	STN	monopole	C+			2-						130	60	1.5		C+			10-						130	60	1
	DBS2023021301	Ge Maobing	2023-03-14	Male	53	PD	13	Liaoning	2023-02-15	Slow, stiff, dyskinesia	Slow, stiff, dyskinesia	Yes	Yes	Level 1	18502548388	2024-02-15	Medoba1/2-1/2-1/2, Slaiglan 1-0-0, Senforo (0.25mg) 1-0-1, Amantane 1-0-0, diphenhydroxysol 1/2-0-1/2, Daringfu 1/2-0-1/2	Medoba1/4-1/4-1/4，Amantane1-1-0	jingyu1200-40 Lead；SR1101	STN	monopole	C+			2-						130	60	2		C+			6-						130	60	2		Severe slow rigidity, low SID threshold (3- 2.0, 6- 1.5 SID, morning OFF interval), interval stimulation (ON 2s, OFF 3s) both ON&OFF improvements are good
	DBS2023021502	Sun Hongxian	2023-03-14	Female	67	PDD/DLB	5	Jinhua	2023-02-17	Trembling, hallucinations, cognitive decline, low blood pressure	Trembling (recurrence time >30s, DBS resistant)	Yes	Yes	Level 1	13998379655	2024-02-17	Medoba1-1-1, Prapexor (0.25mg) 2-2-2, Quetiapine 0-1-1; Quetiapine 50mg	Medoba1/2-1/2-1/2	Pingchi.1200-40 Lead；SR1101	STN	monopole	C+		2-							160	60	1.8		C+			7-						160	60	1.3		Right upper limb tremor is stubborn; left lower limb has lateral deviation after hip joint replacement surgery
	DBS2023021601	Ang Shengjiang	2023-03-15	Male	65	PD	7	Hebei	2023-02-20	Slow, stiff, dyskinesia	Slow, stiff, dyskinesia	Yes	Yes	Level 1	13868998010	2024-03-15	Medoba3/4-3/4-3/4-1/2, Prapexor (0.375mg) 2-0-1	Medoba1/2-1/2-1/2-1/2，Prapexor（0.375mg）0-0-0-1	Pingchi.1200-40 Lead；SR1101	STN	monopole	C+			2-						130	60	1.8		C+			6-						130	60	1.5		ON 2s, OFF 3s
	DBS2023021501	Hu Xiaodun	2023-03-16	Male	60	PD	11		2023-02-20	Slow, stiff, medication wearing off	Slow, stiff, leg pain	Yes	No	Level 3	13400126920	2024-02-20	Medoba1-1-1-1/2, Kedan 1-1-1-1/2, Slaiglan 1-0-0, Senforo (0.25mg) 3-3-3	Medoba1/2-1/2-1/2，Senforo（0.25mg）0-0-0-1，Slaiglan1-0-0	Pingchi.1200-40 Lead；SR1101	STN	monopole	C+		2-							130	60	2		C+		6-							130	60	1.8		The开机 effect is significantly effective
	DBS2023031403	Wang Youling	2023-03-14	Female	57	Meige	4	Shanghai	2023-02-14	Difficulty opening eyes, increased blinking	Difficulty opening eyes, increased blinking	No	Yes	Level 3		2024-02-14	No	No	jingyu1200-40 Lead；SR1101	Gpi	monopole	C+		1-							110	80	2.4		C+		5-							110	80	2.4		Bilateral ON 2s, OFF 3s
	DBS2023020802	Tian Bingsong	2023-03-14	Male	61	PD	6	chekiang	2023-02-13	Slow, stiff	Slow, stiff	Yes	No	Level 3	17717632337	2024-02-13	Medoba1/2-1/2-1/2, Prapexor (0.375mg) 1/2-1/2-1/2	Medoba 1/2-1/4-1/2，Prapexor（0.375mg）0-0-0-1	Medtronic, 3389S, RC	STN	monopole	C+		1-							130	60	2		C+		9-							130	60	1.4		The开机 effect is significantly effective; after turning on, there is mild SID + euphoria
	DBS2023021401	Mei Jianrong	2023-03-14	Male	54	PD	8	Shanghai	2023-02-16	Slow, stiff, freezing (DA response good), posture left tilt	Slow, stiff, freezing	Yes	No	Level 3	18367801173	2024-02-16	Medoba1/2-1/2-1/2, Prapexor (0.25mg) 3/2-3/2-3/2, Slaiglan 1-0-0	Medoba 1/2-1/4-1/2，Slaiglan1-0-0	Pingchi.1200-40 Lead；SR1101	STN	monopole	C+			3-						130	60	1.3		C+				8-					130	60	1.5
	DBS2022071301	Li Ming	2023-03-17	Male	37	PD	19		2023-01-04	SID, unstable turning to the left, left lower limb quasi-freezing	Abnormal movement, dystonia	Yes	Yes	Level 1		2024-01-04	diphenhydroxysol 1/2-1/2-1/2, Amantane1-0-1, Rothigottin4mg1-0-0, Ratary(145mg)1-1-1	diphenhydroxysol 1/2-0-1/2，Amantane1-0-1，Rothigottin4mg1-0-0,Ratary(145mg)1-1-1	Pingchi.1200-40 Lead；SR1101	STN	monopole	C+			3-						125	70	2.75		C+				8-					125	70	2.05		After programming for 2 days, the right limb has intermittent tightness; the left limb feels like it has returned to before programming; lowered from 3.20 remote 3- to 2.5V, the above all improved
		Zhang Lanzhen	2023-03-20	Female	69	PD	9	Shanghai	2023-02-22	Trembling, slow, stiff, RLS in the lower limbs at night after starting up	Lower limb RLS	Yes	No	Level 2		2024-02-22	Medoba1/2-1/2-1/2-1/4, diphenhydroxysol 1-1-1	Medoba 1/2-1/4-1/2(If the change is obvious.)1/2-1/2-1/2），diphenhydroxysol 1/2-0-1/2,Prapexor（0.25mg）0-0-0-1	Pingchi.1200-40 Lead；SR1101	STN	monopole	C+			3-						130	60	1.2	1232	C+			7-						130	60	1.8	1294
		Wu Chundi	2023-03-20	Male	75	PD	14		2023-02-24	Trembling, slow, stiff, hallucinations, paranoia	Hallucinations, delusions	Yes	Yes	Level 1	18017823116	2024-02-24	Medoba1-1-1, Kedan1/2-1/2-1/2, Slaiglan1-0-1, Senforo (0.25mg)1-1-1	Medoba1/2-1/2-1/2，Senforo（0.25mg）0-0-0-1，RivalatineẠ（1.5mg）0-0-0-1	Pingchi.1200-40 Lead；SR1101	STN	monopole	C+				4-					130	60	1	1235	C+			7-						130	60	1.7	1061
		Zheng Li	2023-03-20	Male	61	PD	7	chekiang	2023-02-23	Tremor, slow, stiff	-	Yes	Yes	Level 2		2024-02-23	Medoba1/2-1/2-1/2, Xi Ning1/2-0-1/2, diphenhydroxysol 1-1-1, Prapexor (0.25mg)1-1-1, Amantane1-0-1, Slaiglan1-1-0	Medoba1/2-1/2-1/2，Amantane1-1-0，midopy1-0-0，Prapexor（0.25mg）0-0-1	jingyu1200-40 Lead；SR1101	STN	monopole	C+		1-							130	60	2.1	1.1	C+		5-							130	60	1.7	1.48
		Liu Chunqian	2023-03-21	Male	57	PD	13	Jiangsu	2023-02-23	Slow, stiff, Abnormal movement, freezing	Abnormal movement (SID), freezing	Yes	No	Level 1	13008959279	2024-02-23	Medoba1/4-1/4-1/4-1/4, Xi Ning0-0-0-1/2, Senforo (0.25mg)1-0-0 or 1-0-1, Daringfu1-1-1-1-1	Medoba1/2-1/2-1/2，Xi Ning0-0-0-1/2	Medtronic, 3389S, RC	STN	monopole	C+			2-						130	60	1.9		C+			10-						130	60	1.4
		Cai Debo	2023-03-21	Male	69	ET-plus	10	Hefei	2023-02-21	Tremor, slow, stiff	Tremor for 9 years, jaw tremor + bradykinesia for 1 year	No	No	Level 3	15366518892	2024-02-21	Medoba1/2-1/2-1/2, diphenhydroxysol 1-0-1, VitaminB6 1-1-1	No	Medtronic, 3389S, RC	VIM-PSA	monopole	C+	0-								140	60	2		C+	8-								140	60	2
		Jiang Xinjiang	2023-03-27	Male	55	PD	9		2023-02-28	Slow, stiff	-	Yes	Yes	Level 2	13170015221	2024-02-28	Medoba3/4-3/4-3/4, Xi Ning1/2-1/2-1/2, Resa Gilan1-0-0, Senforo (0.25mg)1-1-1, diphenhydroxysol 1/2-1/2-1/2, VitaminB6 1-1-1	Medoba1/2-1/2-1/2-1/2，diphenhydroxysol 1/2-0-1/2，Resa Gilan1-0-0	Medtronic, 3389S, RC	STN	monopole	C+			2-						130	60	1.5		C+			10-						130	60	1.6
		Zhang Weizeng	2023-03-27	Male	49	dystonia	6	Henan	2023-02-27	Blinking, drooping head, twisting head to the right (torticollis)	-	No	Yes	Level 3		2024-02-27	diphenhydroxysol 1-1-1		Medtronic, 3389S, RC	GPI	monopole	C+		1-							130	60	2.5		C+	8-								130	60	2
		Zhang Zhanfeng	2023-03-29	Male	53	PD	7	Shanghai	2022-03-29	Trembling, stiffness	-	No	No	Level 3	15838070587	2024-03-29	Occasionally take Medoba1/4	Medoba1/4-0-1/4	jingyu1200-40 Lead；SR1101	STN	monopole	C+			2-						180	80	3.15		C+		5-							160	60	3.25
		Zhang Qin	2023-03-22	Female	73	PD	13		2022-01-24	-	-	No	No	Level 3	18901921314	2024-01-24	Xi Ning1/2-1/2-1/2-1/2, Prapexor (0.75mg)1-0-0, amantadine1-1-1, VitaminB6 1-1-1	Xi Ning1/2-1/2-1/2-1/2，Prapexor（0.75mg）1-0-0，amantadine1-1-1，VitaminB6 1-1-1	Pingchi.1200-40 Lead；SR1101	STN	monopole	C+		2+							150	80	2.5	1000	C+		6+		8-					150	60	0.6	878
		Qian Suzhen	2023-03-22	Female		PD		chekiang	2022-03-24	Abnormal movement, freezing; SID	Dyskinesia, freezing	No	No	Level 1		2024-03-24	Medoba1/2-1/2-1/2-1/2, Xi Ning1/2-1/2-1/2, amantadine1-1-0, Clozapine0-0-1	Medoba1/4-1/4-1/4，Xi Ning1/2-0-1/2，amantadine1-1-0，Clozapine0-0-1	Pingchi.1200-40 Lead；SR1101	STN	cross	C+			3-						125	60	2.15		C+			7-						125	60	2.2
		Qian Suzhen	2023-03-22	Female		PD		chekiang	2022-03-24	Abnormal movement, freezing; SID	Dyskinesia, freezing	No	No	Level 1		2024-03-24	Medoba1/2-1/2-1/2-1/2, Xi Ning1/2-1/2-1/2, amantadine1-1-0, Clozapine0-0-1	Medoba1/4-1/4-1/4，Xi Ning1/2-0-1/2，amantadine1-1-0，Clozapine0-0-1	Pingchi.1200-40 Lead；SR1101	STN	cross	C+				4-					125	60	2.15
		Zhou Genying	2023-03-29	Female	63	PD	31	Shanghai	2022-02-17	Postural deviation to the left, freezing, pain, depression	Freezing	No	No	Level 2	13326181617	2024-02-17	Medoba1/4-1/4-1/4, Prapexor (0.25mg)1-1-1	Medoba1/4-1/4-1/4，Prapexor（0.25mg）1-1-1	jingyu1200-40 Lead；SR1101	STN	cross	C+			2-						130	90	3.1		C+			6-						145	80	3
		Zhou Genying	2023-03-29	Female	63	PD	31	Shanghai	2022-02-17	Postural deviation to the left, freezing, pain, depression	Freezing	No	No	Level 2	13326181617	2024-02-17	Medoba1/4-1/4-1/4, Prapexor (0.25mg) 1-1-1	Medoba1/4-1/4-1/4，Prapexor（0.25mg）1-1-1	jingyu1200-40 Lead；SR1101	STN	cross	C+				3-					130	60	2.6		C+		5-							145	90	2.35
		Zhang Lingen	2023-03-29	Male	75	PD	11	Shanghai	2021-02-02	Left lower limb aching, freezing, muscle contraction sensation + akathisia	Freezing	No	No	Level 3	18021027925	2024-02-02	Medoba1/4-1/4-1/4-1/4	Medoba1/4-1/4-1/4，Prapexor（0.25mg）0-0-0-1	Pingchi.1200-40 Lead；SR1101	STN	cross	C+		2-							110	70	2.6		C+
		Zhang Lingen	2023-03-29	Male	75	PD	11	chekiang	2021-02-02	Left lower limb aching, occasional freezing, muscle contraction sensation + akathisia	Freezing	No	No	Level 3	18021027925	2024-02-02	Medoba1/4-1/4-1/4-1/4	Medoba1/4-1/4-1/4，Prapexor（0.25mg）0-0-0-1	Pingchi.1200-40 Lead；SR1101	STN	cross	C+			3-						110	60	2.2		C+		6-							110	70	2.8
		Wang Zukang	2023-03-29	Male		PD	6		2021-06-15	Abnormal movement improvement, Med-ff MDS-UPDRS 30, cognition (MMSE26, MOCA20, FDG cortical hypometabolism range has a tendency to decrease compared to before, left occipital-parietal lobe), non-motor (RBD worsened, SBP difference >26mmHg, significant increase in basal blood pressure)	Abnormal movement, RBD, urinary incontinence + orthostatic hypotension with SBP difference >53mmHg + impotence, hallucinations, subjective cognitive decline MMSE 24, MOCA 19, FDG cortical hypometabolism	Yes	Yes	Level 1	13621973595	2024-06-15			Pingchi.1200-40 Lead；SR1101
		Shen Aiqin	2023-04-03	Female	58	PD	7	Shanghai	2023-03-06	Abnormal movement, slow, stiff, on-off	Dyskinesia	Yes	No	Level 2	13335857690	2024-04-06	Medoba1/2-1/2-1/2-1/2, Ntakapong1/2-1/2-1/2-1/2, Prapexor (0.25mg) 1-1-1-1, Silem1/2-1/2-1/2-1/2	Medoba1/2-1/2-1/2，Prapexor0-0-0-1	Medtronic, 3389S, RC	STN	monopole	C+			2-						130	60	1.8		C+			10-						130	60	1.5
		Ye Ping	2023-04-03	Female	55	dystonia	2	Shanghai	2023-03-03	Postural deviation to the right	-	Yes	No	Level 1		2024-03-03	Clonazepam 0-0-0-1		jingyu1200-40 Lead；SR1101	Gpi		C+	0-								130	60	2.2	1.11	C+	4-								130	60	2	1
		Liu Yuping	2023-04-03	Female	62	PD	3	Shanghai	2023-03-03	Difficulty opening eyes	-	No	?	Level 3		2024-03-03			jingyu1200-40 Lead；SR1101	Gpi		C+	-								70	110	1.9	0.78	C+	-								80	130	2.2	0.79
		Gong Yigang	2023-04-04	Male		PD	7	Shanghai	2021-04-08	Weakness in both lower limbs	-	No	?	Level 3	18052421632	2024-04-08	Medoba1/2-1/2-1/4, Prapexor (0.75mg) 1-1-1, amantadine 1/2-0-1/2, VitaminB6 1-1-1	Medoba1/2-1/2-1/4，Prapexor（0.75mg）1-1-1，amantadine1/2-0-1/2，VitaminB61-1-1	Pingchi.1200-40 Lead；SR1101	STN	cross	C+		2-							115	60	2.2	1167	C+			7-						115	60	2.6	996
		Gong Yigang	2023-04-04	Male		PD	7	Shanghai	2021-04-08	Weakness in both lower limbs	-	No	?	Level 3	18052421632	2024-04-08	Medoba1/2-1/2-1/4, Prapexor (0.75mg) 1-1-1, amantadine 1/2-0-1/2, VitaminB6 1-1-1	Medoba1/2-1/2-1/4，Prapexor（0.75mg）1-1-1，amantadine1/2-0-1/2，VitaminB61-1-1	Pingchi.1200-40 Lead；SR1101	STN	cross	C+			3-						1.5	60	1.2	1145	C+		6-							115	60	1.55	1114
		Wang Yonghui	2023-04-10	Male	64	PD	10	Anhui	2023-03-07	End of dose, fluctuation, freezing	End of the dose, freezing	Yes	No	Level 2		2024-04-07	Medoba3/4-3/4-3/4-1/4, Xi Ning 1/2-1/2-1/2-1/2, Slaiglan 1-1-0, amantadine 1/2-0-1/2, Clozapine 0-0-0-1/2, VitaminB6 1-1-1	Medoba1/2-1/2-1/2，Xi Ning0-0-0-1/2，VitaminB61-1-1，amantadine1/2-1/2-0，Clozapine0-0-0-1/2	Pingchi.1200-40 Lead；SR1101	STN	cross	C+		2-							65	60	1.2	900	C+			7-						65	60	1.1	931
		Wang Yonghui	2023-04-10	Male	64	PD	10	Hangzhou	2023-03-07	End of dose, fluctuation, freezing	End of the dose, freezing	Yes	No	Level 2		2024-04-07	Medoba3/4-3/4-3/4-1/4, Xi Ning 1/2-1/2-1/2-1/2, Slaiglan 1-1-0, amantadine 1/2-0-1/2, Clozapine 0-0-0-1/2, VitaminB6 1-1-1	Medoba1/2-1/2-1/2，Xi Ning0-0-0-1/2，VitaminB61-1-1，amantadine1/2-1/2-0，Clozapine0-0-0-1/2	Pingchi.1200-40 Lead；SR1101	STN	cross	C+				4-					65	70	1	1029	C+	5-								65	60	0.7	1140
		Gong Ming	2023-04-10	Male	70	PD	8	chekiang	2023-03-09	Tremor, slow, stiff	-	Yes	No	Level 2	13916796443	2024-04-09	Medoba1/2-1/2-1/2	Medoba1/2-1/2-1/2	Medtronic, 3389S, RC	STN	Double negative	C+	0-		2-						170	60	1.7	762	C+		9-							170	60	1.6	1075
		Lu Xingxia	2023-04-10	Female	75	PD	6	chekiang	2023-03-13	Tremor, slow, stiff	-	Yes	No	Level 2	13605640501	2024-03-13	Medoba3/4-3/4-3/4-3/4, amantadine 1/2-0-1/2, Rivalatine汀 0-0-0-1, Quetiapine 0-0-0-1/2	Medoba1/4-1/4-1/4-1/4，amantadine1/2-1/2-0，RivalatineẠ1-0-1，Quetiapine0-0-0-1/2	Medtronic, 3389S, RC	STN	monopole	C+			2-						130	60	1.7	1362（1258）	C+			10-						130	60	1.7（1.6）	1047
		Song Xiuzhen	2023-04-10	Female	51	PD	8	Jiangsu	2023-03-13	Trembling, slow, stiff, pain, dysarthria	-	Yes	No	Level 2	13575775896	2024-03-13	Medoba1/2-1/2-1/2-1/2, Senforo(0.25mg) 1/2-1/2-1/2, amantadine 1/2-1-0	Medoba1/4-1/4-1/4，Senforo（0.25mg）0-0-0-1，amantadine1/2-1/2-0	Pingchi.1200-40 Lead；SR1101	STN	Double negative	C+		2-							150	60	1.3	1757	C+		6-	7-						150	70	1.65	924
		Xu Peihong	2023-04-11	Male		PD	6	Jiangxi	2023-03-07	Tremor, slow, stiff	-	Yes	Yes	Level 1	13805861444	2024-03-07	Medoba3/4-1/2-1/2, Xi Ning 1/2-1/2-1/2, Prapexor (0.25mg) 1-1-1	Medoba1/2-1/2-1/2，Prapexor（0.25mg）1-1-1	jingyu1200-40 Lead；SR1101	STN	Double negative	C+			2-						180	60	1.9	1.08	C+	4-		6-						175	60	1.4	1.23
		Feng Shuigen	2023-04-11	Male	56	PD	10	chekiang	2023-03-11	Tremor, slow, stiff	-	Yes	No	Level 2	13665759543	2024-03-13	Medoba1-1-1, amantadine 1-1-1	Medoba1/2-1/2-1/2（DiscretionaryЯ䐯1/4-1/4-1/4），amantadine1/2-1/2-0	Pingchi.1200-40 Lead；SR1101	STN	monopole	C+			3-						145	60	0.9	1604	C+		6-							145	60	1.4	1504
		Fan Cunlai	2023-04-12	Male	58	PD	8	Tai'an	2023-03-09	Trembling, slow, stiff, festination	-	Yes	Yes	Level 1	15986651739	2024-03-09	Medoba1-1-1, diphenhydroxysol 1/2-0-1/2, Teshuda 0-0-0-1	Medoba1/2-1/2-1/2	Pingchi.1200-40 Lead；SR1101	STN	monopole	C+		2-		4-					150	60	1.4	1039	C+			7-						150	60	0.9	1646
		Liu Ping	2023-04-17	Male	68	PD	5	chekiang	2023-03-23	Tremor, slowness, rigidity, wearing off	Wearing off	Yes	No	Level 2	13707958529	2024-03-23	Medoba three-quarter-three-quarter-half, Senforo (0.25mg) once a day, Daringfu once a day	Medoba1/4-1/4-1/4-1/4，Senforo（0.25mg）1/2-1/2-1/2-1/2	Pingchi.1200-40 Lead；SR1101	STN	monopole	C+		2-							140	60	1.6		C+			7-						140	60	1		The second contact on the dorsal side of Bilateral was turned on, the slow stiffness improved, the tremor improved, and the tremor improved after increasing the frequency, and the limb abnormal movement appeared 1 hour after oral administration of Medoba1/2, and the next day
		Li Qiang	2023-04-17	Male	73	PD	8	chekiang	2023-03-24	Tremor, slow	-	Yes	No	Level 2	13362825957	2024-03-24	Medoba three-quarter-three-quarter-three-quarter, Xi Ning half-zero-half, amantadine half-zero-half, Vitamin B6 once a day, Teshuda half-zero-half	Medoba1/2-1/2-1/2，Xi Ning0-0-0-1/2	Pingchi.1200-40 Lead；SR1101	STN	monopole	C+			3-						130	60	1.7		C+			7-						130	60	1.2		Bilateral dorsal 2nd contact is turned on, slow stiffness improves, left ventral 2 improves slow stiffness, left ventral 2 improves slow stiffness, left side adjusts contact to ventral 2, the next day
		Lu Ping	2023-04-18	Male	40	PD	10	chekiang	2023-03-21	Trembling, slow, stiff, on-off, fluctuation	On-off	Yes	Yes	Level 1	13615489211	2024-03-21	Medoba half-half-half, Prapexor (0.25mg) half-half-half, diphenhydroxysol zero-zero-zero-half, amantadine once-zero-once	Medoba1/2-1/2-1/2	Medtronic, 3389S, RC	STN	monopole	C+			2-						130	60	1.5		C+		9-							130	60	1
		Lin Jingyun	2023-04-19	Male		PD	13		2023-03-17	Tremor, slow, stiff	-	Yes	No	Level 2	13184388303	2024-03-17	Medoba once-once-once, Teshuda once-once-once	Medoba1/4-1/4-1/4，Teshuda0-0-0-1	Pingchi.1200-40 Lead；SR1101	STN	monopole	C+			3-						130	60	1		C+		6-							130	60	1.3
	Dong Xinming		2023-04-26	Male	55	PD	10	Hunan	2021-04-25	Dyskinesia	Dyskinesia	No	?	Level 3	13516893809	2024-04-25	Medoba half-half-half-half, Xi Ning half-zero-half, amantadine once-once-once, Teshuda once-once-once	Medoba1/2-1/2-1/2-1/2，Teshuda0-0-0-1，amantadine1-1-1	Pingchi.1200-40 Lead；SR1101	STN	cross	C+		2-							105	70	4.1		C+		6-							105	70	4.1
		Dong Xinming	2023-04-26	Male	55	PD	10		2021-04-25	Dyskinesia	Dyskinesia	No	?	Level 3	13516893809	2024-04-25	Medoba half-half-half-half, Xi Ning half-zero-half, amantadine once-once-once, Teshuda once-once-once	Medoba1/2-1/2-1/2-1/2，Teshuda0-0-0-1，amantadine1-1-1	Pingchi.1200-40 Lead；SR1101	STN	cross	C+				4-					105	60	2		C+				8-					105	50	3.5
		Liu Buquan	2023-04-18	Female	66	Meige	1.5	chekiang	2023-03-20	Difficulty opening eyes	-	No	No	Level 1		2024-03-20	No	No		GPI	monopole	C+	0-								130	60	1	1578	C+	8-								130	60	1	1690
		Li Yunhua	2023-04-25	Female	58	PD	9	chekiang	2023-03-30	Slow, stiff, end of dose, on-off	End of the dose, on-off	Yes	No	Level 2	13975622952	2024-03-30	Medoba half-half-half-half, Slaiglan once-zero-once, Prapexor (0.75mg) two-zero-zero	Medoba1/4-1/4-1/4，Prapexor（0.75mg）0-0-0-1	Pingchi.1200-40 Lead；SR1101	STN	monopole	C+		2-							130	60	1.4		C+		6-							130	60	1.6
		Chen Xibin	2023-04-25	Male	62	PD	20		2023-03-29	Trembling, slow, stiff, hallucinations, abnormal movement, freezing	Freezing, dyskinesia	Yes	Yes	Level 1		2024-03-29	Medoba half-half-half-half, Ke Dan half-zero-zero, Xi Ning half-half-half (-half), Slaiglan once-zero-once, amantadine half-zero-half, Prapexor (0.25mg) one-one-one-one-one-one-one	Medoba（Xi Ning）1/4-1/4-1/4-1/4，Prapexor（0.25mg）1/2-1/2-1/2-1/2，amantadine1/2-0-1/2，	Pingchi.1200-40 Lead；SR1101	STN	cross	C+			3-						125	60	1.05	975			6-	7+						125	70	1.55	743
		Chen Xibin	2023-04-25	Male	62	PD	20	Shanghai	2023-03-29	Trembling, slow, stiff, hallucination, Abnormal movement, freezing	Freezing, dyskinesia	Yes	Yes	Level 1		2024-03-29	Medoba half-half-half-half, Ke Dan half-zero-zero, Xi Ning half-half-half (-half), Slaiglan once-zero-once, amantadine half-zero-half, Prapexor (0.25mg) one-one-one-one-one-one-one	Medoba（Xi Ning）1/4-1/4-1/4-1/4，Prapexor（0.25mg）1/2-1/2-1/2-1/2，amantadine1/2-0-1/2，	Pingchi.1200-40 Lead；SR1101	STN	cross														C+				8-					125	60	1.75	998
		Zhang Zhonghua	2023-05-04	Male	57	PD	8	Shanghai	2023-04-06	Trembling, slow, stiff, freezing, Abnormal movement	Freezing, dyskinesia	Yes	Yes	Level 1	15336667095	2024-04-06	Medoba half-half-half, Ke Dan half-half-half, Xi Ning half-half-half, Resa Gilan one-zero-zero, amantadine half-zero-half, Teshuda once-once-once	Medoba1/2-1/2-1/2，amantadine1/2-0-1/2，Teshuda0-0-0-1	Medtronic, 3389S, RC	STN	monopole	C+			2-						130	60	1.4		C+			10-						130	60	2.2
		Han Mugen	2023-05-04	Male	73	PD	5		2023-04-06	Slow, stiff, end of the dose, Abnormal movement	End-of-dose, dyskinesia	Yes	Yes	Level 1	13758592251	2024-04-06	Medoba half-three-quarter-half-quarter, Xi Ning half-half-half-half, Senforo (0.25mg) zero-half-zero-half, Slaiglan once-zero-once, Rivalatine Ting one-zero-one	Medoba1/2-1/2-1/2-1/4，Senforo（0.25mg）0-1/2-0-1/2，RivalatineẠ1-0-1	Medtronic, 3389S, RC	STN	monopole	C+			2-						120	60	1.3		C+			10-						120	60	2
		Wang Qun	2023-05-04	Female	73	ET	30	Shandong	2023-03-17	Tremor in both upper limbs and head	-	No	?	Level 3		2024-04-17	No	No	Medtronic, 3389S, RC	VIM-PSA	monopole	C+	0-								160	60	2		C+	8-								160	90	2
		Xia Dezhen	2023-04-19	Female	75	PD	19	Sichuan	2023-03-10	Weakness in both lower limbs	-	No	No	Level 3	13621855180	2024-03-10	Medoba1/4-1/4-1/4-1/4, amantadine1-0-1	Medoba1/4-1/4-1/4-1/4，amantadine1-0-1	Pingchi.1200-40 Lead；SR1101	STN	cross	C+		2-							125	70	1.9	1283	C+		6-							125	60	2.15	1671
		Xia Dezhen	2023-04-19	Female	75	PD	19	Jiangsu	2023-03-10	Weakness in both lower limbs	-	No	No	Level 3	13621855180	2024-03-10	Medoba1/4-1/4-1/4-1/4, amantadine1-1-0	Medoba1/4-1/4-1/4-1/4，amantadine1-1-0	Pingchi.1200-40 Lead；SR1101	STN	cross	C+				4-					125	70	3.1	1158	C+				8-					125	60	2.5	1106
		Huang Zhenru	2023-04-10	Female	68	Meige	4		2023-04-10	Eyelid spasm, more severe on the right	-	No	No	Level 1		2024-04-10	?	?			monopole	C+		-							140	90	1.5	939	C+	-								140	60	1.7	976
		Zhou Shiping	2023-05-08	Female	60	PD	8	chekiang	2023-04-03	Trembling, slow, stiff, fluctuation	-	Yes	No	Level 3	15385403069	2024-04-03	Medoba1-1-1, Kedan1/2-1/2-1/2, Senforo（？）1-1-1, diphenhydroxysol 1-1-1	Medoba1-1-1，Kedan1/2-1/2-1/2，Senforo（？）1-1-1，diphenhydroxysol 1-1-1	jingyu1200-40 Lead；SR1101	STN	monopole	C+			-						130	60	1.6		C+		-							130	60	1.4
		Cheng Xiaoping	2023-05-08	Female	53	Meige	2	Jiangsu	2023-04-12	Eyelid spasm	-	No	No	Level 1		2024-04-12	Baclofen1/2-0-1/2, methylcobalamin1-1-1	Baclofen1/2-0-1/2，methylcobalamin1-1-1	Medtronic, 3389S, RC	GPI	monopole	C+	-								120	90	1.75	1269	C+	-								120	90	1.75	1308
		Qi Jinchang	2023-05-08	Male	67	PD	8	chekiang	2023-04-04	Trembling, slow, stiff, fluctuation	-	Yes	No	Level 3	13573873493	2024-04-04	Medoba1/2-1/2-1/2-1/2, Teshuda0-0-0-1, VitaminB1.1-0-0, amantadine1-0-0	Medoba1/4-1/4-1/4，Teshuda0-0-0-1	Pingchi.1200-40 Lead；SR1101	STN	monopole	C+				4-					170	60	2.4	1083	C+				8-					170	60	2.6	979
		Liu Zhaoquan	2023-05-09	Male	60	MSA	8	chekiang	2023-04-11	Slow, stiff, trembling, end of the dose, freezing	End of the dose, freezing	Yes	No	Level 2	13686851400	2024-04-11	Xi Ning1-1-1, diphenhydroxysol 1/2-1/2-1/2, VitaminB6.1-1-1, Senforo（0.25mg）1-0-1	Xi Ning1/4-1/4-1/4，Medoba1/4-1/4-1/4	Pingchi.1200-40 Lead；SR1101	STN	monopole	C+			3-						130	60	1.4	1335	C+		6-							130	60	1.35	1860
		Chen Hanming	2023-05-09	Male	57	PD	13	Jiangsu	2023-04-07	Slow, stiff, end of the dose, freezing, Abnormal movement	End of the dose, freezing, abnormal movement	Yes	No	Level 2	13705108078	2024-04-07	Medoba3/4-3/4-3/4-3/4, Xi Ning1/2-0-0-1/2, Prapexor（0.25mg）1-0-0-1, diphenhydroxysol 1/2-1/2-1/2-1/2, VitaminB6.1-1-1-1, Levetiracetam1-0-1	Medoba1/4-1/4-1/4-1/4	jingyu1200-40 Lead；SR1101	STN	monopole	C+		-							130	60	1.7		C+		-							130	60	1.3
		Wang Xingyan	2023-05-15	Female	55	Meige	3	Liaoning	2023-04-10	Eyelid spasm, involuntary movements of the mouth and lower jaw	-	No	No	No		2024-04-10	diphenhydroxysol 1-0-1, CNZ(1mg）1-0-1	diphenhydroxysol 1-0-1，CNZ(1mg）1-0-1	jingyu1200-40 Lead；SR1101	GPI	monopole	C+		1-							125	90	1.45		C+			10-						125	90	1.15
		Mao Jiguo	2023-05-18	Male	50	PD	10		2023-04-20	Tremor, slow, stiff, waning effect	-	Yes	Yes	Level 1	13805808472	2024-04-20	Medoba1/2-1/2-1/2-1/2, Senforo0-0-0-1/2, diphenhydroxysol 1/2-1/2-1/2-1/2	Medoba1/2-1/2-1/2-1/2，Senforo0-0-0-1/2，diphenhydroxysol 1/2-1/2-1/2-1/2	Medtronic, 3389S, RC	STN	monopole	C+				3-					125	90	1.2															Medtronic cross electrical pulse clinical trial
		Ma Dengming	2023-05-16	Male	59	PD	4	Sichuan	2023-04-21	Slowness, rigidity, end-of-dose	Wearing off	Yes	No	Level 2	18762373951	2024-04-21	Medoba1/2-1/2-1/2-1/2, Silem1/2-1/2-1/2-1/2, Prapexor(0.25mg)1-1-1-1	Medoba1/2-1/2-1/2-1/2，Silem1/2-1/2-1/2-1/2，Prapexor(0.25mg)1-1-1-1	Pingchi.1200-40 Lead；SR1101	STN	monopole	C+		2-							130	60	1.7	1533	C+		6-							130	60	1.8	855
		Lv Zongfa	2023-05-17	Male	65	PD	40	Hunan	2023-04-19	Trembling, slow, on-off phenomenon	On-off	Yes	No	Level 2	13819691257	2024-04-19	Medoba1/4-1/4-1/4-1/4-1/4, Jin Siping1-0-0, amantadine1-0-1, diphenhydroxysol 1-1-1	Medoba1/4-1/4-1/4-1/4-1/4，Jin Siping1-0-0，amantadine1-0-1，diphenhydroxysol 1-1-1	Pingchi.1200-40 Lead；SR1101	STN	monopole	C+			3-						145	60	1.7	1249	C+			7-						145	60	1.55	1248
		Li Fengming	2023-05-18	Female	69	PD	6		2023-04-28	Tremor, slow, stiffness, dyskinesia	Dyskinesia	Yes	No	Level 2	13757229319	2024-04-28	Medoba1/2-1/2-1/2, Kedan1-1-1, amantadine1-0-0	Medoba1/2-1/2-1/2,Kedan1-1-1，amantadine1-0-0	jingyu1200-40 Lead；SR1101	STN
		Cheng Suzhen	2023-05-22	Female	67	PD	6	Fujian	2023-04-27	Tremor, slowness, stiffness, wearing off, dyskinesia	Abnormal movement, end of the dose	Yes	Yes	Level 1	13646218106	2024-04-27	Medoba3/4-3/4-3/4-3/4, Xi Ning1/2-0-1/2, amantadine1/2-0-1/2, Rivalatine汀1-0-1	Medoba1/4-1/4-1/49orDon't take）	Medtronic, 3389S, RC	STN	monopole	C+			-						160	60	2.5	1619	C+			-						160	60	2.6	1237
		Wang Ming'e	2023-05-23	Female	74	PD	4	Fujian	2023-04-28	Trembling, slow, palpitations	-	Yes	No	Level 3	15940993590	2024-04-28	Medoba 1/2-1/2-1/2-1/2, Senforo (0.25mg) 1-1-1, Xi Ning 1/2-1/2-1/2-1/2 (Irregular use), Kedan 1/2-1/2-1/2 (Irregular use)	Medoba1/2-1/2-1/2	Pingchi.1200-40 Lead；SR1101	STN	monopole	C+				-					130	70	2		C+			-						130	60	1.5
		Fan Jiawei	2023-05-24	Male	23	Dystonia	3		2022-12-	Neck extension with involuntary forward extension of both upper limbs	Gene	No	No	Level 1		2024-12-01	No	No	jingyu1200-40 Lead；SR1101	GPI	monopole	C+	0-								130	100	2		C+	4-								130	110	2.7
		Dong Shuhua	2023-05-25	Female	46	PD	8	chekiang	2023-04-25	Trembling, slow, freezing	Freezing	Yes	No	Level 2	13587488035	2024-04-25	Medoba 1/4-1/2-1/2, Xi Ning 1-0-0, Kedan 1-1-1, Resa Gilan 1-0-0, amantadine 1-0-1, diphenhydroxysol 1/2-1/2-1/2	Medoba1/4-1/2-1/2，Xi Ning1-0-0，Kedan1-1-1，Resa Gilan1-0-0，amantadine1-0-1，diphenhydroxysol 1/2-1/2-1/2	Pingchi.1200-40 Lead；SR1101	STN	monopole	C+		2-							130	60	1.7		C+		6-							130	60	1.6
		Wang Qizhan	2023-05-25	Male	51	PD	3	chekiang	2023-04-24	Trembling, slow, stiffness, on-off phenomenon, fluctuation, on period 2h	On-off	Yes	No	Level 2	13974390736	2024-04-24	Medoba 1-1-1-1-1, Slaiglan 1-0-1, amantadine 1-0-1	Medoba1-1-1-1-1，Slaiglan1-0-1，amantadine1-0-1	Pingchi.1200-40 Lead；SR1101	STN	monopole	C+		2-							130	60	1.7		C+		6-							130	60	1
		Huang Liming	2023-05-25	Male	68	PD	19	Shanghai	2023-04-23	Trembling, slow, stiffness, end of the dose, on period Abnormal movement	Abnormal movement, end of the dose	Yes	Yes	Level 1	18368555357	2024-04-23	Medoba 1-3/4-3/4-3/4, Teshuda 1-1-1-1	Medoba1-3/4-3/4-3/4，Teshuda1-1-1-1	jingyu1200-40 Lead；SR1101	STN	monopole	C+		1-							130	60	1.4	1.32	C+		5-							130	60	1.5	1.65
		Deng Wenlong	2023-05-25	Male	66	PD	5	chekiang	2023-04-18	Trembling, slow, stiffness, end of the dose, fluctuation	Wearing off	Yes	No	Level 2	18179419521	2024-04-18	Medoba 1/4-1/2-1/2-1/4, Senforo (0.25mg) 1/2-0-1/2, Levetiracetam 1-0-1	Medoba1/4-1/2-1/2-1/4，Senforo（0.25mg）1/2-0-1/2，Levetiracetam1-0-1	Pingchi.1200-40 Lead；SR1101	STN	monopole	C+		2-							130	60	2.2	1152	C+		6-							130	60	1.5	1152
		Chen Shuxin	2023-05-31	Male	67	PD	28	Shanghai	2023-04-20	Trembling, slow, stiffness, freezing, Abnormal movement	Freezing, dyskinesia	Yes	Yes	Level 1	13567287150	2024-04-20	Medoba 1/2-1/2-1/2-1/2, Xi Ning 1/2-1/2-1/2-1/2, Senforo (0.25mg) 1-1-1, Clozapine 0-0-0-1, Clonazepam 0-0-0-1	Medoba1/2-1/2-1/2-1/2，Xi Ning1/2-1/2-1/2-1/2，Senforo(0.25mg)1-1-1,Clozapine0-0-0-1，Clonazepam0-0-0-1	jingyu1200-40 Lead；SR1101	STN	monopole	C+			2-						140	60	1.9		C+			6-						130	60	2.2
		Lu Haibin	2023-06-07	Male	61	PD	13	chekiang	2020-11-12	Rushing forward when walking	-	No	No	Level 3	13459781131		Senforo (0.25mg) 1-0-1	Senforo（0.25mg）1-0-1	Medtronic, 3389S, RC	STN		+			-						125	60	3	864	+		-							125	80	3.5	939
		Lu Haibin	2023-06-07	Male	61	PD	13	chekiang	2020-11-12	Rushing forward when walking	-	No	No	Level 3	13459781131		Senforo (0.25mg) 1-0-1	Senforo（0.25mg）1-0-1	Medtronic, 3389S, RC	STN		+		-							125	80	3	1053	+			-						125	80	3.5	848
		Chen Caiping	2023-06-07	Female	71	ET	10	Jiangxi	2023-05-09	Trembling of the head and limbs	-	No	No	No	15906875758	2024-05-09	Propranolol 2-2-2, Clonazepam 0-0-0-1/3	Propranolol2-2-2，Clonazepam0-0-0-1/3	jingyu1200-40 Lead；SR1101	VIM-PSA	monopole	C+	0-								125	60	1.7		C+	4-								130	60	1.5
		Pan Songhua	2023-06-07	Male	65	PD	11	Jiangxi	2021-06-09	-	-	No		Level 3	13735196491	2024-06-09	Medoba 1/4-1/4-1/4, Clonazepam (2mg) 0-0-0-1, Paroxetine 1-0-0, quetiapine tablets (50mg) 0-0-0-1, mirtazapine (7.5mg) 0-0-0-1	Medoba1/4-1/4-1/4	jingyu1200-40 Lead；SR1101	STN		+				-					130	70	2.5		+		-							135	80	2.6
		Pan Songhua	2023-06-07	Male	65	PD	11	Jiangsu	2021-06-09	-	-	No		Level 3	13735196491	2024-06-09	Medoba 1/4-1/4-1/4, Clonazepam (2mg) 0-0-0-1, Paroxetine 1-0-0, quetiapine tablets (50mg) 0-0-0-1, mirtazapine (7.5mg) 0-0-0-1	Medoba1/4-1/4-1/4	jingyu1200-40 Lead；SR1101	STN		+		-							130	80	2.4		-				-					135	80	2.5
		Tang Lihong	2023-06-05	Female	67	Dystonia	20	Shanghai	2023-05-04	Hyperactivity, more severe on the right	-	No	No	Level 1	15021276172	202/5/4	Clonazepam (2mg) 0-0-0-1/2, Baclofen 1-0-1, diphenhydroxysol 0-0-0-1/2	Clonazepam（2mg）0-0-0-1/2，Baclofen1-0-1，diphenhydroxysol 0-0-0-1/2	Medtronic, 3389S, RC	GPI		+		-							130	90	2	1273	+	-								130	90	1.7	1168
		Li Shaocai	2023-06-05	Male	54	Meige	8	Shanghai	2023-05-06	-	-	No	No	Level 1	13506872426	2024-05-06	None (Botulinum toxin injection once every 3-4 years)	No	Medtronic, 3389S, RC	GPI	monopole	C+	0-								130	60	2	1051	C+		9-							130	60	1.5
		Du Jinfeng	2023-06-13	Female	72	PD	20	chekiang	2023-05-08	Tremor, slow, rushing forward when walking, waning effect of medication	-	Yes	No	Level 2	13661986486	2024-05-08	Medoba 1-1-1, diphenhydroxysol 1/2-1/2-1/2, Prapexor (0.25mg) 1-0-1	Medoba1-1-1，diphenhydroxysol 1/2-1/2-1/2，Prapexor（0.25mg）1-0-1	jingyu1200-40 Lead；SR1101	STN	monopole	C+		1-							130	60	1.5		C+		5-							140	60	1.5
		Ang Shengjiang	2023-06-14	Male	64	PD	7	Shanghai	2023-02-20	Abdominal pain, squeezing sensation, chest tightness (relieved when Medoba takes effect), depression, abdominal discomfort during off period	Depression	Yes	Yes	Level 1	13868998010	2024-02-20	Medoba 1/2-1/2-1/2, Prapexor (0.375mg) 1-0-0, Rivalatine 0-0-0-1, lorazepam 1/2-1/2, escitalopram 1-0-0, trazodone 0-0-0-1	Medoba1/2-1/2-1/2，Prapexor（0.375mg）1-0-0	Pingchi.1200-40 Lead；SR1101	STN		+		-							VFS	60	1.85		+				-					VFS	60	2.7
		Ang Shengjiang	2023-06-14	Male	64	PD	7	Shanghai	2023-02-20	Abdominal pain, squeezing sensation, chest tightness (relieved when Medoba takes effect), depression, abdominal discomfort during off period	Depression	Yes	Yes	Level 1	13868998010	2024-02-20	Medoba 1/2-1/2-1/2, Prapexor (0.375mg) 1-0-0, Rivalatine汀 0-0-0-1, lorazepam 1/2-1/2, escitalopram 1-0-0, trazodone 0-0-0-1	Medoba1/2-1/2-1/2，Prapexor（0.375mg）1-0-0	Pingchi.1200-40 Lead；SR1101	STN		+				-					VFS	70	2.95		+			-						VFS	60	1.8
		Wu Jiangyan	2023-06-13	Female	46	PD	10	Jiangxi	2023-05-05	Freezing, on-off, slight abnormal movement, dysphagia, falling	Freezing, dyskinesia, on-off	Yes	No	Level 3	13979995315	2024-05-05	Medoba 3/4-3/4-3/4, Xi Ning 1/2-1/2-1/2, Prapexor (0.25mg) 1-1-1, diphenhydroxysol 1-1-1, amantadine 1-1-1, Clozapine 0-0-0-1/2	Medoba3/4-3/4-3/4，Xi Ning1/2-1/2-1/2，Prapexor（0.25mg）1-1-1，diphenhydroxysol 1-1-1，amantadine1-1-1，Clozapine0-0-0-1/2	jingyu1200-40 Lead；SR1101	STN	cross	C+			3-						145	60	1.7		C+			6-						130	60	1.8
		Wu Jiangyan	2023-06-13	Female	46	PD	10	Shanghai	2023-05-05	Freezing, on-off, slight abnormal movement, dysphagia, falling	Freezing, dyskinesia, on-off	Yes	No	Level 3	13979995315	2024-05-05	Medoba 3/4-3/4-3/4, Xi Ning 1/2-1/2-1/2, Prapexor (0.25mg) 1-1-1, diphenhydroxysol 1-1-1, amantadine 1-1-1, Clozapine 0-0-0-1/2	Medoba3/4-3/4-3/4，Xi Ning1/2-1/2-1/2，Prapexor（0.25mg）1-1-1，diphenhydroxysol 1-1-1，amantadine1-1-1，Clozapine0-0-0-1/2	jingyu1200-40 Lead；SR1101	STN	cross		1+	2-							145	70	1.8
		Yuan Changqian	2023-06-13	Male	56	PD	10	Jiangsu	2023-05-11	Tremor, end of dose, slight abnormal movement	Abnormal movement, end of the dose	No		Level 3	15050501332	2024-05-11	Medoba 3/4-3/4-3/4, Xi Ning 1/2-1/2-1/2, diphenhydroxysol 1-1-1, amantadine 1/2-1/2-1/2, Teshuda 1-1-1	Medoba1/2-1/2-1/2	jingyu1200-40 Lead；SR1101	STN		+		-							150	70	1.7		+		-							150	60	1.9
		Li Ming	2023-06-16	Male	37	PD	18	chekiang	2023-01-16	On-off, rigidity, peak dose abnormal movement, difficulty walking	Abnormal movement, switch	Yes	Yes	Level 1	13901924829	2024-01-16	Xi Ning 1-1-1, Medoba 1/2-1/2-1/2, amantadine, diphenhydroxysol 1-0-1, rotigotine 1-0-0	Xi Ning1-1-1，Medoba1/2-1/2-1/2，amantadine，diphenhydroxysol 1-0-1，rotigotine1-0-0	Pingchi.1200-40 Lead；SR1101	STN	cross	C+				4-					VFS	70	2	959	C+				8-					VFS	80	2.6	896
		Li Ming	2023-06-16	Male	37	PD	18	Anhui	2023-01-16	On-off, rigidity, peak dose abnormal movement, difficulty walking	Abnormal movement, switch	Yes	Yes	Level 1	13901924829	2024-01-16	Xi Ning 1-1-1, Medoba 1/2-1/2-1/2, amantadine 1-1-0, diphenhydroxysol 1-0-1, rotigotine 1-0-0	Xi Ning1-1-1，Medoba1/2-1/2-1/2，amantadine1-1-0，diphenhydroxysol 1-0-1，rotigotine1-0-0	Pingchi.1200-40 Lead；SR1101	STN	cross	C+		2-							VFS	60	1	1132	C+			6+	7-					VFS	80	2	719
		Zhang Weilin	2023-06-12	Male	59	PD	14	Jiangsu	2023-05-18	Slow, rigidity, end of dose (drug effect 3 hours)	Wearing off	Yes	Yes	Level 1	13706863583	2024-05-18	Medoba 3/4-3/4-3/4, Xi Ning 0-1/2-0, Teshuda 1-0-0, diphenhydroxysol 1/2-1/2-1/2, Daringfu 1-0-1, VitaminB6 1-1-1	Medoba3/4-3/4-3/4，Xi Ning0-1/2-0，Teshuda1-0-0，diphenhydroxysol 1/2-1/2-1/2，Daringfu1-0-1，VitaminB6 1-1-1	Medtronic, 3389S, RC	STN	monopole	C+		1-							120	60	1.5	1480	C+		9-							120	60	1.5	1413	Medtronic cross electrical pulse clinical trial
		Zhou Junli	2023-06-15	Female	54	PD	6	chekiang	2021-09-28	Left-sided abnormal movement, left hand dystonia, poor gait	Gene	No		Level 3	13916504042	2024-09-28	Medoba 1/2-1/2-1/2	Medoba1/2-1/2-1/2	Medtronic, 3389S, RC	STN		+			-						125	60	2.45	1176	+		-							125	80	1.9	1346
		Zhou Junli	2023-06-15	Female	54	PD	6	chekiang	2021-09-28	Left-sided abnormal movement, left hand dystonia, poor gait	Gene	No		Level 3	13916504042	2024-09-28	Medoba1/2-1/2-1/2	Medoba1/2-1/2-1/2	Medtronic, 3389S, RC	STN		+				-					125	70	3.2	1232	+				-					125	80	3.6	1218
		Zhu Qianjin	2023-05-15	Male	58	PD	8	chekiang	2023-05-15	Slow, rigidity, abnormal movement, end of dose	Abnormal movement, end of the dose	Yes	No	Level 3	15179484551	2024-05-15	Medoba1/2-1/2-1/2, Xi Ning1/2-1/2-1/2, Kedan1-1-1, amantadine1-0-1	Medoba1/2-1/2-1/2，Xi Ning1/2-1/2-1/2，Kedan1-1-1，amantadine1-0-1	Medtronic, 3389S, RC	STN	monopole	C+		1-							130	60	1.2	1982	C+		9-							130	60	1.2	1581
		肖存良	2023-05-23	Male	46	Dystonia	10months	Shanghai	2023-05-16	Whole body twisting (due to severe trembling)	-	No	No	Level 1	13501863246	2024-05-15	diphenhydroxysol 1/2-1/2-1/2, Clonazepam0-0-0-1/2	diphenhydroxysol 1/2-1/2-1/2，Clonazepam0-0-0-1/2	Medtronic, 3389S, RC	GPI		+	-								130	90	1.5	1346	+	-								130	90	1.5	990
		Peng Yijun	2023-06-05	Male	61	PD	11	Inner Mongolia	2023-05-04	Tremor, slowness, rigidity, wearing off, dyskinesia	Abnormal movement, end of the dose	Yes	Yes	Level 1	13915348696	2024-05-04	Daringfu1-1-1-1, Medoba1/2-1/2-1/2-1/2, Xi Ning0-0-0-1, Clonazepam0-0-0-1/2	Daringfu1-1-1-1，Medoba1/2-1/2-1/2-1/2，Xi Ning0-0-0-1，Clonazepam0-0-0-1/2	Medtronic, 3389S, RC	STN	monopole	C+		1-							130	60	1.9	1509	C+		9-							130	60	1.8	1263	Medtronic cross electrical pulse clinical trial
		Zhang Jumin	2023-06-06	Female	70	PD	13	Gansu	2023-05-11	Slow, stiff	-	Yes	No	Level 2	15067223927	2024-05-11	Medoba1/2-1/2-1/2-1/2, Prapexor (0.25mg) 1-1-1-1	Medoba1/2-1/2-1/2-1/2，Prapexor（0.25mg）1-1-1-1	Pingchi.1200-40 Lead；SR1101	STN	monopole	C+		2-							130	60	1.6	1273	C+		6-							130	60	1.7	1249
		Sun Fanghua	2023-06-06	Male	54	PD	14	Jiangsu	2023-05-10	-	-	Yes	No	Level 3	#VALUE!	2024-05-10	Medoba1/2-1/2-1/2-1/2, Prapexor (0.25mg) 1-1-1, Xi Ning (Silem) 1/2-1/2-1/2-1/2, amantadine1-1-0, Quetiapine0-0-0-1	Medoba1/2-1/2-1/2-1/2，Prapexor（0.25mg）1-1-1，Xi Ning（Silem）1/2-1/2-1/2-1/2，amantadine1-1-0，Quetiapine0-0-0-1	Pingchi.1200-40 Lead；SR1101	STN	monopole	C+		2-							130	60	1.7	1032	C+		6-							130	60	1.8	1054
		Zhang Chunlian	2023-06-06	Male	55	PD	20	Jiangsu	2023-05-09	Tremor, slow, rigidity, abnormal movement, end of dose	Abnormal movement, end of the dose	Yes	No	Level 1	15062836699	2024-05-09	Resa Gilan1-0-0, Medoba1/4-1/4-1/4-1/4, amantadine1-1-0, Xi Ning1/2-1/2-1/2-1/2, Antan1/4-1/4-1/4-1/4	Resa Gilan1-0-0，Medoba1/4-1/4-1/4-1/4，amantadine1-1-0，Xi Ning1/2-1/2-1/2-1/2，෩৆1/4-1/4-1/4-1/4	Pingchi.1200-40 Lead；SR1101	STN	monopole	C+		2-							130	60	1.5	1586	C+		6-							130	60	1.8	1561
		Ma Haojin	2023-06-09	Male	74	PD	20	Xiamen	No surgery was performed	-	-			Level 1	18057783260	2024-06-20																																Patient's family gave up surgery due to poor cognition, followed up on cognitive changes a year later as a control group
		Zheng Chunyao	2023-06-19	Male	74	PD	11	Xiamen	2023-05-19	Trembling, slow, rigidity, denying on-off abnormal movement	-	Yes	No	Level 2	13606799308	2024-06-19	Medoba1/2-1/2-1/2, Prapexor (0.25mg) 1-1-1	Medoba1/4-1/4-1/4	Medtronic, 3389S, RC	STN	monopole	C+		1-							140	60	2		C+		9-							140	60	2
		Zheng Xiaozhong	2023-06-28	Male	52	PD	15	Hunan	2023-05-26	Hallucinations, cognitive impairment, rigidity, abnormal movement, freezing	Abnormal movement, freezing, hallucinations	Yes	No	Level 2		2024-06-28	Medoba1/4-1/4-1/4, Teshuda1-1-1, Senforo (0.25mg) 1/2-1/2-1/2	Medoba1/4-1/4-1/4	Medtronic, 3389S, RC	STN	monopole	C+		1-							130	60	1.3		C+		9-							130	60	1.5
		Yu Meihong	2023-06-28	Female	74	PD	8	Jiangxi	2023-05-29	Slow, rigidity, unstable standing	-	Yes	No	Level 2	18221453107	2024-06-28	Medoba3/4-3/4-3/4, Clonazepam0-0-0-1/2	Medoba1/2-1/2-1/2	Medtronic, 3389S, RC	STN	monopole	C+			2-						140	60	1.8	1862	C+			10-						140	60	2.1	766
		Zhang Lihua	2023-06-28	Female	76	Meige	25	Jiangsu	2023-05-31	Difficulty opening eyes, corner of mouth twitching, left hand trembling	-	No	No	Level 1	13816843818	2024-06-28	No	No	Medtronic, 3389S, RC	GPI	monopole	C+	0-								130	60	1.8	864	C+	8-								130	60	1.8	1144
		Wang Hua	2023-06-28	Female	26	Dystonia	2	Gansu	2023-05-25	Head and trunk leaning backward, difficulty speaking, left hand stiffness, difficulty writing with right hand	-	No	No	Level 1	18609072169	2024-06-28	diphenhydroxysol (2mg) 1-1-1, Clonazepam1/2-1/2-1/2	diphenhydroxysol （2mg）1-1-1，Clonazepam1/2-1/2-1/2	jingyu1200-40 Lead；SR1101	GPI		+	-								130	90	1.8		+	-								130	90	1.8
		Zhang Guihua	2023-06-28	Female	56	PD	6	Jiangsu	2023-05-23	Slow, stiff, on-off	On-off	Yes	No	Level 2	13585403522	2024-06-28	Medoba1/2-1/2-1/2, Prapexor (0.25mg) 1-1-1, amantadine1-0-0, Clonazepam0-0-0-1/2	Medoba1/4-1/4-1/4，（increase if ineffective）Prapexor（0.25mg）1/2-1/2-1/2	jingyu1200-40 Lead；SR1101	STN	monopole	C+			2-						130	60	1.4		C+			6-						130	60	1.3
		Gu Zhangyang	2023-06-27	Male	18	Dystonia	10 months	Jiangsu	2022-12-09	-	Gene	No	No	Level 1	18921678268	2024-06-27	No	No	jingyu1200-40 Lead；SR1101	GPI		+		-							130	100	2.05		+		-							150	150	2
		Tian Bei	2023-06-29	Female	54	PD	14	Xiamen	2023-05-23	Trembling, slow, rigidity, walking and turning over difficulty, on-off, abnormal movement	On-off, dyskinesia	Yes	Yes	Level 1	13199234770（空号）	2024-06-29	Medoba1-3/4-3/4-3/4, Xi Ning1/2-0-0-1, Kedan1/2-1/2-1/2-1/2	Medoba1/4-1/4-1/4	Pingchi.1200-40 Lead；SR1101	STN	Cross electrical pulses				3+	4-					120	60	0.5	2680	C+		6-							120	70	2.9	1205
		Tian Bei	2023-06-29	Female	54	PD	14	Xiamen	2023-05-23	Trembling, slow, rigidity, walking and turning over difficulty, on-off, abnormal movement	On-off, dyskinesia	Yes	Yes	Level 1	13199234770	2024-06-29	Medoba1-3/4-3/4-3/4, Xi Ning1/2-0-0-1, Kedan1/2-1/2-1/2-1/2	Medoba1/4-1/4-1/4	Pingchi.1200-40 Lead；SR1101	STN															C+	5-								120	70	2.6	1382
		Xia Guangrong	2023-06-29	Female	68	PD	7	Hunan	2023-05-22	Slow, rigidity, abnormal posture of right lower limb, slurred speech, eyelid spasm	-	Yes	No	Level 2	15316807371	2024-06-29	Medoba 1-1-1, Xi Ning 1/2-0-1/2	Medoba1/2-1/2-1/2	Pingchi.1200-40 Lead；SR1101	STN	monopole	C+			3-						145	70	1.8	791	C+			7-						145	60	1.65	838
		Zhong Shengtao	2023-06-29	Male	66	PD	7	Jiangxi	2023-05-28	Slowness, rigidity	-	Yes	No	Level 2	13907075078	2024-06-29	Medoba 1/2-1/2-1/2, Slaiglan 1-1-0, amantadine 1-1-0, Vitamin B6 1-1-1	Medoba1/4-1/4-1/4	Pingchi.1200-40 Lead；SR1101	STN	monopole	C+		2-							130	60	1.3	1047	C+		6-							130	60	1.3	976
		Ni Xiaojie	2023-06-19	Male	31	Meige	3	Jiangsu	2023-05-07	Involuntary movements of eyes and mouth	-	No	No	Level 1	13912225693	2024-06-19	methylcobalamin 1-1-1	methylcobalamin1-1-1	jingyu1200-40 Lead；SR1101	GPI		+	-								130	60	1.5		+	-								130	60	1.5
		Chen Yaxian	2023-06-25	Female	72	PD	14	Jiangsu	No surgery was performed		Imaging, cognition	Yes	Yes	Level 1	18752816899	2025-06-25																																Patient's family gave up surgery due to poor cognition, followed up on cognitive changes a year later as a control group
		Zhuang Yonglan	2023-07-05	Female	69	PD	10	Jiangsu	2023-06-02	Trembling, slow, rigidity, fluctuation	-	Yes	No	Level 2	15366515071	2024-06-02	Medoba 1/2-1/2-1/2, Xi Ning 1-1-1, amantadine 1-0-1, Alolol 1-0-0	Medoba1/4-1/4-1/4	jingyu1200-40 Lead；SR1101	STN		+			-						130	70	2		+				-					190	70	2.1
		Zhu Canyu	2023-07-05	Male	73	ET	12	Shanghai	2023-06-04	Tremor	-	No	No	Level 1	13901884843	2024-06-04	Oxcarbazepine 150mg 1-0-1, Alolol 10mg 1-0-1, Metoprolol 25mg 1-0-0, Pregabalin 75mg	Oxcarbazepine150mg1-0-1，Metoprolol25mg1-0-0	Medtronic, 3389S, RC	VIM-PSA		+	-								130	60	1.7	1407	+	-								130	60	1.7	1584
		Zhou Chen	2023-07-05	Female	41	PD	8	Fujian	2023-06-01	Slow, rigidity, fluctuation	Gene	Yes	Yes	Level 1	13600990508	2024-06-01	Medoba 1/2-1/2-1/2-1/2, Xi Ning 1/2-1/2-1/2-1/2, Senforo (0.25mg) 1-1-1-1, amantadine 1-1-1, diphenhydroxysol 1/2-1/2-1/2, Clozapine 0-0-0-1/4	Medoba1/4-1/4-1/4，Senforo（0.25mg）1-1-1	Medtronic, 3389S, RC	STN		+		-							145	70	2.1	855	+			-						145	70	2.35	1175	Medtronic cross electrical pulse clinical trial
		Ye Zaizu	2023-07-06	Male	51	PD	18	chekiang	2023-06-08	Stiffness and pain in both lower limbs, general weakness, fluctuation, abnormal movement	Dyskinesia	Yes	Yes	Level 1	13515771887	2024-06-08	Medoba 1/4-1/4-1/4-1/4-1/4-1/4, Xi Ning 1/2-1/2-1/2-1/2-1/2-1/2, Kedan 1/2-1/2-1/2-1/2-1/2-1/2, Clozapine 1/2-0-1/2	Medoba1/4-1/4-1/4	jingyu1200-40 Lead；SR1101	STN		+R181+S18				-					130	60	1.6		+				-					130	60	1.7
		Ye Zaizu	2023-07-06	Male	51	PD	18	chekiang	2023-06-08	Stiffness and pain in both lower limbs, general weakness, fluctuation, abnormal movement	Dyskinesia	Yes	Yes	Level 1	13515771887	2024-06-08	Medoba 1/4-1/4-1/4-1/4-1/4-1/4, Xi Ning 1/2-1/2-1/2-1/2-1/2-1/2, Kedan 1/2-1/2-1/2-1/2-1/2-1/2, Clozapine 1/2-0-1/2	Medoba1/4-1/4-1/4	jingyu1200-40 Lead；SR1101	STN		+			-						130	60	1.9		+			-						130	60	2.2
		Ge Naiyong	2023-07-06	Male	69	PD	14	Shanghai	2023-06-06	Trembling, slow, stiff, memory decline, occasional fluctuation	-	Yes	No	Level 2	13816741535	2024-06-06	Medoba 3/4-3/4-3/4, Xi Ning 1/2-1/2-1/2, Prapexor (0.25mg) 1-1-1, Slaiglan 1-1-0, Vitamin B6 1-1-1	Medoba1/2-1/2-1/2	Pingchi.1200-40 Lead；SR1101	STN		+			-						130	60	1.6		+		-							130	60	2
		Mao Aihua	2023-07-06	Female	60	PD	7	Wenzhou	2023-06-06	Slow, stiff, end of the dose, speech is low	Wearing off	Yes	No	Level 2	13868695311	2024-06-06	Medoba 3/4-3/4-3/4, Xi Ning 0-0-0-3/2, Prapexor (0.25mg) 1-1-1	Medoba1/2-1/2-1/2	Pingchi.1200-40 Lead；SR1101	STN		+		-							130	60	2.25		+		-							130	70	2.2
		Zhang Changchun	2023-07-10	Male	71	ET	3	Shanghai	2023-06-09	Trembling in handwriting, both hands, head, slight action tremor in left hand	-	No	No	Level 1	13166129912	2024-06-09	methylcobalamin 1-1-1	methylcobalamin1-1-1	Medtronic, 3389S, RC	VIM-PSA		+	-								130	60	1.5	1161	+	-								130	60	1.5	1260
		Chen Nianxiang	2023-07-10	Male	73	PD	12	Shanghai	2023-06-12	Tremor, slow, stiff	-	Yes	No	Level 2	13818686108	2024-06-12	Medoba 5/4-5/4-5/4, Teshuda 1-0-1	Medoba5/4-5/4-5/4,Teshuda1-0-1	Medtronic, 3389S, RC	STN		+		-							130	70	2.2	1885	+		-							130	60	2	872
		Lü Caikang	2023-07-13	Male	64	PD	8	Jiangsu	2023-06-15	Slow, stiff, fluctuation, abnormal movement (on phase)	Dyskinesia	Yes	Yes	Level 1	13812019593	2024-06-15	Medoba 1/4-1/4-1/4-1/4-1/4, Silem 5/4-5/4-5/4-5/4-5/4	Medoba1/2-1/2-1/2，Clozapine	jingyu1200-40 Lead；SR1101	STN		+		-							130	60	1.4		+		-							130	60	1
		Pan Shuhua	2023-07-17	Female	58	PD	4	Jiangsu	2023-06-20	Trembling, slow, stiff, fluctuation	Fluctuation	Yes	Yes	Level 1	13605119016	2024-06-20	Medoba1/2-3/4-3/4-3/4-1/2, Kedan1/2-1/2-1/2-1/2-1/2, Xi Ning1/2-1/2-1/2-1/2-1/2, Senforo (0.25mg) 2-2-2-2-2, amantadine 1-1-1, VitaminB6 1-1-1	Medoba1/2-1/2-1/2	Medtronic, 3389S, RC	STN		+		-							130	60	2	1250	+		-							130	60	2.4	1706
		Jiang Zhixin	2023-07-17	Male	63	Meige	3	chekiang	2023-06-19	Eyelid spasm, involuntary movements around the mouth	-	No	No	Level 1	18157671832	2024-06-19	Baclofen 1-1-1	Baclofen1-1-1	jingyu1200-40 Lead；SR1101	STN		+				-					130	60	1.4		+				-					130	60	1.6
		Sun Yong	2023-07-20	Male	60	PD	7	Jiangsu	2018-08-01	Medication ineffective, parameters are also poor	-	No	No	Level 3	15852213591	-	Medoba 3/2-3/2-3/2-3/2, Estazolam 0-0-0-1	Medoba 3/2-3/2-3/2-3/2，Estazolam0-0-0-1	Pingchi.1200-40 Lead；SR1101	STN		+	-								135	80	2.8	1577	+		-							135	90	3	919
		Sun Yong	2023-07-20	Male	60	PD	7	Jiangsu	2018-08-01	Medication ineffective, parameters are also poor	-	No	No	Level 3	15852213591	-	Medoba 3/2-3/2-3/2-3/2, Estazolam 0-0-0-1	Medoba 3/2-3/2-3/2-3/2，Estazolam0-0-0-1	Pingchi.1200-40 Lead；SR1101	STN		+			-						135	60	2.9	1440	+	-								135	80	3.05	1050
		Zhong Shengtao	2023-06-29	Male	66	PD	8	Jiangxi	2023-06-02	Whole body discomfort at night, feeling of insect bites, discomfort in the precordial area, hallucinations	-	Yes	No	Level 2	13907075078	2024-06-02	Medoba 1/4-1/4-1/4	Medoba1/4-1/4-1/4-1/4，Prapexor0.25mg qN，Clozapine 3/4tabletsqN，Pregabalin 75mg qN，Clonazepam1/2tabletsqN	Pingchi.1200-40 Lead；SR1101	STN		+			-						130	60	1.4	964	+			-						130	70	2.4	854
		Jiang Youyi	2023-07-24	Female	67	PD	12	Shanghai	2023-06-29	Freezing, tremor (more pronounced on the left), slow, stiff	Freezing	Yes	No	Level 1	13901755090	2024-06-29	Xi Ning 1-1-1, amantadine 1-0-1	Xi Ning1/2-1/2-1/2，VitaminB61-1-1	jingyu1200-40 Lead；SR1101	STN		+			-						130	60	1.6		+			-						180	60	1.7
		Jiang Youyi	2023-07-24	Female	67	PD	12	Shanghai	2023-06-29	Freezing, tremor (more pronounced on the left), slow, stiff	Freezing	Yes	No	Level 1	13901755090	2024-06-29	Xi Ning 1-1-1, amantadine 1-0-1	Xi Ning1/2-1/2-1/2，VitaminB61-1-1	jingyu1200-40 Lead；SR1101	STN																			-					180	60	2
		Wu Xiulian	2023-07-24	Female	58	PD	8	chekiang	2023-06-30	-	-	Yes	No	Level 3	15105858732	2024-06-30	Kedan 1-1-1-1, Medoba 1/4-1/4-1/4-1/4, Slaiglan 1-0-0, Senforo (0.25mg) 2-2-2, amantadine 1/2-0-1/2	Medoba1/4-1/4-1/4	Medtronic, 3389S, RC	STN		+		-							130	60	1.7	1393			-	+						130	60	1.8	1778	Medtronic cross electrical pulse clinical trial
		Li Weikang	2023-07-25	Female	37	PD	23	Shanghai	2023-07-07	Trembling, slow, stiff, abnormal movement, on/off phenomenon	Abnormal movement, switch	Yes	No	Level 1	13513805210	2024-07-07	Medoba 1/2-1/2-1/2-1/2-1/2-1/2, Xi Ning 0-0-0-1/2, Resa Gilan 1-0-0, Clozapine 0-0-0-1, Clonazepam 0-0-0-1	-	Medtronic, 3389S, RC	STN				-	+						125	70	3.3	1330				+	-					125	70	2.1	1073	Medtronic cross electrical pulse clinical trial
		Li Weikang	2023-07-25	Female	37	PD	23	Shanghai	2023-07-07	Trembling, slow, stiff, abnormal movement, on/off phenomenon	Abnormal movement, switch	Yes	No	Level 1	13513805210	2024-07-07	Medoba 1/2-1/2-1/2-1/2-1/2-1/2, Xi Ning 0-0-0-1/2, Resa Gilan 1-0-0, Clozapine 0-0-0-1, Clonazepam 0-0-0-1	-	Medtronic, 3389S, RC	STN					+	-					125	70	2	1521			-	+						125	70	3.2	1185	Medtronic cross electrical pulse clinical trial
		Zhang Aichai	2023-07-26	Female	60	PD	8	chekiang	2023-06-27	Slow, stiff, unstable walking	-	Yes	Yes	Level 1	13605779660	2024-06-27	Medoba 1/2-1/2-1/2-1/2, Xi Ning 1-1-1-1, amantadine 1-1-0, VitaminB6 1-1-1, Zuo Luo Fu 0-0-0-1	Medoba1/4-1/4-1/4	Pingchi.1200-40 Lead；SR1101	STN		+			-						130	60	1.5	1450	+		-							130	70	1.95	1417
		Jiang Jiamei	2023-07-27	Female	25	全身型肌张力障碍（TD相关）	6months	chekiang	2023-06-29	Whole body involuntary movements, difficulty walking	-	No	No	Level 1	15888666473	2024-06-29	Aripiprazole 0-0-0-1/2, Clonazepam 0-0-0-1/4	Aripiprazole0-0-0-1/2，Clonazepam0-0-0-1/4	jingyu1200-40 Lead；SR1101	GPI		+	-								130	80	1.2		+	-								130	80	1.4
		卢海滨	2023-07-26	Male	64	PD	13	Fujian	2020-11-12	Unstable, walking becomes worse	Unsteady, walking worse	No	No	Level 3	13459781131	-		Medoba1/4-1/4-1/4，amantadine1-0-1	Medtronic, 3389S, RC	STN		+		-							125	70	2.5	992	+	-								125	80	3.5	909
		卢海滨	2023-07-26	Male	64	PD	13	Fujian	2020-11-12	Unstable, walking becomes worse	Unsteady, walking worse	No	No	Level 3	13459781131	-		Medoba1/4-1/4-1/4，amantadine1-0-1	Medtronic, 3389S, RC	STN		+				-					125	60	2.8	837	+			-						125	60	3.5	983
		Zhou Chen	2023-07-26	Female	40	PD	8	Fujian	2023-06-01	Sleep is poor, effect is not good	Gene	Yes	Yes	Level 1	13600990508	2024-06-01	Medopa 1/2 tablets qid - Five times a day, Xi Ning 1/2 tablets qid - Five times a day, diphenhydroxysol 1/2 tablets bid, Prapexor 0.25mg qN, Midojun 1 tablet qd	Medopa1/4tabletstid，Prapexor0.25mg qN，Discretionaryamantadine1tabletsbidorClozapine1/2tabletsqN	Medtronic, 3389S, RC	STN		+			-						150	70	2.9	958	+			-						150	80	2.9	1071
		Cai Meili	2023-08-02	Female	69	PD	10	Fujian	2021-05-13	Dragging steps with both lower limbs, right side decline, starting freezing unstable, sometimes lighter	Freezing, unsteady	No	No	Level 3	18606968877	-		Medopa1/4tabletstid	Pingchi.1200-40 Lead；SR1101	STN		+		-							145	80	2.7	763	+		-							145	60	2.2	797
		Cai Meili	2023-08-02	Female	69	PD	10	Fujian	2021-05-13	Dragging steps with both lower limbs, right side decline, starting freezing unstable, sometimes lighter	Freezing, unsteady	No	No	Level 3	18606968877	-		Medopa1/4tabletstid	Pingchi.1200-40 Lead；SR1101	STN		+			-						145	80	3	763	+			-						145	80	2.8	841
		Chen Qinglong	2023-08-03	Male	52	PD	6	Wenzhou	2021-08-26	Feeling weak after long walking time, speech is slurred during off period	-	No	No	Level 3	13606779815	-		Medopa1/2tabletstid	jingyu1200-40 Lead；SR1101	STN		+			-						145	90	3.8		+		-							130	70	1.9
		Chen Qinglong	2023-08-03	Male	52	PD	6	Wenzhou	2021-08-26	Feeling weak after long walking time, speech is slurred during off period	-	No	No	Level 3	13606779815	-		Medopa1/2tabletstid	jingyu1200-40 Lead；SR1101	STN		+		-							145	90	3.2
		Luo Bo	2023-08-03	Female	57	Dystonia	2	Jiangsu	2023-07-04	Trunk leaning forward, left lower limb walking with inversion	Gene	Yes	Yes	Level 1	18914902809	2024-07-04	Clonazepam 0-0-0-1/2	Clonazepam0-0-0-1/2	jingyu1200-40 Lead；SR1101	GPI		+	-								130	80	1.5		+	-								130	80	1.7
		Zhu Laxiu	2023-08-07	Female	72	PD	11	Jiangsu	2023-07-06	Tremor, slow, stiff	-	Yes	No	Level 2	13501859902	2024-07-06	Medoba 1/2-1/2-1/2, Xi Ning 1/2-1/2-1/2-1/2	Medoba1/4tabletstid	Medtronic, 3389S, RC	STN					+	-					130	70	2.5	1084				+	-					130	60	2	1292
		Yang Donglian	2023-08-07	Female	52	Dystonia	2	Anhui	2023-07-10	Teeth grinding, phlegm in throat, slight cough	-	No	No	Level 1	15256568268	2024-07-10	methylcobalamin 1-1-1	methylcobalamin1-1-1	jingyu1200-40 Lead；SR1101	STN		+				-					130	60	1.6		+				-					130	60	1.8
		Cui Huaizhen	2023-08-08	Female	66	PD	5	Jiangsu	2023-07-07	Hypokinesia, rigidity, fluctuation	Cognition, functional imaging	Yes	Yes	Level 1	13921924081	2024/7/7 (Focus on cognition during follow-up, & review PET CT)	Medoba 1/4-1/4-1/4-1/4, Xi Ning 1/2-1/2-1/2-1/2, Prapexor (0.25mg) 1-0-1, amantadine 1-1-1, diphenhydroxysol 1-1-1, Clozapine 1-1-2-1/2	Medoba1/4-1/4-1/4	jingyu1200-40 Lead；SR1101	STN		+		-							140	70	1.9		+		-							140	70	2.4
		Chen Yinhua	2023-08-08	Female	69	ET	11	Jiangsu	2023-07-06	Tremor	Gene	No	No	Level 1	15862695861	2024-07-06	Clonazepam 1/4-0-1/4, Almar 1/2-0-0	Clonazepam1/4-0-1/4，Almar1/2-0-0	Medtronic, 3389S, RC	VIM-PSA		+		-							130	60	1.5	1120	+		-							130	60	1.5	1174	0- and 8- resistances are extremely high, unused and untested
		Shen Guixiang	2023-08-10	Female	52	PD	10	Jiangsu	2023-07-13	Slow, stiff, end of the dose, occasional abnormal movement	End-of-dose, dyskinesia	Yes	Yes	Level 1	15152604255	2024-07-13	Medoba 1/2-1/2-1/2-1/2-1/2, Xi Ning 1-1-1-1, Kedan 1/2-1/2-1/2, Clozapine 0-0-0-1/2, Memantine Hydrochloride 1-0-1, Quetiapine 0-2-0	Medoba1/2tablets tid	jingyu1200-40 Lead；SR1101	STN				-	+						130	70	2.4				-	+						130	60	2
		Guan Junshen	2023-08-10	Male	59	PD	12	Jiangsu	2023-07-11	Trembling, slow, stiff, fluctuation, slight abnormal movement, freezing (on/off phenomenon)	Fluctuation, abnormal movement, freezing	Yes	No	Level 2	15706288385	2024-07-11	Medoba 3/4-3/4-3/4-3/4, Xi Ning 1/2-1/2-1/2-1/2, rotigotine (6mg) 1-0-0, Resa Gilan 1-0-0, amantadine 3/2-3/2-0, diphenhydroxysol 1/2-1/2-1/2-1/2, Vitamin B6 1-1-1, Clozapine 3/4-3/4-1	Medoba1/4-1/4-1/4	Medtronic, 3389S, RC	STN		+		-							130	80	2.7	1574	+		-							130	60	2	1034
		Wang Bo	2023-08-15	Female	20	继发性dystonia	2	Jiangsu	2022-08-18	After the last adjustment, limb movement improved, enlargement occurred, swallowing difficulty cannot be changed, eating liquid, semi-liquid, food is poor	-	No	No	Level 1	15961283712	2024-08-18	No	risperidone（0.25mg）0-0-0-1，Clonazepam（1mg）0-0-0-1	Medtronic, 3389S, RC	GPI		+		-							105	240	2.3MA	1237	+	-								105	180	2.5MA	1189
		Zhou Yu	2023-08-14	Female	21	Dystonia	1	Anhui	2023-07-14	-	-	No	No	Level 1	13764584757	2024-07-15	No	No	jingyu1200-40 Lead；SR1101	GPI		+	-								130	90	1.7		+	-								130	90	1.8
		Chen Jiao	2023-08-15	Female	69	PD	6	chekiang	2023-07-14	Slow, stiff, neck hyperextension, on-off, Abnormal movement	On-off, dyskinesia	Yes	No	Level 2	18906881032	2024-07-15	Medoba 3/4-3/4-3/4-3/4, Xi Ning 3/4-3/4-3/4-3/4, Teshuda 1-1-1, Resa Gilan 1-0-0, amantadine 1/2-1/2-1/2, Antan 1/2-1/2-0	Medoba 1/2tablets tid，amantadine1/2-1/2-1/2	jingyu1200-40 Lead；SR1101	STN		+		-							140	70	2.5		+		-							130	70	1.8
		Chen Jiao	2023-08-15	Female	69	PD	6	chekiang	2023-07-14	Slow, stiff, neck hyperextension, on-off, Abnormal movement	On-off, dyskinesia	Yes	No	Level 2	18906881032	2024-07-15	Medoba 3/4-3/4-3/4-3/4, Xi Ning 3/4-3/4-3/4-3/4, Teshuda 1-1-1, Resa Gilan 1-0-0, amantadine 1/2-1/2-1/2, Antan 1/2-1/2-0	Medoba 1/2tablets tid，amantadine1/2-1/2-1/2	jingyu1200-40 Lead；SR1101	STN		+			-						140	70	2.2
		Lu Xiuchun		Male	63	PD	17	chekiang	2023-08-17	-	-	Yes	Yes	Level 1	13738732580	2023-09-17	No	No	Pingchi.1200-40 Lead；SR1101	STN															+				-					150	90	2.5		Admitted for unilateral electrode programming from another hospital, but the effect was poor. After adjusting the parameters, the body tilted to the left and the left lower limb became numb
		Zhang Jinxing	Zhang Jinxing	Male	57	Dystonia	30	chekiang	2023-07-17	Spasmodic torticollis, head tilted to the right	-	No	No	Level 1	13676859271	2024-07-15	No	No	Medtronic, 3389S, RC	GPI		+	-								130	90	1.6	1367	+	-								130	90	1.6	1580
		Hu Jing	Hu Jing	Female	68	Meige	10	Shanghai	2023-07-21	Eyelid spasm	-	No	No	Level 1	18618417646	2024-07-21	No	No	Medtronic, 3389S, RC	STN		+				-					130	60	1.7	1888	+				-					130	60	1.7	1080
		Zhao Zixuan	Zhao Zixuan	Male	9	Hereditary systemic dystonia	2	Jiangsu	2023-07-18	Superior cerebellar peduncle	-	Yes	No	Level 1	18724187682	2024-07-18	Medoba 1/4-0-1/4, Baclofen 1-0-1, diphenhydroxysol 3-0-3	Medoba1/4-0-1/4，Baclofen1-0-1，diphenhydroxysol 3-0-3	Jing Yu1242-s Lead；SR1101	The cerebellum is pierced with a dentate nucleus		+		-							130	90	1.8		+		-							130	90	1.6
		Dong Xialian	Dong Xialian	Female	58	Meige	1	Jiangsu	2023-07-21	-	-	No	No	Level 1	13739111058	2024-07-21	diphenhydroxysol 1-0-0 or 1-0-1, Clonazepam (2mg) 0-0-0-1	diphenhydroxysol 1-0-0or1-0-1，Clonazepam（2mg）0-0-0-1	jingyu1200-40 Lead；SR1101	STN		+				-					130	60	1.5		+				-					130	60	1.5
		Zhou Jianbo	Zhou Jianbo	Male	49	PD	8	chekiang	2023-07-24	Slow, stiff, undulating	Fluctuation	No	No	Level 3	15168129871	2024-07-24	Medoba 3/4-3/4-3/4, Xi Ning 1/2-1/2-1/2, Senforo (0.25mg) 1-1-1	Medoba1/4-1/4-1/4	Medtronic, 3389S, RC	STN	Slow onset of action, stimulation induced abnormalities	+				-					125	60	1.2	1929	+				-					125	60	1	1560
		Zhou Jianbo	Zhou Jianbo	Male	49	PD	8	chekiang	2023-07-24	Slow, stiff, undulating	Fluctuation	No	No	Level 3	15168129871	2024-07-24	Medoba 3/4-3/4-3/4, Xi Ning 1/2-1/2-1/2, Senforo (0.25mg) 1-1-1	Medoba1/4-1/4-1/4	Medtronic, 3389S, RC	STN	Slow onset of action, stimulation induced abnormalities			+	-						125	60	1.8	1782	+		-							125	60	1.9	1479
		Come to Fengxia	Lai Fengxia	Female	63	PD	13	Jiangsu	2023-07-24	Trembling, slow, stiff, undulating	Fluctuation	Yes	No	Level 2	13851205188	2024-07-24	Medoba 1/2-1/2-1/2-1/2-1/2-1/2, Senforo (0.25mg) 1-0-1 or 1-1-1, Xi Ning 1/2-0-1/2	Medoba 1/2tablets tid	jingyu1200-40 Lead；SR1101	STN		+		-							130	70	2.3		+		-							130	60	1.8
		Yu Miaolin	Yu Miaolin	Male	65	ET	6	chekiang	2023-07-24	Hands trembling, trembling in front of chest, more pronounced on the right	-	No	No	Level 1	13758192825	2024-07-24	No	No	Medtronic, 3387S, RC	VIM-PSA		+	-								150	70	2		+	-								150	60	1.8
		Zhang Guojuan	Zhang Guojuan	Female	73	PD	12	Shanghai	2023-07-25	Tremor, slow, stiff	Tremor, slow, stiff	Yes	Yes	Level 1	13601946669	2024-07-25	Medoba 3/4-3/4-3/4, Xi Ning 0-0-0-1	Medoba1/2-1/2-1/2	jingyu1200-40 Lead；SR1101	STN		+		-							130	60	1.4		+		-							130	70	2.1
		Wan Zhiming	Wan Zhiming	Male	35	Red core tremor	2.5	Jiangxi	2023-08-15	-	-	Yes	Yes	Level 1	18870912089	2024-08-15	No	No	(Parameters need to be confirmed）jingyu1200-40 Lead；SR1101	VIM-PSA			-	+							130	60	1.2			-	+							180	60	1.8
		Jiang Guilan	Jiang Guilan	Female	70	PD	13	Jiangsu	2023-07-30	Stiffness, freezing, Abnormal movement	Freezing, dyskinesia	No	No	Level 3	18360076369	2024-08-28	Medoba 1/4-1/4-1/4-1/4, Xi Ning 1/2-1/2-1/2-1/2, Prapexor (0.75mg) 0-0-0-1	Medoba1/2tablets tid，Prapexor0.75mg qN	Pingchi.1200-40 Lead；SR1101	STN		+			3-						110	60	1		+			-						110	60	1.65		Annual follow-up
		Gu Xiaoping	Gu Xiaoping	Male	66	PD	8	Jiangxi	2023-07-28	Trembling (right upper limb + jaw)	-	No	No	Level 3	13807097431	2024-08-28	Medoba 3/4-3/4-3/4, Senforo (0.25mg) 2-2-2	Medoba 1/2tablets tid	jingyu1200-40 Lead；SR1101	STN		+		1-							160	60	2		+		1-							160	60	1
		Du Development	Du Development	Male	72	PD	16	Jiangsu	2023-07-27	Trembling, slow, stiff, undulating	Fluctuation	Yes	Yes	Level 1	15861701463	2024-08-04	Medoba 5/4-5/4-5/4-1, Ntakapong 1/2-1/2-1/2, Vitamin B6 1-1-1	Medoba1/4-1/4-1/4	jingyu1200-40 Lead；SR1101	STN				-	+						150	70	3					-	+					140	60	2.2
		Du Development	Du Development	Male	72	PD	16	Jiangsu	2023-07-27	Trembling, slow, stiff, undulating	Fluctuation	Yes	Yes	Level 1	15861701463	2024-09-04	Medoba 5/4-5/4-5/4-1, Ntakapong 1/2-1/2-1/2, Vitamin B6 1-1-1	Medoba1/4-1/4-1/4	jingyu1200-40 Lead；SR1101	STN		+				-					150	70	2		+				-					140	70	2.2
		The land and sea are flat	The land and sea are flat	Male	64	PD	15	Anhui	2023-08-03	Trembling, slow, stiff, freezing, Abnormal movement	Freezing, dyskinesia	Yes	Yes	Level 1	13965988583	2024-09-06	Medoba 1/2-1/2-1/2, Resa Gilan 1-0-0, amantadine 1-0-1, diphenhydroxysol 1/2-0-1/2	Medoba1/4-1/4-1/4	Pingchi.1200-40 Lead；SR1101	STN		+		-							160	60	2.1		+		-							160	60	2.2
		The land and sea are flat	The land and sea are flat	Male	64	PD	15	Anhui	2023-08-03	Trembling, slow, stiff, freezing, Abnormal movement	Freezing, dyskinesia	Yes	Yes	Level 1	13965988583	2024-09-06	Medoba 1/2-1/2-1/2, Resa Gilan 1-0-0, amantadine 1-0-1, diphenhydroxysol 1/2-0-1/2	Medoba1/4-1/4-1/4	Pingchi.1200-40 Lead；SR1101	STN		+				-					160	60	2
		Lü Guiping	Lü Guiping	Female	71	PD	11	Xinjiang	2023-07-28	Slow stiffness, undulating	Slow and stiff, fluctuation	Yes	Yes	Level 3	13585706332	2024-09-05	Medoba 1/4-1/4-1/4, Xi Ning 1-1-1-1, Kedan 1/4-1/4-1/4, Senforo (0.25mg) 0-0-0-3, amantadine 1-1-0	Medoba1/4-1/4-1/4➡️1/2-1/2-1/2	Medtronic, 3389S, RC	STN		+			-						130	70	2.1	877	+		-							130	70	2	890	Postoperative seizures occurred twice
		Wang Xueming	Wang Xueming	Male	66	PD	5	Hangzhou	2023-07-01	Slow, stiff	-	No	No	Level 3	15899223891	2024-09-06	Medoba 0-1-0, Xi Ning 1-1-1, Senforo (0.75mg) 1-0-0	Medoba0-1-0，Xi Ning1-1-1	Medtronic, 3389S, RC	STN		+			-						120	80	4	1038	+			-						120	80	3.2	1084
		Chen Yuexin	Chen Yuexin	Female	76	PD	6	Shanghai	2023-08-07	Slow, stiff	-	Yes	No	Level 1	15221356850	2024-09-06	Medoba 1/2-1/2-1/2-1/2-1/2-1/2	Medoba1/2-1/2-1/2-1/2-1/2-1/2	Medtronic, 3389S, RC	STN		+		-							130	60	1.4	1382	+		-							130	60	1.5	1645
		Poplar spring	Poplar spring	Male	69	PD	8	Jiangsu	2023-08-09	Trembling, slow, stiff, undulating	Fluctuation	Yes	No	Level 2	15961957856	2024-09-07	Medoba1-1-1, Xi Ning1-0-0, Slaiglan1-1-0, methylcobalamin1-1-1	Medoba1/2-1/2-1/2→Medoba1-1-1	Pingchi.1200-40 Lead；SR1101	STN				+	-						130	60	1.5	760	+		-							130	60	1.5	818
		Poplar spring	Poplar spring	Male	69	PD	8	Jiangsu	2023-08-09	Trembling, slow, stiff, undulating	Fluctuation	Yes	No	Level 2	15961957856	2024-09-07	Medoba1-1-1, Xi Ning1-0-0, Slaiglan1-1-0, methylcobalamin1-1-1	Medoba1/2-1/2-1/2→Medoba1-1-1	Pingchi.1200-40 Lead；SR1101	STN		+				-					130	60	1.9	891
		Bai Keqin	Bai Keqin	Male	76	PD	5	Xinjiang	2023-08-07	Trembling, slow, stiff, undulating, Abnormal movement	Fluctuation, Abnormal movement	Yes	No	Level 3	15802127358	2024-09-07	Medoba1/2-1/2-1/2, Ntakapong1-1-1, Prapexor (0.25mg) 0-0-0-1	Medoba1/4-1/4-1/4	Medtronic, 3389S, RC	STN		+		-							125	60	1.7	1033			+	-						125	60	1.1	1362
		Bai Keqin	Bai Keqin	Male	76	PD	5	Xinjiang	2023-08-07	Trembling, slow, stiff, undulating, Abnormal movement	Fluctuation, Abnormal movement	Yes	No	Level 3	15802127358	2024-09-07	Medoba1/2-1/2-1/2, Ntakapong1-1-1, Prapexor (0.25mg) 0-0-0-1	Medoba1/4-1/4-1/4	Medtronic, 3389S, RC	STN																		+	-					125	60	1.5	1414
		Dai Zirong	Dai Zirong	Male	58	PD	10	chekiang	2023-08-08	Slow, stiff	-	Yes	No	Level 2	13336600628	2024-09-11	Xi Ning1/2-1/2-1/2-1/2, Medoba3/4-3/4-3/4-3/4, Senforo (1mg) 1-1-1, amantadine1-1-0	Medoba1/2-1/2-1/2	Medtronic, 3389S, RC	STN		+		-							130	70	2.4	1798	+		-							130	70	2.55	1171
		Zhong Chunfeng	Zhong Chunfeng	Female	58	PD	10	Jiangsu	2023-08-07	Trembling, slow, stiff, undulating, Abnormal movement	Fluctuation, Abnormal movement	Yes	No	Level 2	18751829783	2024-09-12	Medoba1/4-1/4-1/4-1/4, Daringfu1-1-1-1, Prapexor (0.75mg) 1-0-0, amantadine1-0-0, Slaiglan1-0-0, VitaminB6 1-1-1-1	Medoba1/4-1/4-1/4	Pingchi.1200-40 Lead；SR1101	STN		+		-							130	70	1.55		+		-							130	70	1.65
		Shen Huancheng	Shen Huancheng	Male	43	PD	7	chekiang	2023-08-10	Tremor, slow, stiff	-	Yes	Yes	Level 1	13968303498	2024-09-12	Medoba1/2-1/2-1/2-1/2, Senforo (0.25mg) 1-1-1-1, Atan 1/2-1/2-1/2-1/2, VitaminB6 1-1-1, Rothigottin (4mg) 1-1-0	Medoba1/4-1/4-1/4	Pingchi.1200-40 Lead；SR1101	STN		+		-							130	60	1.5	944	+		-							130	70	2.3	906
		Xiao Jiazeng	Xiao Jiazeng	Male	39	PD	15	Jiangsu	2023-08-18	Freezing, stiffness, forward lurching, falling	Freezing	Yes	No	Level 2	15895069076	2024-09-13	Xi Ning1/2-1/2-1/2-1/2, Prapexor (0.25mg) 1-1-1-1	Medopa 1/4-1/4-1/4	Medtronic, 3389S, RC	STN		+		-							150	70	2	1235	+			-						150	70	2	1223
		Zhang Qin	Zhang Qin	Female	72	PD	9	Shanghai	2021-01-01	Hospital assessment for possible right-sided Gpi-DBS	-	No	Yes	Level 3	18964959013	2024-09-07	No	Medoba1/2-0-0，Xi Ning1/2-1/2-1，Senforo（0.25mg）0-0-0-1，amantadine1-1-1，Clozapine1/4tabletsqN	Pingchi.1200-40 Lead；SR1101	STN		+		-							150	90	3	800	+									150	50	2.3	924
		Hou Dongmei	Hou Dongmei	Female	49	PD	10	Guangxi	2023-08-21	Slow, stiff, end of the dose, Abnormal movement	End-of-dose, dyskinesia	Yes	No	Level 2	18176332623	2024-08-21	Medoba1/2-1/2-1/2	Medoba1/4-1/4-1/4	jingyu1200-40 Lead；SR1101	STN		+			-						130	60	2		+		-							130	60	1.7
		Xu Shufang	Xu Shufang	Female	61	PD	12	Jiangsu	2023-08-17	Trembling, slow, stiff, undulating	Fluctuation	Yes	No	Level 2	13761148563	2024-08-17	Medoba1/4-0-0, amantadine1-0-0, diphenhydroxysol 1-0-0, Vitaminb6 1-0-0	Medoba1/4tabletstid	Pingchi.1200-40 Lead；SR1101	STN		+									130	60	1.5		+									130	60	1.65
		Lu Xiuchun	Lu Xiuchun	Male	63	PD	17	chekiang	2023-08-17	Trembling, slow, stiff, undulating	Fluctuation	Yes	Yes	Level 1	13957752989	2024-08-17	Medoba 1/2-1/4-1/2-1/4, Xi Ning1/2-1/2-1/2-1/2-1/2-1/2, Teshuda1-0-1	Medoba1/4tabletstid	Pingchi.1200-40 Lead；SR1101	STN		+		-							130	70	2.5					+	-					130	40	0.2
		Ruan Dongying	Ruan Dongying	Female	61	Meige	6	Hubei	2023-08-23	-	-	No	No	Level 1	15374588301	2024-08-23	methylcobalamin1-1-1	methylcobalamin1-1-1	jingyu1200-40 Lead；SR1101	GPI		+	-								130	60	1.6		+	-								130	60	1.6
		Ye Hanqing	Ye Hanqing	Male	71	PD	20	chekiang	2023-08-01	Trembling, slow, stiff, end of the dose, poor balance	Wearing off	Yes	Yes	Level 1	13858896006	2024-08-01	Medoba1-1-1-1	Medoba1/2tabletstid	jingyu1200-40 Lead；SR1101	STN		+		-							130	60	1.8		+		-							130	60	1.8
		Yao Lihua	Yao Lihua	Male	73	PD	10	Sichuan	2023-08-24	Tremor, slowness, rigidity, wearing off	Wearing off	Yes	Yes	Level 1	17727812010	2024-08-24	Medoba1/2-0-1/2, diphenhydroxysol 1-0-0	Medoba1/4tabletstid	jingyu1200-40 Lead；SR1101	STN		+				-					160	60	1.7		+				-					160	60	1.7
		Yao Lihua	Yao Lihua	Male	73	PD	10	Sichuan	2023-08-24	Tremor, slowness, rigidity, wearing off	Wearing off	Yes	Yes	Level 1	17727812010	2024-08-24	Medoba1/2-0-1/2, diphenhydroxysol 1-0-0	Medoba1/2-0-1/2，diphenhydroxysol 1-0-0	jingyu1200-40 Lead；SR1101	STN																		+	-					160	70	0.6
		Yang Qinying	Yang Qinying	Female	53	Meige	16	Gansu	2020-12-09	Right eye spasm	Right eye spasm	Yes	No	Level 1	13830270699	-	Sertraline 1-0-0, Zopiclone 0-0-0-1	㑭ᥒ᧷1-0-0,ٓZopiclone0-0-0-1，risperidone0.5tabletsqN，diphenhydroxysol ֪tabletsbid	Pingchi.1200-40 Lead；SR1101	STN		+				-					130	60	1		+			-						130	60	1.2
		Du Zhixiong	Du Zhixiong	Male	49	Meige	2	Shanghai	2023-08-25	Bilateral eyelid spasm, slight discomfort in the mouth and jaw	-	No	No	Level 1	13301931380	2024-08-25	No	No	jingyu1200-40 Lead；SR1101	STN		+				-					130	60	1.7		+				-					130	60	1.7
		Zhou Taiju	Zhou Taiju	Female	70	PD	7	Jiangxi	2023-08-22	Tremor, slow, fluctuating, shaking	Fluctuation	Yes	No	Level 1	13979212606	2024-08-22	Medroxyprogesterone acetate 1/2-1/2-1/2-1/2, Senforo (0.25mg) 1-1-1, Xi Ning 0-0-0-1, Ketoprofen 1/2-1/2-1/2-1/2, amantadine 1-0-1	Medoba1/4-1/4-1/4	Pingchi.1200-40 Lead；SR1101	STN		+				-					170	60	2.15	1273	+				-					170	70	1.7	1575
		Hu Yijun	Hu Yijun	Male	67	PD	11	Anhui	2023-08-30	-	-	Yes	Yes	Level 1	17858610437	2024-08-30	Medroxyprogesterone acetate 1/2-1/2-1/2-1/2-1/2-1/2, Teshuda 1-1-1, Slaiglan 1-0-0, amantadine 1/2-1/2-1/2	Medopa1/4tabletstid	jingyu1200-40 Lead；SR1101	STN	monopole	C+		1-							130	70	2.7		C+		5-							130	60	1.3
		Hu Yijun	Hu Yijun	Male	67	PD	11	Anhui	2023-08-30	-	-	Yes	Yes	Level 1	17858610437	2024-08-30	Medroxyprogesterone acetate 1/2-1/2-1/2-1/2-1/2-1/2, Teshuda 1-1-1, Slaiglan 1-0-0, amantadine 1/2-1/2-1/2	No	jingyu1200-40 Lead；SR1101	STN					2-						130	70	2
		Wan Min	Wan Min	Female	68	PD	10	Shanghai	2023-08-29	Slow, stiff, dragging steps, back pain	-	Yes	Yes	Level 1	13917693061	2024-08-29	Daringfu 1-1-1-1, Medroxyprogesterone acetate 1/2-1/2-1/2-1/2, Senforo (0.25mg) 1/2-1/2-1/2-1/2	Daringfu 1tabletstid，Prapexor 1tabletstid	Medtronic, 3389S, RC	STN		+		-							130	60	1.1		+		-							130	60	1.2
		Chen Kejin	Chen Kejin	Male	66	PD	10	Jiangsu	2023-08-25	Slow, stiff, freezing, Abnormal movement	Freezing, dyskinesia	Yes	No	Level 2	18962911162	2024-08-25	Xi Ning 1/2-1/2-1/2	Medopa1/4tabletstid	jingyu1200-40 Lead；SR1101	STN		+	-								130	70	2		+		-							130	70	2
		Yuan Ziyang	Yuan Ziyang	Female	20	Dystonia	5	Jiangsu	2023-09-20	Dystonia, tongue protrusion, abnormal gait	Dystonia	No	No	Level 2	18251478559	2024-09-27	diphenhydroxysal 1/2-1/2-1/2, Clonazepam 1/2-0-1/2, Tipride 1/2-1/2-1/2	diphenhydroxysol 1/2-1/2-1/2，Clonazepam1/2-0-1/2，Thiobili1/2-1/2-1/2	Jingyu 1200-40, short spacing 0.5, stimulator rechargeable SR1101	GPI		+	-								130	70	1.8		+	-								130	70	1.8
		Sun Jianshun	Sun Jianshun	Male	62	PD	7	chekiang	2023-08-31	Tremor, slowness, rigidity, wearing off	Tremor, slowness, rigidity, wearing off	Yes	No	Level 2	13938777817	2024-10-07	Medroxyprogesterone acetate 1-1-1, Teshuda 1-1-1, amantadine 1-1-1-1	Medoba1/4tabletstid	Pingchi.1200-40 Lead；SR1101	STN		+		-							130	60	1.3	1258	+		-							130	60	1.7	1196
		Cai Ming	Cai Ming	Male	58	PD	17	Jiangsu	2023-09-01	Tremor, slowness, rigidity, wearing off, dyskinesia	End-of-dose, dyskinesia	Yes	No	Level 2	15366863059	2024-10-07	Medroxyprogesterone acetate 1/2-1/2-1/2, Artane 1/2-1/2-1/2, Prapexor (0.25mg) 1/2-1/2-1/2, amantadine 1/2-1/2-1/2, Rothigottin (4mg) 1/2-0-0, Vitamin B6 1-1-1	Medoba1/2-1/2-1/2	Medtronic, 3389S, RC	STN		+	-								130	60	1.4		+	-								130	60	1
		Chen Ruorong brainsense	Chen Ruorong brainsense	Male	78	PD	5	Tianjin	2023-09-07	Slow, stiff, fluctuating	Slow, stiff, fluctuation	Yes	No	Level 2	15618820423	2024-10-08	Medroxyprogesterone acetate 1-1-1-1, Xi Ning 1-1-1-1, Daringfu 1-1-1-1, Pregabalin 75mg qN, Prapexor 0.25mg tid	Medopa 1/4-1/4-1/4，Pregabalin 75mg qN，Prapexor0.25mg tid	Medtronic, 3389S, RC	STN		+			-						130	60	0.9MA	1233	+		-							130	60	0.9MA	1172	Used brainsense parameters
		Feng Yuefen	Feng Yuefen	Female	70	PD	12	chekiang	2023-09-08	Tremor, slow, end of the dose	Trembling, slow, end of the dose	Yes	Yes	Level 1	13705849855	2024-09-08	Medroxyprogesterone acetate 3/4-3/4-3/4-3/4, Ketoprofen 1-1-1-1, Senforo 5/2-5/2-5/2, amantadine 1-1-1/2	Medoba1/4tabletstid	Medtronic, 3389S, RC	STN		+		-							130	70	1.3	1288	+		-							130	60	1.8	1341
		Xu Ai Qin	Xu Ai Qin	Female	51	扭转痉挛	2	Shanghai	2023-09-04	Cervical dystonia	Neck dystonia	No	No	Level 2	13816318887	2024-09-04	Baclofen 1/2-0-1/2, Oxcarbazepine 0.15 tablets-0-0.15 tablets, Clonazepam 0-0-0-1	Baclofen1/2-0-1/2，Oxcarbazepine0.15tablets-0-0.15tablets，Clonazepam0-0-0-1	jingyu1200-40 Lead；SR1101	GPI		+	-								130	80	1.8		+	-								130	70	1.8
		Wang Wei	Wang Wei	Male	47	PD	5	chekiang	2023-09-05	Tremor, slowness, rigidity, wearing off, dyskinesia	Tremor, slowness, rigidity, wearing off, dyskinesia	Yes	Yes	Level 1	13505745847	2024-09-05	Medoba 3/4-3/4-3/4-3/4, Xi Ning 0-0-0-1/2, Kedan 1-1-1-1, Clozapine 0-0-0-1, Melatonin (6mg) 0-0-0-1	Medoba1/2tabletsqid，Xi Ning1/2tabletsqid，RivalatineẠ3mg qd，Clozapine25mg qN	Medtronic, 3389S, RC	GPI		+		-							130	60	2.2MA		+		-							130	60	2.5MA
		Wang Wei (Brain-sense)	Wang Wei (Brain-sense)	Male	47	PD	5	chekiang	2023-09-05	Tremor, slowness, rigidity, wearing off, dyskinesia	Tremor, slowness, rigidity, wearing off, dyskinesia	Yes	Yes	Level 1	13505745847	2024-09-05	Medoba 3/4-3/4-3/4-3/4, Xi Ning 0-0-0-1/2, Kedan 1-1-1-1, Clozapine 0-0-0-1, Melatonin (6mg) 0-0-0-1	Medoba1/2tabletsqid，Xi Ning1/2tabletsqid，RivalatineẠ3mg qd，Clozapine25mg qN	Medtronic, 3389S, RC	GPI	monopole	C+		1-							130	60	0.9MA	1022	C+		9-							130	60	1.4MA	999
		Chen	Chen	Male	60	Meige	5	chekiang	2023-09-04	Mild blepharospasm, involuntary movements around the mouth	Mild eyelid spasm, involuntary movement around the mouth	No	No	Level 1	13506739926	2024-09-04	No	No	jingyu1200-40 Lead；SR1101	STN		+				-					130	60	2.2v		+				-					130	60	1.8v
		Yang Yuzhang	Yang Yuzhang	Male	68	PD	5	Shandong	2023-09-12	Tremor, slowness, rigidity	Tremor, slowness, rigidity	Yes	Yes	Level 1	15564044608	2024-09-12	Medoba 1/2-1/2-1/2, Xi Ning 0-0-0-1/2, midopy 1-0-1	Medoba1/4tabletsmorning、noon，Xi Ning1/2tabletsevening	Medtronic, 3389S, RC	STN		+		-							130	60	2.2mA		+		-							130	60	1.5mA		Choose manual
		Yang Yuzhang (Brain-sense)	Yang Yuzhang (Brain-sense)	Male	68	PD	5	Shandong	2023-09-12	Tremor, slowness, rigidity	Tremor, slowness, rigidity	Yes	Yes	Level 1	15564044608	2024-09-12	Medoba 1/2-1/2-1/2, Xi Ning 0-0-0-1/2, midopy 1-0-1	Medoba1/4tabletsmorning、noon，Xi Ning1/2tabletsevening	Medtronic, 3389S, RC	STN	monopole	+		-							130	60	1.9MA		+		-							130	60	2.6MA
		Huang Xinyou	Huang Xinyou	Male	62	PD	22	chekiang	2023-09-11	Tremor, slow, stiff, freezing, fluctuating, Abnormal movement, falling	Freezing, dyskinesia	Yes	No	Level 2	18066201630	2024-09-11	Medoba 1/2-1/2-1/2-1/2, Kedan 1/2-1/2-1/2-1/2, Senforo (0.25mg) 1-1-1-1, Slaiglan 1/4-1/4-1/4-1/4, amantadine 1-0-1 (every five days)	Medopa1/4tabletstid	Pingchi.1200-40 Lead；SR1101	STN		+		-							130	60	2.0v	1365	+		-							130	60	2.1v	1405
		Huang Xinyou	Huang Xinyou	Male	62	PD	22	chekiang	2023-09-11	Tremor, slow, stiff, freezing, fluctuating, Abnormal movement, falling	Freezing, Abnormal movement, fluctuation	Yes	No	Level 2	18066201630	2024-09-11	Medoba 1/2-1/2-1/2-1/2, Kedan 1/2-1/2-1/2-1/2, Senforo (0.25mg) 1-1-1-1, Slaiglan 1/4-1/4-1/4-1/4 (every five days), amantadine 1-0-1	Medopa1/4tabletstid	Pingchi.1200-40 Lead；SR1101	STN															+			-						130	60	1.0v	1777
		Cai Zhongying	Cai Zhongying	Male	67	PD	11	chekiang	2022-08-03	Trunk deviation, tremor in left hand	Trunk tilt, left hand tremor	No	No	Level 3	13567950576	外院做，不随访	No	No	Medtronic, 3389S, RC	STN		+		-		-					175	70	3.05v		+		-		-					175HZ	60	2.20v		0-3 is the right STN, 8-11 is the left STN
		Li Yan'er	Li Yan'er	Female	60	PD	8	Shanghai	2023-09-14	Fatigue	-	Yes	Yes	Level 1	13917909881	2024-09-14	Medopa 1/2 tablets tid, Prapexor 1 tablet bid, amantadine 1.5 tablets - 1.5 tablets - 1 tablet, Xi Ning 3/4 tablet tid, Clozapine 1/2 tablet - 1/2 tablet - 3/4 tablet, diphenhydroxysol 1/2 tablet tid	Medopa1/4tabletstid	Medtronic, 3389S, RC	STN	monopole	C+		1-							130	70	2.3	1451	C+		9-							130	60	0.6v	1591
		Teng Zhongrong	Teng Zhongrong	Female	60	PD	10	Anhui	2023-09-14	Tremor, slowness, rigidity, wearing off	Wearing off	Yes	Yes	Level 1	18555333722	2024-09-14	Medoba 1/2-1/2-1/2, Xi Ning 1/2-1/2-1/2, Prapexor (0.25mg) 1-1-1, diphenhydroxysol 1/2-0-1/2, amantadine 3/2-3/2-1, Clozapine 1/4-1/4-1/2	Medoba1/2-1/2-1/2	Pingchi.1200-40 Lead；SR1101	STN		+		-							140	70	2.5	1145	+		-							140	70	2	1286
		Teng Zhongrong	Teng Zhongrong	Female	60	PD	10	Anhui	2023-09-14	Tremor, slowness, rigidity, wearing off	Wearing off	Yes	Yes	Level 1	18555333722	2024-09-14	Medoba 1/2-1/2-1/2, Xi Ning 1/2-1/2-1/2, Prapexor (0.25mg) 1-1-1, diphenhydroxysol 1/2-0-1/2, amantadine 3/2-3/2-1, Clozapine 1/4-1/4-1/2	Medoba1/2-1/2-1/2	Pingchi.1200-40 Lead；SR1101	STN		+			-						140	70	2	1183	+			-						140	70	1.5	1515
		Xing Wanzong	Xing Wanzong	Male	63	PD	5	Henan	2023-09-08	Tremor, stiffness	Trembling, stiff	Yes	No	Level 2	13839806983	2024-09-08	Medoba 3/4-3/4-3/4-3/4, Kedan 1/2-1/2-1/2, amantadine 1-1-1	Medoba1/2tabletstid	Pingchi.1200-40 Lead；SR1101	STN		+		-							130	60	1.0v	1192	+		-							130	60	2.5v	1419
		Liang Zhirong	Liang Zhirong	Male	39	PD	10	chekiang	2023-04-14	Hypokinesia, stiffness	Hypokinesia, stiffness	No	No	Level 3	13058803177	2024-04-14	Medoba 3/4-3/4-3/4, Baclofen 1-0-1, Memantine Hydrochloride 1/2-0-1/2, amantadine 1-1-1, diphenhydroxysol 1/2-1/2-1/2	Medoba3/4-3/4-3/4，Baclofen1-1-1，Memantine Hydrochloride1/2-0-1/2，amantadine1-1-1，diphenhydroxysol 1/2-1/2-1/2，RivalatineẠ1.5mg bid，Xi Ning֪tabletsbid	Medtronic, 3389S, RC	STN		+		-		-					170	90	3.15	583	+			-	-					170	80	3.2	782
		Guo Chunsheng	Guo Chunsheng	Male	61	PD	15	Jiangxi	2023-09-01	Slow, stiff, drooling, tremor, fluctuating, pressure sensation in the occipital area	Fluctuation, drooling, pressure sensation in the occipital region	No	No	Level 3	18170660041	2024-09-01	Medoba 1-1-1, Quetiapine 0-0-0-1 (Dose ominous), alprazolam 仑 1-0-1	Medoba1/2-1/2-1/2，Quetiapine0-0-0-1（(dose unknown), alprazolam1-0-1	Pingchi.1200-40 Lead；SR1101	STN		+		-	-						135	80	2.6	870	+		-	-						135	80	2.5	804
		Guo Chunsheng	Guo Chunsheng	Male	61	PD	15	Jiangxi	2023-09-01	Slow, stiff, drooling, tremor, fluctuating, pressure sensation in the occipital area	Fluctuation, drooling, pressure sensation in the occipital region	No	No	Level 3	18170660041	2024-09-01	Medoba 1-1-1, Quetiapine 0-0-0-1 (dose unknown), alprazolam 1-0-1	Medoba1/2-1/2-1/2，Quetiapine0-0-0-1（(dose unknown), alprazolam1-0-1	Pingchi.1200-40 Lead；SR1101	STN		+				-					135	80	2.9	1161	+				-					135	70	2.8	1050
		Lü Zhonggan	Lü Zhonggan	Female	54	PD	15	Jiangsu	2023-09-14	Tremor, slowness, rigidity, wearing off	Wearing off	Yes	No	Level 2	13401776390	2024-09-14	Medoba 7/8-7/8-7/8-7/8, amantadine 1-0-1	Medopa3/4tabletstid	jingyu1200-40 Lead；SR1101	STN		+		-							130	60	1.8		+		-							130	60	2.5
		Cao Jiankang	Cao Jiankang	Male	61	PD	9	Jiangsu	2023-09-19	Slowness, rigidity, end-of-dose	Wearing off	Yes	Yes	Level 1	13862380525	2024-09-19	Medoba 3/4-3/4-3/4-3/4, Xi Ning 3/4-0-0, Vitaminb6 1-1-1, Teshuda 1-1-1, midopy 1-0-1, amantadine 1-1-1, diphenhydroxysol 1/2-0-1/2	Medoba1/4-1/4-1/4	Medtronic, 3389S, RC	STN		+			-						130	60	1.1	1503	+		-							130	70	2	1208
		Wang Fuzhen	Wang Fuzhen	Female	71	ET	6	Jiangsu	2023-09-13	Tremor	Tremor	No	No	Level 1	18352480878	2024-09-13	No	No	jingyu1200-40 Lead；SR1101	VIM-PSA		+	-								130	60	1.8		+	-								130	60	1.8
		Sun Suling	Sun Suling	Female	43	HD	4	Anhui	2022-03-21	Choreiform movements, dizziness after starting up	Dance-like movements, side effect after starting up	No	No	Level 3	18756873950	2023-11-23	risperidone 1/4 tablets qN	Aripiprazole1/2tabletsqN	Jingyu, 1210-40	GPi				+	-						130	60	2		+	-								130	60	2.1		Surgery performed at the First Affiliated Hospital of Anhui Medical University
		Qian Wenbin	Qian Wenbin	Male	54	PD	20	chekiang	2023-09-18	Abnormal movement, slow and stiff	Abnormal movement, slow stiffness	Yes	No	Level 2	13777646108	2024-09-18	Medopa 1/2 tablets qid, Senforo 0.25mg 2 tablets tid, Kedan 1 tablet qid, Daringfu 1 tablet 17:00, amantadine 1 tablet tid	Medopa1/2tabletsqid，amantadine1tabletstid，Clozapine1/4tablets slow dosage，Levetiracetam0.75 bid，	Pingchi.1200-40 Lead；SR1101	STN		+			-						130	60	1.6		+		-							130	60	1.6		Postoperative laryngeal stridor, endotracheal intubation and ventilator-assisted breathing, then extubated
		Zhou Wenqin	Zhou Wenqin	Female	68	PD	12	Jiangsu	2023-09-21	Tremor, slow, stiffness, end of the dose, off-period dystonia	End of the dose, dyskinesia during off period	Yes	No	Level 2	13395148603	2024-09-21	Medoba 1/2-1/2-1/2-1/2, Senforo (0.25mg) 3/2-3/2-3/2-3/2, Vitaminb6 1-1-1-1, Vitaminb12 1-1-1	Medoba1/4-1/4-1/4	Pingchi.1200-40 Lead；SR1101	STN					-	+					170	60	1.75	2146	+		-							170	60	1.8v	1668
		Zhou Wenqin	Zhou Wenqin	Female	68	PD	12	Jiangsu	2023-09-21	Tremor, slow, stiffness, end of the dose, off-period dystonia	End of the dose, dyskinesia during off period	Yes	No	Level 2	13395148603	2024-09-21	Medoba 1/2-1/2-1/2-1/2, Senforo (0.25mg) 3/2-3/2-3/2-3/2, Vitaminb6 1-1-1-1, Vitaminb12 1-1-1	Medoba1/4-1/4-1/4	Pingchi.1200-40 Lead；SR1101	STN		+				-					170	60	2.4	1328
		Xu Aihua	Xu Aihua	Female	59	Dystonia（systemic)	53	chekiang	2023-09-19	Left GPI, right STN	-	No	No	Level 2	15868602046	2024-09-19	No	No	jingyu1200-40 Lead；SR1101	左GPI,右STN		+	-								130	90	1.6v		+				-					130	60	1.4
		Jiang Yueqin	Jiang Yueqin	Female	69	PD	11	chekiang	2023-09-22	Tremor, slow, stiffness, whole body pain, fluctuations, abnormal movement	Fluctuations, Abnormal movement	Yes	No	Level 2	15869268113	2024-09-22	Medoba 3/4-1/2-1-3/4, Kedan 1/2-1/2-1/2-1/2, Xi Ning 1/2 (10:00)-0-0, amantadine 1-1-0	Medoba1/4-1/4-1/4	Pingchi.1200-40 Lead；SR1101	STN		+		-							150	70	2.5		+		-							150	70	2.5
		Jiang Yueqin	Jiang Yueqin	Female	69	PD	11	chekiang	2023-09-22	Tremor, slow, stiffness, whole body pain, fluctuations, abnormal movement	Fluctuations, Abnormal movement	Yes	No	Level 2	15869268113	2024-09-22	Medoba 3/4-1/2-1-3/4, Kedan 1/2-1/2-1/2-1/2, Xi Ning 1/2 (10:00)-0-0, amantadine 1-1-0	Medoba1/4-1/4-1/4	Pingchi.1200-40 Lead；SR1101	STN		+			-						150	60	1.5		+				-					150	60	1.6
		Lin Xiubi	Lin Xiubi	Female	58	PD	12	Fujian	2023-09-22	Slow, stiffness, fluctuations, abnormal movement, whole body soreness	Fluctuations, Abnormal movement	Yes	No	Level 2	15392222268	2024-09-22	Medoba 3/4-3/4-3/4-1/2, Teshuda 1-1-1, amantadine 1-1-0, Kedan 1/2-1/2-1/2-1/2	Medoba1/2-1/2-1/2	Pingchi.1200-40 Lead；SR1101	STN		+			-						130	60	1.9	1530	+				-					130	60	1.7v	1643
		Yue Huijuan	Yue Huijuan	Female	59	SCA12	6	Jiangsu	2022-11-08	Unsteady walking, shaking in the right hand	-	No	No	Level 3	13812752331	2025-11-08	No	Prapexor（0.125mg）0-0-0-1	jingyu1200-40 Lead；SR1101	VIM-PSA		+	-								180	90	3.4		+	-								170	60	3		Cycle, turn off from 0:00 to 1:00
		Storage of Yixing	Storage of Yixing	Female	68	PD	8	Shanghai	2023-09-21	-	-	Yes	Yes	Level 1	13500787967	2024-09-21	Medoba 1/2-1/2-1/2, diphenhydroxysol 1/2-0-1/2	Medoba1/4-1/4-1/4	Medtronic, 3389S, RC	STN		+		-							130	60	1.8v	1855	+		-							130	60	2.0v	1306
		Zheng Shan Yan	Zheng Shan Yan	Female	50	PD	16	chekiang	2015-11-30	Crying at night, disoriented behavior with hallucinations, depression	Hallucinations, depression	No	No	Level 3	13732323211	-	Medoba 1/4-1/4-1/4, Xi Ning 1/4-0-1/4, Resa Gilan 1-0-0, Quetiapine (100mg) 0-0-0-1, Teshuda 1-1-1, Clonazepam 0-0-0-1/4	Medoba1/4-1/4-1/4，Xi Ning1/4-0-1/4，Resa Gilan1-0-0，Clozapine0-0-0-1/2，ຨᡴ୺ၔ1-1-0，Clonazepam0-0-0-1/4，Midojun1-1-0	Medtronic, 3389S, RC	STN		+			-						105	60	0.8		+			-						105	60	0.9v
		Zheng Shan Yan	Zheng Shan Yan	Female	50	PD	16	chekiang	2015-11-30	Crying at night, disoriented behavior with hallucinations, depression	Hallucinations, depression	No	No	Level 3	13732323211	-	Medoba 1/4-1/4-1/4, Xi Ning 1/4-0-1/4, Resa Gilan 1-0-0, Quetiapine (100mg) 0-0-0-1, Teshuda 1-1-1, Clonazepam 0-0-0-1/4	Medoba1/4-1/4-1/4，Xi Ning1/4-0-1/4，Resa Gilan1-0-0，Clozapine0-0-0-1/2，ຨᡴ୺ၔ1-1-0，Clonazepam0-0-0-1/4，Midojun1-1-0	Medtronic, 3389S, RC	STN		+				-					105	70	1.85v		+				-					105	70	0.4v
		Zhou Shiming	Zhou Shiming	Male	65	PD	9	chekiang	2023-09-25	-	-	Yes	Yes	Level 1	15157833726	2024-09-25	Medoba 3/4-3/4-3/4-3/4, Senforo (0.25mg) 1-1-1-1, Resa Gilan 1-0-0, amantadine 1-1-0	Medoba1/4-1/4-1/4	Medtronic, 3389S, RC	STN		+		-							130	60	2.6MA		+		-							130	60	2.3MA
		Zhou Shiming (Brain-sense)	Zhou Shiming (Brain-sense)	Male	65	PD	9	chekiang	2023-09-25	-	-	Yes	Yes	Level 1	15157833726	2024-09-25	Medoba 3/4-3/4-3/4-3/4, Senforo (0.25mg) 1-1-1-1, Resa Gilan 1-0-0, amantadine 1-1-0	Medoba1/4-1/4-1/4	Medtronic, 3389S, RC	STN		+		-							130	60	1.6MA		+			-						130	60	1.6MA
		Wang Shanchun	Wang Shanchun	Male	53	PD	6	chekiang	2023-09-26	Slow, drooling, RBD	RBD	Yes	No	Level 2	13735932939	2024-09-26	Medoba 1/2-1/2-1/2-1/2, Kedan 1/2-1/2-1/2-1/2, Daringfu 0-0-0-1, Prapexor (0.5mg) 0-0-0-1, amantadine 0-0-0-1	Medoba1/4-1/4-1/4	Pingchi.1200-40 Lead；SR1101	STN		+		-							130	60	1.8v	1503	+		-							130	60	1.3v	1829
		Ann Meffen	Ann Meffen	Female	67	PD	11	chekiang	2023-09-27	Slow, stiffness, fluctuations, sometimes coughing, back pain	Fluctuations	Yes	Yes	Level 1	15067438956	2024-09-27	Medoba 1/2-1/2-1/2-1/2, Xi Ning 1/2-1/2-1/2-1/2, Teshuda 1-1-1, amantadine 1-1-1, diphenhydroxysol 1/2-0-1/2, Clozapine 1/2-1/2-1/2-1/2	Medoba1/2-1/2-1/2，Clozapine0-0-0-1/2	Pingchi.1200-40 Lead；SR1101	STN		+			-						130	60	2.25	987	+			-						130	60	1.6v	1243
		Ye Jinhao	Ye Jinhao	Male	71	PD	7	chekiang	2023-09-28	-	-	Yes	No	Level 2	18158198409	2024-09-28	Medoba 3/4-3/4-3/4-3/4, Kedan 1/2-1/2-1/2, Resa Gilan 1-0-0, Quetiapine (100mg) 1-0-0	Medoba3/4-3/4-3/4-3/4，Kedan1/2-1/2-1/2，Resa Gilan1-0-0，Quetiapine（100mg）1-0-0	Medtronic, 3389S, RC	STN		+		-							130	60	2.01MA		+		-							130	60	1.8AM
		Zhang Changgui	Zhang Changgui	Male	59	PD	13	Jiangsu	2020-07-15	Trembling in the left hand, soft voice, eyes open, freezing, slow, less sweating on the left side, stiffness, fluctuations (lasts 40-60 minutes)	Freezing, fluctuations	No	No	Level 1	13182183166	-	Medoba 1/4-1/4-1/4-1/4-1/4, diphenhydroxysol 1/2-0-1/2 (sometimes taken as 1/2, no Abnormal movement, duration can be extended)	Medoba1/4-1/4-1/4-1/4-1/4，diphenhydroxysol 1/2-0-1/2，Xi Ning֪tabletsbid	Pingchi.1200-40 Lead；SR1101	STN		+				-					160	70	2	3695	+			-						160	80	2.4	862	High resistance found in 3-, 5-, and 6- during this hospitalization
		Zhang Changgui	Zhang Changgui	Male	59	PD	13	Jiangsu	2020-07-15	Trembling in the left hand, soft voice, eyes open, freezing, slow, less sweating on the left side, stiffness, fluctuations (lasts 40-60 minutes)	Freezing, fluctuations	No	No	Level 1	13182183166	-	Medoba 1/4-1/4-1/4-1/4-1/4, diphenhydroxysol 1/2-0-1/2 (sometimes taken as 1/2, no Abnormal movement, duration can be extended)	Medoba1/4-1/4-1/4-1/4-1/4，diphenhydroxysol 1/2-0-1/2，（ᥩᡖᥭ➈1/2，ᡀAbnormal movement，ᕡㅍᡖ䡔ُᅖ䟟）	Pingchi.1200-40 Lead；SR1101	STN															+				-					160	70	2.3	1052
		Qian Chunfeng	Qian Chunfeng	Female	65	震颤	22	Jiangsu	2021-11-26	Unsteady walking, prone to falling, falls backward after squatting, May 2023, tongue cannot roll, cognitive decline, (winter 2022) memory decline	-	Yes	Yes	Level 1	15861015266	2024-11-26	No	No	jingyu1200-40 Lead；SR1101	VIM-PSA		+		-							180	90	2.2v			-	+							185	80	2.9
		Zhang Shouwei	Zhang Shouwei	Male	53	Dystonia	11	Hubei	2023-10-23	Head tilted backward, abnormal posture of limbs and torso, involuntary movements of both upper limbs and face	-	No	No	Level 2	13635812935	2024-10-23	No	No	Pingchi.1200-40 Lead；SR1101	GPI		+	-								130	60	1.0v	1235	+	-								130	60	1.0v	998
		Yu Guiping	Yu Guiping	Female	68	PD	18	Anhui	2023-10-07	-	-	Yes	No	Level 2	15922348441	2024-10-07	Medoba 3/4-3/4-3/4-3/4-3/4-3/4-3/4-(3/4)	Medoba3/4-3/4-3/4-3/4-3/4-3/4-3/4-（3/4）	jingyu1200-40 Lead；SR1101	STN		+		-							130	60	2		+		-							130	60	2.1
		Shi Aizhen	Shi Aizhen	Female	68	PD	10	chekiang	2023-10-08	Slow, stiffness, end of the dose, poor balance	Wearing off	Yes	No	Level 2	13867677327	2024-10-08	Medoba 1/2-1/2-1/2-1/2, Vitamin B6 1-1-1, Senforo (0.25mg) 1/2-1/2-1/2, Resa Gilan 1-0-0	Medoba1/2-1/2-1/2-1/2，Vitaminb6 1-1-1，Senforo（0.25mg）1/2-1/2-1/2，Resa Gilan1-0-0	Medtronic, 3389S, RC	STN	monopole	C+		-							130	60	1.8v	1461	+		-							130	60	1.5	1693
		Shi Aizhen	Shi Aizhen	Female	68	PD	10	chekiang	2023-10-08	Slow, stiffness, end of the dose, poor balance	Wearing off	Yes	No	Level 2	13867677327	2024-10-08	Medoba 1/2-1/2-1/2-1/2, Vitamin B6 1-1-1, Senforo (0.25mg) 1/2-1/2-1/2, Resa Gilan 1-0-0	Medoba1/2-1/2-1/2-1/2，Vitaminb6 1-1-1，Senforo（0.25mg）1/2-1/2-1/2，Resa Gilan1-0-0	Medtronic, 3389S, RC	STN		+		-							130	60	1.4v	1538	+		-							130	60	1.5	1693
		Deng Meiying	Deng Meiying	Female	63	PD	11	chekiang	2023-10-09	-	-	Yes	No	Level 2	13588642695	2024-10-09	Medoba 3/4-3/4-3/4, amantadine 1-1-1, Prapexor (0.25mg) 2-2-2	Medoba3/4-3/4-3/4，amantadine1-1-1，Prapexor（0.25mg）2-2-2	Pingchi.1200-40 Lead；SR1101	STN		+		-							130	60	1.70v		+		-							130	60	2.0v
		Deng Meiying	Deng Meiying	Female	63	PD	11	chekiang	2023-10-09	-	-	Yes	No	Level 2	13588642695	2024-10-09	Medoba 3/4-3/4-3/4, amantadine 1-1-1, Prapexor (0.25mg) 2-2-2	Medoba3/4-3/4-3/4，amantadine1-1-1，Prapexor（0.25mg）2-2-2	Pingchi.1200-40 Lead；SR1101	STN		+		-							135	60	1.60v	1188	+		-							135	60	2.2v	952
		Han Mugen	Han Mugen	Male	74	PD	5	chekiang	2023-04-06	-	-	Yes	Yes	Level 1	13819584626	2024-04-06	Medoba 1/2-1/2-1/2	Medoba1/2-1/2-1/2	Medtronic, 3389S, RC	STN		+		-							130	60	2v	1105	+		-							130	60	2.2v	1050
		Qu Li	Qu Li	Female	51	PD	13	Beijing	2023-10-13	Tremor	-	Yes	No	Level 2	13031105624	2024-11-13	Medoba 1/2-1/2-1/2, Senforo (0.25mg) 1/2-1/2-1/2, Almar 1-1-1	Medoba1/2-1/2-1/2，Senforo（0.25mg）1/2-1/2-1/2，Almar1-1-1	Pingchi.1200-40 Lead；SR1101	左vim		+	-								50	80	1.0v
		Bu Rongdi	Bu Rongdi	Female	59	PD	7	Shanghai	2023-10-12	Slow, stiff, dyskinesia	Dyskinesia	Yes	Yes	Level 1	13564105876	2024-10-12	Medoba 1/2-1/2-1/2-1/2, Xi Ning 1/2-1/2-1/2-1/2, Senforo (0.25mg) 1-0-0, Resa Gilan 1-0-0, amantadine 1-0-0, Clozapine 0-0-0-1/4	Medoba1/2-1/2-1/2-1/2，Xi Ning1/2-1/2-1/2-1/2，Senforo（0.25mg）1-0-0，Resa Gilan1-0-0，amantadine1-0-0，Clozapine0-0-0-1/4	Pingchi.1200-40 Lead；SR1101	STN		+			-						130	60	1.1v	1769	+			-						130	60	1.2v	1593
		Gao Ruiliang	Gao Ruiliang	Male	72	PD	7	Shanghai	2023-10-17	Tremor, slow, stiff	-	Yes	Yes	Level 1	13818137910	2024-10-17	No	No	Medtronic, 3389S, RC	STN	monopole	C+			2-						130	60	2.3v	1048	C+			10-						130	60	2.0v
		Yang Rongmei	Yang Rongmei	Female	60	ET	22	Jiangsu	2023-10-10	Trembling, slow movements, tremor	-	No	No	Level 2	17312914328	2024-10-10	No	No	jingyu1200-40 Lead；SR1101	STN		+	-								130	60	1.9v		+	-								130	60	1.9v
		Xiao Xiufang	Xiao Xiufang	Female	72	PD	15	Jiangxi	2023-10-18	Slow, stiff	-	Yes	No	Level 2	13367902699	2024-10-18	No	No	jingyu1200-40 Lead；SR1101	STN		+		-							130	60	1.0v		+		-							130	60	1.6
		Xiao Xiufang	Xiao Xiufang	Female	72	PD	15	Jiangxi	2023-10-18	Slow, stiff	-	Yes	No	Level 2	13367902699	2024-10-18	No	No	jingyu1200-40 Lead；SR1101	STN		+		-							130	60	1.2v		+		-							130	60	1.8
		Song Xinhui	Song Xinhui	Female	55	PD	5	Jiangsu	2023-10-18	-	-	Yes	Yes	Level 1	13951621870	2024-10-18	Medoba 1/2-1/2-1/2, Xi Ning 1/2-1/2-1/2, amantadine 1-0-1, Prapexor (0.75mg) 0-0-0-1	Medoba1/2-1/2-1/2，Xi Ning1/2-1/2-1/2，amantadine1-0-1，Prapexor（0.75mg）0-0-0-1	jingyu1200-40 Lead；SR1101	STN		+		-							130	60	2.1		+		-							130	60	2
		Easy to open the blue	Easy to open the blue	Female	60	PD	13	Guizhou	2023-10-20	Trembling, stiffness	-	Yes	No	Level 2	13765926326	2024-10-20	No	No	Pingchi.1200-40 Lead；SR1101	STN		+			-						150	60	2.2		+			-						150	60	2
		Miao Weihua	Miao Weihua	Male	69	PD	24	Shanghai	2023-10-24	Slow, stiffness, abnormal movement, end of the dose	Abnormal movement, end of the dose	Yes	Yes	Level 1	13917983658	2024-10-24	No	No	Medtronic, 3389S, RC	STN		+			-						130	60	1.0MA	1713	+		-							130	60	1.5mA	1488
		Zhang Yingying	Zhang Yingying	Female	70	PD	20	Henan	2018-01-22	Slow movements, stiffness, reduced voice volume	-	No	No	Level 2	18416847668	-	Medoba 1/2-1/2-1/2	Medoba1/2-1/2-1/2	Pingchi.1200-40 Lead；SR1101	STN		C+		1-							110	90	3.0v		C+			10-						110	60	2.5v
		Zhang Yingying	Zhang Yingying	Female	70	PD	20	Henan	2018-01-22	Slow movements, stiffness, reduced voice volume	-	No	No	Level 2	18416847668	-	Medoba 1/2-1/2-1/2	Medoba1/2-1/2-1/2	Pingchi.1200-40 Lead；SR1101	STN		C+			2-						110	90	2.80v				9-							110	60	3.0v
		Liao Hongwei	Liao Hongwei	Male	48	PD	10	chekiang	2023-11-01	Slow, stiffness, end of the dose, drooling	Wearing off	Yes	No	Level 2	13819192867	2024-11-01	Medoba 1/2-1/2-1/2, Vitaminb6 1-1-1, Clozapine 1/4-1/4-1/2, amantadine 1-0-0	Medoba1/2-1/2-1/2，Vitaminb6 1-1-1，Clozapine1/4-1/4-1/2，amantadine1-0-0	Pingchi.1200-40 Lead；SR1101	STN		+		-							150	60	2.5		+		-							150	60	3
		Zhang Guozhong	Zhang Guozhong	Male	69	PD	5	chekiang	2023-10-31	Tremor, slow, stiff	-	Yes	No	Level 2	15168309157	2024-10-31	Medoba 1-1-1-1, amantadine 1-1-1, Teshuda 1-1-1. Resa Gilan 1-0-0	Medoba1-1-1-1，amantadine1-1-1，Teshuda1-1-1.Resa Gilan1-0-0	Pingchi.1200-40 Lead；SR1101	STN		+		-							130	60	2		+		-							130	60	1.2
		Zhang Guozhong	Zhang Guozhong	Male	69	PD	5	chekiang	2023-10-31	Tremor, slow, stiff	-	Yes	No	Level 2	15168309157	2024-10-31	Medoba 1-1-1-1, amantadine 1-1-1, Teshuda 1-1-1. Resa Gilan 1-0-0	Medoba1-1-1-1，amantadine1-1-1，Teshuda1-1-1.Resa Gilan1-0-0	Pingchi.1200-40 Lead；SR1101	STN		+		-							130	60	1.8		+		-							130	60	0.8
		Van Gentian	Van Gentian	Male	67	PD	7	chekiang	2023-10-27	Bilateral tremor, left lower limb stiffness, freezing	Freezing	Yes	Yes	Level 1	13968052619	2024-10-27	No	No	Pingchi.1200-40 Lead；SR1101	STN		+			-						150	60	1.8		+			-						150	70	2
		Yellow satellite	Yellow satellite	Male	66	PD	5	Shanghai	2023-10-26	Trembling (more on the left), stiffness	-	Yes	Yes	Level 1	18917937277	2024-10-26	No	No	Medtronic, 3389S, RC	STN		+			-						150	60	1.0MA		+		-							150	60	1.5mA
		Xue Jianting	Xue Jianting	Male	67	PD	10	Shandong	2023-10-27	Slow, stiffness, freezing, end of the dose (more on the left)	End of the dose, freezing	Yes	No	Level 2	13515323911	2024-10-27	Medoba 3/4-3/4-3/4-3/4, Xi Ning 1/2-1/2-1/2-1/2	Medoba3/4-3/4-3/4-3/4，Xi Ning1/2-1/2-1/2-1/2	Medtronic, 3389S, RC	STN		+		-							130	60	0.8MA		+			-						130	60	1.0MA
		The competition is in full swing	The competition is in full swing	Female	64	Meige	10	Inner Mongolia	2023-10-27	-	-	No	No	Level 2	18547133110	2024-10-27	No	No	Medtronic, 3389S, RC	GPI	monopole	C+		1-							130	90	2.5v		C+	8-								130	60	2.5v
		Zhang Haili	Zhang Haili	Female	36	Dystonia	6	chekiang	2023-11-03	It is difficult to open your eyes and mouth, and your right leg is stretched forward	-	No	No	Level 2	13905789428	2024-11-03	No	No	Pingchi.1200-40 Lead；SR1101	GPI		+	-								150	60	3.0v		+	-								150	60	3.0v
		Xu Ming	Xu Ming	Male	66	PD	17	Jiangsu	2023-10-31	Shake, stiff, freeze, (more weight on the right)	Freezing	Yes	Yes	Level 1	13861506800	2024-10-31	No	No	jingyu1200-40 Lead；SR1101	STN		+		-							150	60	1.60v		+		-							150	60	1.90v
		Thank you, Huigen	Thank you, Huigen	Male	68	PD	6	chekiang	2023-11-08	-	-	Yes	Yes	Level 1	13456824358	2024-11-08	Medoba 1-1-1-1/2, Xi Ning 1-0-0	Medoba1-1-1-1/2，Xi Ning1-0-0	Pingchi.1200-40 Lead；SR1101	STN	monopole	C+			3-						130	60	1.6	1503	C+		6-							130	60	2	1554
		Chen Linhua	Chen Linhua	Male	53	PD	10	chekiang	2023-11-07	Abnormal movement, end of the dose	Abnormal movement, end of the dose	Yes	Yes	Level 1	13858665668	2024-11-07	Medoba 1-1-1-1, amantadine 1-1-1-1	Medoba1-1-1-1，amantadine1-1-1-1	jingyu1200-40 Lead；SR1101	STN	monopole	C+				3-					140	60	1.2		C+				7-					130	60	1.5
		Shi Jianguo	Shi Jianguo	Male	64	PD	10	Jiangsu	2023-11-09	Tremor, slow, stiff	-	Yes	Yes	Level 1	13921516193	2024-11-09	Medoba 1-0-1, Xi Ning 0-1-0-1, Prapexor (0.25mg) 1/2-0-1/2, amantadine 1-1-0-1	Medoba1-0-1，Xi Ning0-1-0-1，Prapexor（0.25mg）1/2-0-1/2，amantadine1-1-0-1	Pingchi.1200-40 Lead；SR1101	STN	cross	C+		2-							140	60	1.3		C+		6-							140	60	1
		Shi Jianguo	Shi Jianguo	Male	64	PD	10	Jiangsu	2023-11-09	Tremor, slow, stiff	-	Yes	Yes	Level 1	13921516193	2024-11-09	Medoba 1-0-1, Xi Ning 0-1-0-1, Prapexor (0.25mg) 1/2-0-1/2, amantadine 1-1-0-1	Medoba1-0-1，Xi Ning0-1-0-1，Prapexor（0.25mg）1/2-0-1/2，amantadine1-1-0-1	Pingchi.1200-40 Lead；SR1101	STN															C+			7-						140	60	2.5
		Cheng Suzhen	Cheng Suzhen	Female	66	PD	6.5	Jiangsu	2023-04-27	Olivia, rigidity, tremor, balance disorders	-	Yes	Yes	Level 1	13646218106	2024-04-27	Medoba 1/4-1/4-1/4, Vitaminb6 1-1-1, Rivalatine汀 1-0-1, Citalopram 3/2-0-0	Medoba1/4-1/4-1/4，Vitaminb6 1-1-1，RivalatineẠ1-0-1，Citalopram3/2-0-0	Medtronic, 3389S, RC	STN	cross	C+		1-							110	70	2.1		C+		9-							110	70	2.9
		Cheng Suzhen	Cheng Suzhen	Female	66	PD	6.5	Jiangsu	2023-04-27	Olivia, rigidity, tremor, balance disorders	-	Yes	Yes	Level 1	13646218106	2024-04-27	Medoba 1/4-1/4-1/4, Vitaminb6 1-1-1, Rivalatine汀 1-0-1, Citalopram 3/2-0-0	Medoba1/4-1/4-1/4，Vitaminb6 1-1-1，RivalatineẠ1-0-1，Citalopram3/2-0-0	Medtronic, 3389S, RC	STN	cross	C+				3-					110	70	2.1		C+			10-						110	70	2.9
		Yang Jia	Yang Jia	Female	66	Meige	3	Shanghai	2023-11-15	Bilateral blepharospasm	-	No	No	Level 3	13816650245	2024-11-15	No	No	Pingchi.1200-40 Lead；SR1101	GPI	monopole	C+	1-								130	80	1.8	1285	C+	5-								130	80	1.8	1222
		The road is illuminated	The road is illuminated	Male	68	PD	9	Anhui	2023-11-03	Tremor, slow, stiff	-	Yes	No	Level 2	13855371683	2024-11-03	Medoba 3/4-3/4-3/4, diphenhydroxysol 1/2-1/2-1/2, Prapexor (0.25mg) 1-1-1	Medoba3/4-3/4-3/4，diphenhydroxysol 1/2-1/2-1/2，Prapexor（0.25mg）1-1-1	jingyu1200-40 Lead；SR1101	STN		+		-							140	60	2		+		-							130	60	1.5
		Qian Jinhua	Qian Jinhua	Male	75	PD	8	Jiangsu	2023-11-08	Wearing off	Wearing off	Yes	No	Level 2	18952437302	2024-11-08	Medoba 1/2-1/2-1/2, Senforo (0.25mg) 2-2-2	Medoba1/2-1/2-1/2，Senforo（0.25mg）2-2-2	Medtronic, 3389S, RC	STN	monopole	C+			2-						130	60	1		C+			10-						130	60	1.4
		Ye Wentong	Ye Wentong	Male	66	PD	10	chekiang	2023-11-03	Wearing off	Wearing off	No	No	Level 3	18858499728	2024-11-03	Medoba 1/2-1/2-1/2-1/2, Kedan 1-1-1, Xi Ning 1/2-1/2-1/2-1/2, Vitamin B6 1-1-1-1	Medoba1/2-1/2-1/2-1/2，Kedan1-1-1，Xi Ning1/2-1/2-1/2-1/2，Vitaminb6 1-1-1-1	Medtronic, 3389S, RC	STN	monopole	C+			2-						130	70	2		C+		9-							130	70	2.1
		Hu Yongqing	Hu Yongqing	Male	69	PD	12	Jiangsu	2023-11-20	Stiff, hard	-	Yes	No	Level 2	13952520626	2024-12-18	No	No	Medtronic, 3389S, RC	STN	monopole	C+			2-						125	70	2.2	1485	C+		9-							125	70	2	1436
		Hu Yongqing	Hu Yongqing	Male	69	PD	12	Jiangsu	2023-11-20	Stiff, hard	-	Yes	No	Level 2	13952520626	2024-12-18	No	No	Medtronic, 3389S, RC	STN	monopole	C+		1-							125	60	1.4	1813
		Fan Jiawei	Fan Jiawei	Male	23	Dystonia	8	Liaoning	2023-11-15	-	-	No	No	Level 1	13591399343	2024-11-15	No	No	Pingchi.1200-40 Lead；SR1101	GPI	monopole	C+		1-							130	150	2.5mA		C+	4-								130	140	2.5mA
		Shao Shou'an	Shao Shou'an	Male	54	PD	8	Ningxia	2023-11-14	End of the dose, trembling	Wearing off	No	No	Level 3	15222727305	2024-11-14	Medoba 3/4-3/4-3/4, Slaiglan 1-0-1, Teshuda 1-1-1, diphenhydroxysol 1/2-1/2-1/2	Medoba1/2-1/2-1/2，diphenhydroxysol 1/2-1/2-1/2	jingyu1200-40 Lead；SR1101	STN	monopole	C+			2-						120	60	1.1v		C+		5-							160	70	2.2v
		Chen Huiqin	Chen Huiqin	Female	70	PD	10	Wuhan	2023-11-10	Freezing, dyskinesia	Freezing, dyskinesia	Yes	No	Level 2	18171419428	2024-11-10	Medoba 3/4-3/4-3/4-3/4, Xi Ning 1/2-1/2-1/2, Vitamin B6 1-1-1, amantadine 1-1-1, Slaiglan 1-0-1	Medoba1/2-1/2-1/2	Pingchi.1200-40 Lead；SR1101	STN	monopole	C+			3-						vfs	70	1.3	1723	C+				8-					vfs	60	1.7	1321
		Chen Huiqin	Chen Huiqin	Female	70	PD	10	Wuhan	2023-11-10	Freezing, dyskinesia	Freezing, dyskinesia	Yes	No	Level 2	18171419428	2024-11-10	Medoba 3/4-3/4-3/4-3/4, Xi Ning 1/2-1/2-1/2, Vitamin B6 1-1-1, amantadine 1-1-1, Slaiglan 1-0-1	Medoba1/2-1/2-1/2	Pingchi.1200-40 Lead；SR1101	STN															C+			7-						vfs	60	1	2383
		Guan Guoqin	Guan Guoqin	Female	68	PD	12	Jiangxi	2023-11-17	Wearing off	Wearing off	Yes	No	Level 2	13566818599	2024-11-17	Prapexor (0.75mg) 1-1-1, Medoba 0-0-0-1/2, Daringfu 1-1-1-1-1, midopy 1-0-0	Medoba1/2-1/2-1/2	jingyu1200-40 Lead；SR1101	STN	monopole	C+			2-						130	70	1.5		C+		5-							140	70	1.6
		Liu Huanyin	Liu Huanyin	Female	71	PD	9	Hebei	2023-11-17	Dyskinesia	Dyskinesia	Yes	No	Level 2	15931377365	2024-11-17	Medoba 3/4-3/4-3/4, Xi Ning 0-0-0-1, Senforo (0.25mg) 1-1-1, Quetiapine 0-0-0-1	Medoba3/4-3/4-3/4，Xi Ning0-0-0-1，Senforo（0.25mg）1-1-1，Quetiapine0-0-0-1	Pingchi.1200-40 Lead；SR1101	STN		C+			3-						130	70	1.8
		Liu Huanyin	Liu Huanyin	Female	71	PD	9	Hebei	2023-11-17	Dyskinesia	Dyskinesia	Yes	No	Level 2	15931377365	2024-11-17	Medoba 3/4-3/4-3/4, Xi Ning 0-0-0-1, Senforo (0.25mg) 1-1-1, Quetiapine 0-0-0-1	Medoba3/4-3/4-3/4，Xi Ning0-0-0-1，Senforo（0.25mg）1-1-1，Quetiapine0-0-0-1	Pingchi.1200-40 Lead；SR1101	STN		C+		2-							130	60	0.8
		Luo Xuefeng	Luo Xuefeng	Male	60	PD	7	Yunnan	2023-11-16	End-of-dose, dyskinesia	End-of-dose, dyskinesia	Yes	Yes	Level 1	18908729190	2024-11-16	Medoba 3/4-3/4-3/4-3/4, Teshuda 1-1-1-1, Clozapine 0-0-0-1/4, amantadine 1-1-1/2, Daringfu 1/2-1/2-1/2-1/2	Medoba3/4-3/4-3/4-3/4，Teshuda1-1-1-1，Clozapine0-0-0-1/4，amantadine1-1-1/2，Daringfu1/2-1/2-1/2-1/2	Pingchi.1200-40 Lead；SR1101	STN	monopole	C+			3-						130	70	1.7	914	C+			7-						130	70	1.4	889
		Zhou Shuqin	Zhou Shuqin	Female	43	Dystonia	10	Jiangxi	2023-12-24	Muscle tone disorder	-	No	No	Level 2	18679467902	2024-11-24	No	No	Jing Yu，1210-40	GPi	monopole	C+	0-								130	90	1.5		C+		5-							130	90	2
		Zhou Yongping	Zhou Yongping	Female	57	PD	17	ningbo	2023-11-23	Dyskinesia, freezing	Dyskinesia, freezing	Yes	Yes	Level 1	18257342713	2024-11-23	Medoba 1/4-1/4-1/4	Medoba1/4-1/4-1/4	Medtronic, 3389S, RC	STN	monopole	C+			2-						130	60	1.3	1204	C+				11-					130	60	1.1	1820
		He Zhuqin	He Zhuqin	Female	73	PD	10	chekiang	2023-11-24	End of the dose, abnormal movement, postural hypotension, frequent urination	End-of-dose, dyskinesia	Yes	No	Level 2	13858502826	2024-11-24	Medoba 3/4-3/4-3/4-3/4, Kedan 3/4-3/4-3/4, Xi Ning 1/2-3/4-3/4, Senforo (0.25mg) 1-1-1, amantadine 1-1-1	Medoba1/2-1/2-1/2	Medtronic, 3389S, RC	STN	monopole	C+		1-							130	60	1.2	1862	C+		9-							130	60	1.5	1343
		Wu Xuephosphorus	Wu Xuephosphorus	Male	57	PD	8	chekiang	2023-11-24	Slow, stiff, wearing off, end of the dose, freezing	end of the dose, freezing	Yes	No	Level 2	15925778807	2024-11-24	Medoba 3/4-3/4-3/4-3/4, amantadine 1-1-0, Prapexor (0.25mg) 2-2-2	Medoba1/2-1/2-1/2	Pingchi.1200-40 Lead；SR1101	STN	monopole	C+			3-						130	70	1.8v		C+		6-							130	60	1.6v	1037
		Medfa	Medfa	Male	68	PD	7	chekiang	2023-11-27	Tremor, slowness, rigidity, wearing off, dyskinesia	End-of-dose, dyskinesia	Yes	No	Level 2	15967931028	2024-11-27	Medoba 1/2-1/2-1/2, Xi Ning 1/2-0-1/2, Prapexor (0.25mg) 3-3-3	Medoba1/4-1/4-1/4	Pingchi.1200-40 Lead；SR1101	STN															C+			7-						130	60	1.6v	1463
		Du Development (not found)	Du Kaifa (not found)	Male		PD		Jiangsu	2023-07-27		Family history	Yes	Yes	Level 1	15861701463	2024-07-27
		Yuan Guobin	Yuan Guobin	Male	60	PD	7	Henan	2023-11-29	Wearing off	Wearing off	Yes	No	Level 2	15838023152	2024-11-29	Medoba 1/2-1/2-1/2, Xi Ning 1/2-0-1/2, amantadine 1-1-1	Medoba1/2-1/2-1/2，Xi Ning1/2-0-1/2，amantadine1-1-1	Pingchi.1200-40 Lead；SR1101	STN	monopole	C+		2-							130	60	1.6		C+		6-							130	60	1.9
		Hua Guoxiang	Hua Guoxiang	Male	63	PD	6	Jiangsu	2023-11-30	Tremor, wearing off	Wearing off	No	No	Level 3	13861101711	2024-11-30	Xi Ning 1/2-1/2-1/2, Teshuda 1/2-0-1/2, diphenhydroxysol 1/2-0-1/2	Xi Ning1/2-1/2-1/2，Teshuda1/2-0-1/2，diphenhydroxysol 1/2-0-1/2	jingyu1200-40 Lead；SR1101	STN	monopole	C+		1-							130	60	1.5		C+		5-							130	60	1
		MOLYNEAUX PATTY	MOLYNEAUX PATTY	Female	78	PD	13	Shanghai	2023-12-05	Trembling, slowness, end of the dose, freezing, abnormal movement, forward lunge	end of the dose, freezing, Abnormal movement	Yes	Yes	Level 1	18187880602	2024-12-05	Xi Ning (American version) 2-2-2-2	Xi Ning(American version)2-2-2-2	Medtronic, 3389S, RC	STN	monopole	C+			2-						140	60	1.3mA		C+			10-						140	60	1.5mA
		Wang Zhengfu	Wang Zhengfu	Male	68	PD	12	Henan	2023-12-04	Slowness, poor balance, stiffness, wearing off, hallucinations	Decreased efficacy	Yes	No	Level 2	15921387568	2024-12-04	Medoba 3/4-3/4-3/4-3/4, amantadine 1-1-1, diphenhydroxysol 1/2-0-0, Daringfu 1/2-1/2-1/2-1/2, Clozapine 1/4-0-1/2	Medoba1/2-1/2-1/2，amantadine1-0-1，Clozapine0-0-0-1/2(Preparation)	Pingchi.1200-40 Lead；SR1101	STN	monopole	C+				4-					125	60	1.5	935	C+		6-							125	70	2.6	779
		Wang Zhengfu	Wang Zhengfu	Male	68	PD	12	Henan	2023-12-04	Slowness, poor balance, stiffness, wearing off, hallucinations	Decreased efficacy	Yes	No	Level 2	15921387568	2024-12-04	Medoba 3/4-3/4-3/4-3/4, amantadine 1-1-1, diphenhydroxysol 1/2-0-0, Daringfu 1/2-1/2-1/2-1/2, Clozapine 1/4-0-1/2	Medoba1/2-1/2-1/2，amantadine1-0-1，Clozapine0-0-0-1/2(Preparation)	Pingchi.1200-40 Lead；SR1101	STN		C+			3-						125	60	0.6	897
		Mr albert	Mr albert	Female	64	PD	8	chekiang	2023-12-07	End of the dose, abnormal movement, hallucinations	End-of-dose, dyskinesia	Yes	No	Level 2	13587509543	2024-12-07	Medoba 1/2-1/2-1/2, Xi Ning 1/2-1/2-1/2, amantadine 1-1-1, Resa Gilan 1-1-1-1, Kedan 1/2-1/2-1/2, Prapexor (0.25mg) 2-2-2	Medoba1/2-1/2-1/2	Medtronic, 3389S, RC	STN	monopole	C+				3-					130	60	1.1	1884（0.6mA）	C+			10-						130	60	1.1	1494（0.8mA）
		Chen Wenzhi	Chen Wenzhi	Male	24	Dystonia，schizophrenia	1	Fujian	2023-12-12	-	-	Yes	Yes	Level 1	18859112309	2024-12-12	No	No	Jing Yu，1210-40	GPi	monopole														C+	8-								130	90	2
		Liu Huijun	Liu Huijun	Female	24	Torsion spasm	20	Fujian	2023-12-26	Postoperative microlesion effect (+), right limb weight (+), gene (-)	-	No	No	Level 2	15260908882	2024-12-26	No	No	Pingchi.1200-40 Lead；SR1101	GPI	monopole	C+		2-							130	60	1.5		C+		6-							130	60	1
			MOLYNEAUX PATTY+E348:EE348:E356	Female	78	PD	13	Shanghai	2023-12-05	End-of-dose, dyskinesia	End-of-dose, dyskinesia	Yes	Yes	Level 1	18187880602	2024-12-05	Xi Ning (American version) 1-1-1-1	Xi Ning(American version)1-1-1-1	Medtronic, 3389S, RC	STN	monopole	C+			2-						120	60	0.6mA		C+			10-						120	70	0.6mA
			MOLYNEAUX PATTY	Female	78	PD	13	Shanghai	2023-12-05	End-of-dose, dyskinesia	End-of-dose, dyskinesia	Yes	Yes	Level 1	18187880602	2024-12-05	Xi Ning (American version) 1-1-1-1	Xi Ning(American version)1-1-1-1	Medtronic, 3389S, RC	STN	monopole	C+				3-					120	60	0.9mA		C+				11-					120	60	0.9mA
		Chen Biqing		Male	66	PD	15	Shanghai	2024-12-13	Tremor, wearing off	Wearing off	Yes	Yes	Level 1	13761039703	2025-12-13	Medoba 1-1-1, Prapexor (0.25mg) 1-1-1, Vitamin B6 1-1-1	Medoba1/2-1/2-1/2	jingyu1200-40 Lead；SR1101	STN	monopole	C+		1-							140	60	1.2		C+		5-							130	60	1
		Cai Xinhua		Female	49	Meige	1	Jiangxi	2023-12-15	-	-	No	No	Level 2	13362892203	2024-12-15	Baclofen 1/2-1/2-1/2, Tipride 1-1-1	Baclofen1/2-1/2-1/2，Tipride1-1-1	Pingchi.1200-40 Lead；SR1101	No records	monopole	C+	1-								130	90	1.5	1318	C+	5-								130	90	1.5	1179
		Zhang Shuihua		Female	65	PD	10	Hangzhou	2023-02-07	-	-	Yes	Yes	Level 1	15258804810	2025-02-07	Medoba 1/2-1/2-1/2-1/2-1/2, Senforo (0.75mg) 1/2-1/2	Medoba1/2-1/2-1/2-1/2-1/2，Senforo（0.75mg）1/2-1/2	Pingchi.1200-40 Lead；SR1101	STN	cross	C+			3-						vfs	70	2	1086	C+			7-						vfs	60	2	1027
		Zhang Shuihua		Female	65	PD	10	Hangzhou	2023-02-07	-	-	Yes	Yes	Level 1	15258804810	2025-02-07	Medoba 1/2-1/2-1/2-1/2-1/2, Senforo (0.75mg) 1/2-1/2	Medoba1/2-1/2-1/2-1/2-1/2，Senforo（0.75mg）1/2-1/2	Pingchi.1200-40 Lead；SR1101	STN	cross	C+	1-								vfs	70	2.5	1217	C+	5-								vfs	60	2	1238
		Jiang Jinshun		Male	67	PD	12	Shanghai	2023-12-18	Wearing off	Wearing off	Yes	No	Level 2	13917617178	2024-12-18	Medoba1/2-1/2-1/2-1/2, Prapexor (0.375mg) 1-0-1, Xi Laimei1/2-1/2-1/2, Ntakapong1/2-1/2-1/2	Medoba1/2-1/2-1/2-1/2，Prapexor（0.375mg）1-0-1，Xi Laimei1/2-1/2-1/2，Ntakapong1/2-1/2-1/2	Pingchi.1200-40 Lead；SR1101	STN	cross	C+				4-					130	70	2	1152	C+			7-						130	70	1.8	945
		Jiang Jinshun		Male	67	PD	12	Shanghai	2023-12-18	Wearing off	Wearing off	Yes	No	Level 2	13917617178	2024-12-18	Medoba1/2-1/2-1/2-1/2, Prapexor (0.375mg) 1-0-1, Xi Laimei1/2-1/2-1/2, Ntakapong1/2-1/2-1/2	Medoba1/2-1/2-1/2-1/2，Prapexor（0.375mg）1-0-1，Xi Laimei1/2-1/2-1/2，Ntakapong1/2-1/2-1/2	Pingchi.1200-40 Lead；SR1101	STN	cross	C+			3-						130	60	0.6	1917	C+
		Shi Shengde		Male	76	PD	15	chekiang	2023-12-14	End of the dose, abnormal movement, hallucinations, freezing, eyelid spasm	end of the dose, Abnormal movement, hallucinations	Yes	Yes	Level 1	13024117020	2024-12-14	Medoba1/2-1/2-1/2, Xi Ning1/2-1/2-1/2-1/2, Prapexor (0.75mg) 1-1-1-1, Sertraline 0-0-0-1, Ntakapong1-1-1, Clozapine 0-0-0-1/4	Medoba1/2-1/2-1/2，Xi Ning1/2-1/2-1/2-1/2，Prapexor（0.75mg）1-1-1-1，㑭ᥒ᧷0-0-0-1，Ntakapong1-1-1，Clozapine0-0-0-1/4	Medtronic, 3389S, RC	STN	monopole	C+			2-						130	70	1.1mA		C+			10-						130	70	1.2mA
		Chen Yuehua		Female	73	PD	15	Shanghai	2023-12-21	-	-	Yes	Yes	Level 1	13311630977	2024-12-21	No	No	Pingchi.1200-40 Lead；SR1101	STN	monopole	C+			3-						130	70	1.6	1320	C+			7-						130	70	1.5	1101
		Feng Jihua		Male	40	PD	5	chekiang	2023-01-13	Left limb aching	-	No	No	Level 3	13511269823	2026-01-13	Medoba1/2-1/2-1/4	Medoba1/2-1/2-1/4	Pingchi.1200-40 Lead；SR1101	STN	Double negative	C+		2-							160	70	2.4	1171	C+		6-		8-					160	70	2.7	813
		Wang Wei		Male	47	PD	6	chekiang	2023-09-05	-	Gene	Yes	Yes	Level 1	13567943092	2025-09-05	No	No	Medtronic, 3389S, RC	GPI	monopole	C+		1-							130	70	2.1mA		C+			10-						130	70	2.3mA
		Li Guilan		Female	71	PD	10	Jiangsu	2023-12-20	Trembling, slowness, stiffness, end of the dose, abnormal movement, freezing	end of the dose, Abnormal movement, freezing	Yes	No	Level 2	18913264292	2024-12-20	Medoba3/4-3/4-3/4-3/4, Teshuda 1-0-1, amantadine 1-1-0	Medoba1/2-1/2-1/2，amantadine1-0-1	Medtronic, 3389S, RC	STN	cross	C+		1-							125	60	2	1666	C+		9-							125	70	2	1554
		Li Guilan		Female	71	PD	10	Jiangsu	2023-12-20	Trembling, slowness, stiffness, end of the dose, abnormal movement, freezing	end of the dose, Abnormal movement, freezing	Yes	No	Level 2	18913264292	2024-12-20	Medoba3/4-3/4-3/4-3/4, Teshuda 1-0-1, amantadine 1-1-0	Medoba1/2-1/2-1/2，amantadine1-0-1	Medtronic, 3389S, RC	STN	cross	C+			2-						125	70	2.2	1292	C+				11-					125	60	1	2094
		Xu Hanqiu		Male	76	PD	7	Jiangsu	2023-12-26	Trembling, stiffness, reverse end of the dose	Wearing off	Yes	Yes	Level 1	13063663321	2024-12-26	Silem 1-0-1, Kedan 1-0-1, Prapexor (0.25mg) 1-0-1, Xi Ning 0-0-0-1	Medoba1/2-1/2-1/2，Xi Ning0-0-0-1/2	Pingchi.1200-40 Lead；SR1101	STN	monopole	C+			3-						130	70	1.6	980	C+		6-							130	60	1.3	841
		Xia Jianguo		Male	71	PD	8	Shanghai	2023-12-14	End-of-dose, dyskinesia	End-of-dose, dyskinesia	Yes	Yes	Level 1	18916481392	2024-12-14	Medoba3/4-3/4-3/4, Prapexor (0.25mg) 1-1-1	Medoba1/2-1/2-1/2	Medtronic, 3389S, RC	STN	cross	C+				3-					115	60	1.1	1971	C+			10-						115	60	1.4	1376
		Xia Jianguo		Male	71	PD	8	Shanghai	2023-12-14	End-of-dose, dyskinesia	End-of-dose dyskinesia	Yes	Yes	Level 1	18916481392	2024-12-14	Medoba3/4-3/4-3/4, Prapexor (0.25mg) 1-1-1	Medoba1/2-1/2-1/2	Medtronic, 3389S, RC	STN	cross	C+			2-						115	60	0.4	2178	C+				11-					115	60	0.6	1402
		Kim Jeong-geun		Male	75	Essential tremor	15	Shanghai	2023-12-27	Trembling	-	No	No	Level 2	18918151922	2024-12-27	Primidone 0-0-0-1/2	ᒱ⻓䏎0-0-0-1/2	Medtronic, 3389S, RC	VIM-PSA	cross	C+		1-							130	70	1.5		C+	8-								130	60	2
		Kim Jeong-geun		Male	75	Essential tremor	15	Shanghai	2023-12-27	Trembling	-	No	No	Level 2	18918151922	2024-12-27	Primidone 0-0-0-1/2	ᒱ⻓䏎0-0-0-1/2	Medtronic, 3389S, RC	VIM-PSA															C+		9-							130	70	2
		Zhang Yongfu		Male	48	PD	5	Jiangsu	2024-01-02	Trembling, abnormal movement, end of the dose	Abnormal movement, end of the dose	Yes	No	Level 2	13151310610	2025-01-02	Medoba 1-1-1, Prapexor (0.375mg) 1-0-1, diphenhydroxysol 1/2-0-1/2	Medoba1-1-1，Prapexor（0.375mg）1-0-1，diphenhydroxysol 1/2-0-1/2	Pingchi.1200-40 Lead；SR1101	STN	monopole	C+			3-						130	60	1.2	1462	C+			7-						130	60	1.4	1316
		Wu Zhiyu		Female	62	PD	11	chekiang	2024-01-03	Slow, stiff, freezing	Freezing	Yes	No	Level 2	13857897727	2025-01-03	Medoba1/4-1/4-1/4, Teshuda 1-1-1	Medoba1/4-1/4-1/4，Teshuda1-1-1	Pingchi.1200-40 Lead；SR1101	STN		+		2-							130	60	1.2				6-							130	60	1.5
		Dong Chenxi		Male	19	dystonia	8	Shanghai	2018-09-07	Right neck twist, left leg cannot bend	-	No	No	Level 3	13816920480	No	No	No	Pingchi.1200-40 Lead；SR1101	GPI	monopole	C+		2-							120	170	2.5		C+		6-							120	150	2.2
		Xu Yujuan		Female	71	tremor	5	Jiangsu	2024-01-05	Head trembling, right hand trembling (intention tremor), unclear speech	-	No	No	Level 2	13801506513	2025-01-05	No	No	jingyu1200-40 Lead；SR1101	VIM-PSA	monopole	C+		1-							145	70	2		C+		5-							145	60	0.4
		Zhang Guocheng		Male	68	PD	10	chekiang	2024-01-09	Tremor, slowness, stiffness, dyskinesia	Dyskinesia	Yes	Yes	Level 1	13905801081	2025-01-09	Xi Ning3/4-3/4-3/4, Medoba3/4-3/4-3/4, Teshuda 1-1-1, Clonazepam 1-0-0	Xi Ning3/4-3/4-3/4，Medoba3/4-3/4-3/4，Teshuda1-1-1，Clonazepam1-0-0	Pingchi.1200-40 Lead；SR1101	STN		+		2-							130	60	1.3		+			7-						130	60	1
		Locke's golden law		Male	74	PD	10	chekiang	2024-01-03	Shaking in the left hand and foot, weakness	-	Yes	Yes	Level 1	15355522627	2025-01-03	Medoba1/4-1/4-1/4, Xi Ning1/2-1/2-1/2, Anzi Lai 1-0-0	Medoba1/4-1/4-1/4，Xi Ning1/2-1/2-1/2，Anzi Lai1-0-0	Medtronic, 3389S, RC	STN		+			2-						130	60	0.6		+		5-							130	60	1.4
		Metaphorically speaking, it is a double pillar		Male	66	PD	16	Jiangsu	2024-01-10	Shake, slow, stiff, balance, freeze	Freezing	Yes	No	Level 2	15951769121	2025-01-10	Medoba three-quarters-three-quarters-three-quarters-half, amantadine one-one-one-one	Medoba3/4-3/4-3/4-1/2，amantadine1-1-1-1	Pingchi.1200-40 Lead；SR1101	STN		+		2-							130	70	2				6-							130	70	1.8
		Cai Aile		Female	65	PD	7	chekiang	2024-01-09	Slow, stiff, frozen, heavy on the left side	Freezing	Yes	No	Level 2	13567778832	2025-01-09	Medoba three-quarters-three-quarters-three-quarters, Senforo (0.25mg) one-one-one	Medoba3/4-3/4-3/4，Senforo（0.25mg）1-1-1	Medtronic, 3389S, RC	STN+SNR	monopole	C+			2-						110	60	0.8		C+		9-							110	60	0.6
		Chen Jufen		Female	58	PD	2	chekiang	2024-01-05	Abnormal posture	-	No	No	Level 2	13666832849	2025-01-05	Clonazepam zero-zero-zero-one	Clonazepam0-0-0-1/2	jingyu1200-40 Lead；SR1101	Gpi		+	1-								110	90	1.3		C+	1-								110	90	1.5
		Zhu Aijun		Female	70	PD	3.5	chekiang	2024-01-10	Trembling, chest tightness, salivation, slowness, stiffness	-	Yes	No	Level 2	13291598788	2025-01-10	Medoba one-one-one, Kedan half-half-half, Prapexor (0.25mg) one-and-a-half-one-one-and-a-half	Medoba1-1-1，Kedan1/2-1/2-1/2，Prapexor（0.25mg）3/2-1-3/2	Pingchi.1200-40 Lead；SR1101	STN		+		2-							130	60	1.5		+		6-							130	60	0.8
		Qian Fengying		Female	68	Meige	2	chekiang	2024-01-12	Blepharospasm, fluctuating tongue, pharyngeal discomfort (after 1 month of botulinum toxin)	-	No	No	Level 2	18757779062	2025-01-12	Nemo Horizon one-one-one, methylcobalamin one-one-one	Nemo Horizon1-1-1，methylcobalamin1-1-1	Pingchi.1200-40 Lead；SR1101	GPI	monopole	C+	1-								120	70	1		C+	5-								120	70	1.2
		Baiheti Han Rouzi		Female	65	PD	9	Xinjiang	2024-02-02	Shaking, slow, Abnormal movement	Dyskinesia	Yes	Yes	Level 1	13779683331	2025-02-02	Medoba three-quarters-three-quarters-three-quarters, Prapexor half-half-half, amantadine one-one-zero	Medoba3/4-3/4-3/4，Prapexor1/2-1/2-1/2，amantadine1-1-0	Pingchi.1200-40 Lead；SR1101	STN	monopole	C+			3-						130	60	0.1		C+			7-						130	60	0.2
		Thank you, Jiankui		Male	52	PD	9	Jiangxi	2023-12-29	Slow, frozen, end of the dose	Freezing, wearing off	Yes	No	Level 2	15807016155	2024-12-29	Medoba half-half-half-half, Xi Ning half-half-zero-zero, Prapexor (0.25mg) two-two-two, diphenhydroxysol one-one-one	Medoba1/2-1/2-1/2-1/2，Xi Ning1/2-1/2-0-0，Prapexor（0.25mg）2-2-2，diphenhydroxysol 1-1-1	Pingchi.1200-40 Lead；SR1101	STN	monopole	C+		2-							130	60	1	1979	C+		6-							130	60	2	1630
		Liu Huijun		Female	24	Cerebral palsy - dystonia	20	Fujian	2023-12-26	-	-	No	No	Level 2	15160232263	2024-12-26	No	No	Pingchi.1200-40 Lead；SR1101	GPI	monopole	C+		2-							130	60	1.5		C+		6-							130	60	1
		Liu Huijun		Female	24	Cerebral palsy - dystonia	20	Fujian	2023-12-26	-	-	No	No	Level 2	15160232263	2024-12-26	No	No	Pingchi.1200-40 Lead；SR1101	GPI	cross	C+		2-							130	90	1.5		C+		6-							130	90	1.2
		Liu Huijun		Female	24	Cerebral palsy - dystonia	20	Fujian	2023-12-26	-	-	No	No	Level 2	15160232263	2024-12-26	No	No	Pingchi.1200-40 Lead；SR1101	GPI	cross	C+	1-								130	60	1
		Li Chang agreed		Male	64	PD	8	chekiang	2023-12-28	Stiff, end of the dose, Abnormal movement	End-of-dose dyskinesia	Yes	No	Level 2	13750875482	2024-12-28	Medoba half-half-half, Daringfu half-half-half-half, Teshuda one-zero-one, Resa Gilan one-one-one-one, Clozapine zero-zero-zero-three-quarters	Medoba1/4-1/4-1/4，Teshuda1-0-1，Clozapine0-0-0-1/2	Pingchi.1200-40 Lead；SR1101	STN	monopole	C+			3-						120	60	1.4	1141	C+				8-					120	60	1.1	875
		Li Shude		Male	79	PD	8	Liaoning	2024-01-29	Shaking, slow, stiff, frozen, end of the dose	Freezing, wearing off	Yes	No	Level 2	18101717739	2025-01-29	Medoba one-one-one-one, Senforo (0.25mg) one-one-one-one	Medoba1-1-1-1，Senforo（0.25mg）1-1-1-1	Medtronic, 3389S, RC	STN		+		1-							130	60	1.5		+		5-							130	60	1.6
		Song Weijun		Male	68	PD	10	Hebei	2024-01-16	Left hand shaking, slurred speech, freezing, pain in all four limbs	Freezing	Yes	Yes	Level 1	15350892918	2025-01-16	Medoba half-half-half-half, Kedan half-half-half, Teshuda half-half-half-half, diphenhydroxysol half-zero-half, Clozapine half-zero-half	Medoba1/4-1/4-1/4	Pingchi.1200-40 Lead；SR1101	STN	monopole	C+		2-							130	60	0.6		C+			7-						130	60	1.2
		Zhou Shijie		Male	55	PD	7	Fujian	2024-01-16	Right limb shaking with pain, reduced efficacy, Abnormal movement	Dyskinesia	Yes	Yes	Level 1	13505001147	2025-01-16	Medoba half-half-half-half-half-half-half-half-half-half-half, Ntakapong one-one-one, Senforo (0.25mg) one-one-one	Medoba1/2-1/2-1/2-1/2-1/2-1/2-1/2-1/2-1/2-1/2，Ntakapong1-1-1，Senforo（0.25mg）1-1-1	Medtronic, 3389S, RC	STN	monopole	C+			2-						130	60	2.2MA		C+		9-							130	60	0.2MA
		Wang Haiyan		Female	42	Meige	3	Jiangsu	2024-01-17	Eyelid spasm, more severe on the left side	-	No	No	Level 2	15862346669	2025-01-17	No	No	Medtronic, 3389S, RC	GPI	monopole	C+		1-							110	90	1		C+		9-							110	90	1.2
		Rui Guihua		Male	59	dystonia	15	Shanghai	2024-01-09	-	-	Yes	Yes	Level 1	13818020589	2025-01-09	No	No	jingyu1200-40 Lead；SR1101	Gpi		C+		1-							130	80	1.5				5-							130	90	1.5
		Rui Guihua		Male	59	dystonia	15	Shanghai	2024-01-09	-	-	Yes	Yes	Level 1	13818020589	2025-01-09	No	No	jingyu1200-40 Lead；SR1101	Gpi				1-							130	80	1.5				5-							130	90	2
		Li Ming		Male	37	PD	20	Shanghai	2023-01-06	Dyskinesia	Dyskinesia	Yes	Yes	Level 1	13901924829	2025-01-06	diphenhydroxysol one-one-one, amantadine two-zero-two, Rothigottin (4mg patches) every other day	diphenhydroxysol 1-1-1，amantadine2-0-2，Rothigottin（4mgpatches）qod	Pingchi.1200-40 Lead；SR1101	STN	cross	C+				4-					vfs	70	2.1		C+				8-					vfs	90	3
		Li Ming		Male	37	PD	20	Shanghai	2023-01-06	Dyskinesia	Dyskinesia	Yes	Yes	Level 1	13901924829	2025-01-06	diphenhydroxysol one-one-one, amantadine two-zero-two, Rothigottin (4mg patches) every other day	diphenhydroxysol 1-1-1，amantadine2-0-2，Rothigottin（4mgpatches）qod	Pingchi.1200-40 Lead；SR1101	STN	cross	C+		2-							vfs	60	1				6+	7-						vfs	60	2.1
		Yang Lixia		Female	69	PD	10	Anhui	2024-01-26	Tremor, slow, stiff, freezing	Freezing	Yes	No	Level 2	13965959108	2025-01-26	Medoba1-1-1-1-3/4-1, Senforo (0.25mg) 1-1-1-1/2, Clozapine 0-0-0-1/4, Xi Ning (03:00) 1/2	Medoba1-1-1-1-3/4-1，Senforo（0.25mg）1-1-1-1/2，Clozapine0-0-0-1/4，Xi Ning（03:00） 1/2	Medtronic, 3389S, RC	STN		+		1-							130	60	1.5		+		9-							130	60	1.8
		Zhang Jinhua		Female	65	PD	5	chekiang	2024-01-15	Shaking, slow, stiff, frozen, end of the dose, balance	Freezing, wearing off	Yes	Yes	Level 1	18662352399	2025-01-15	No	No	jingyu1200-40 Lead；SR1101	STN		+			2-						135	60	1.5		+			6-						130	60	1.1
		Tang Lingling		Female	59	PD	5	Jiangsu	2024-01-19	Slow, stiff, on-off phenomenon, pain during off period	On-off	Yes	No	Level 2	13626251273	2025-01-19	Medoba 1-1-1-1, diphenhydroxysol 1-1-1	Medoba1-1-1-1，diphenhydroxysol 1-1-1	Pingchi.1200-40 Lead；SR1101	STN	monopole	C+	1-								120	90	2.3		C+		6-							120	90	1.8
		Fan Xiancang		Male	60	PD	10	Anhui	2024-01-19	Slow, stiff, end of the dose, Abnormal movement	End-of-dose dyskinesia	Yes	Yes	Level 1	13965161150	2025-01-19	Medoba 1-1-1, Xi Ning 1/2-1/2-1/2, Senforo (0.25mg) 1-0-1, diphenhydroxysol 1/2-0-1/2, Vitaminb6 1-1-1	Medoba1/2-1/2-1/2	Pingchi.1200-40 Lead；SR1101	STN	monopole	C+			3-						140	60	1.5		C+			7-						140	60	1.5
		Chen Ranghe		Male	72	PD	8	chekiang	2024-01-22	Slow, stiff, fatigue, on-off phenomenon, end of the dose, freezing	end of the dose, freezing, on-off	Yes	No	Level 2	15868599699	2025-01-22	Medoba 3/4-3/4-3/4	Medoba1/4-1/4-1/4-1/4	Pingchi.1200-40 Lead；SR1101	STN		+		2-							130	60	1.2		+			7-						130	60	1.6
		Chen Ranghe		Male	72	PD	8	chekiang	2024-01-22	Slow, stiff, fatigue, on-off phenomenon, end of the dose, freezing	end of the dose, freezing, on-off	Yes	No	Level 2	15868599699	2025-01-22	Medoba 3/4-3/4-3/4	Medoba1/4-1/4-1/4-1/4	Pingchi.1200-40 Lead；SR1101	STN		+		2-							130	60	1.5		+			7-						130	60	1.9
		Xu Jinyuan		Male	68	PD	8	Jiangsu	2024-01-31	-	-	Yes	Yes	Level 1	13862601058	2025-01-31	Medoba 1/2-1/2-1/2, Senforo (0.25mg) 2-2-2, Daringfu 1-1-1	Medoba1/2-1/2-1/2，toterodine0-0-0-1	Medtronic, 3389S, RC	STN	monopole	C+		1-							130	60	1.2v	1642（0.7mA）	C+		9-							130	60	1.4v	1155（1.2mA）
		Chen Lei		Male	52	PD	10	chekiang	2024-01-25	Slow, stiff, Abnormal movement, reduced efficacy, more pronounced on the left side	Abnormal movement, efficacy reduction	Yes	No	四级	13968865879		Medoba 1/2-1/2-1/2-1/2, Xi Ning 1/2-1/2-1/2-1/2, Kedan 1/2-1/2-1/2-1/2, amantadine 1-1-0, Senforo (0.25mg) 1-1-1-1, diphenhydroxysol 1/2-1/2-1/2	Medoba1/4-1/4-1/4	Pingchi.1200-40 Lead；SR1101	STN	cross	C+			3-						130	60	1.3	1518	C+		6-							130	60	2	1035
		Chen Lei		Male	52	PD	10	chekiang	2024-01-25	Slow, stiff, Abnormal movement, reduced efficacy, more pronounced on the left side	Abnormal movement, efficacy reduction	Yes	No	四级	13968865879		Medoba 1/2-1/2-1/2-1/2, Xi Ning 1/2-1/2-1/2-1/2, Kedan 1/2-1/2-1/2-1/2, amantadine 1-1-0, Senforo (0.25mg) 1-1-1-1, diphenhydroxysol 1/2-1/2-1/2	Medoba1/4-1/4-1/4	Pingchi.1200-40 Lead；SR1101	STN	cross	C+			3-						130	60	1.1		C+			7-						130	60	1.3
		Zhu Xingxiang	2024-02-26	Male	53	PD	4	chekiang	2024-01-26	Left limb tremor, rigidity, slow movement	-	Yes	No	Level 2	13757311699	2025-01-26	Medoba 1/2-1/2-1/2-1/2-1/2, Xi Ning 1/2-1/2-1/2-1/2-1/2, Prapexor (0.25mg) 1-1-1	Medoba1/4-1/4-1/4	jingyu1200-40 Lead；SR1101	STN	monopole	C+		1-							130	60	1		C+			6-						150	60	1.5
		Jizu Tai	2024-02-26	Male	73	PD	7	Shanghai	2024-01-22	Slow, rigid, drug effect waning, Abnormal movement, freezing, difficulty turning over (more obvious on the left)	Dyskinesia, freezing	Yes	No	Level 2	13601715791	2025-01-22	Medoba 3/4-3/4-1/2, Kedan 1-1-1, Xi Ning 0-1-0, Prapexor (0.25mg) 0-0-0-2, Daringfu 0-0-0-1	Medoba1/2-1/2-1/2，Prapexor（0.5mg）1-1-1-1	Pingchi.1200-40 Lead；SR1101	STN	monopole	C+				3-					100	90	2		C+			7-						100	90	2.5
		Hu Shaofeng	2024-02-27	Male	61	PD	5	Hubei	2024-01-24	Slow, stiff	-	Yes	Yes	Level 1	19512325830	2025-01-24	Medoba 3/4-3/4-3/4-3/4, Xi Ning 1/2-1/2-1/2, Prapexor (0.25mg) 1-1-1	Medoba1/2-1/2-1/2	Medtronic, 3389S, RC	STN	monopole	C+		1-							120	60	1.3		C+			10-						120	80	1.8
		What a chrysanthemum girl	2024-02-27	Female	61	Meige	5	chekiang	2024-01-26	Eyelid spasm (more obvious on the right)	-	No	No	Level 2	15024696660	2025-01-26	No	No	jingyu1200-40 Lead；SR1101	Gpi	monopole	C+	0-								120	80	1.5		C+	4-								120	80	1.3
		Zhao Shituan	2024-02-29	Male	66	PD	8	Shanghai	2024-01-23	Slow, stiff, on-off phenomenon, Abnormal movement, more obvious on the left	On-off, dyskinesia	Yes	No	Level 2	13564115571	2025-01-23	Medoba 1-1-1-1, Kedan 1/2-1/2-1/2-1/2, Prapexor (0.25mg) 3/2-0-0, Slaiglan 1-1-0	Medoba1/4-1/4-1/4	Pingchi.1200-40 Lead；SR1101	STN	monopole	C+			-						130	60	1.1		C+			-						130	60	1.3
		Yang Guofu	2024-03-04	Male	76	PD	9	Anhui	2024-02-01	End of dose, pain	Wearing off	Yes	Yes	Level 1	15956627958	2025-02-01	Medoba1-1-1, amantadine1-0-1, Prapexor (0.25mg) 1-0-1	Medoba1-1-1，amantadine1-0-1，Prapexor（0.25mg）1-0-1	Medtronic, 3389S, RC	STN	monopole	C+		1-							130	60	1.2		C+		9-							130	60	1
		Wang Rongfang	2024-03-05	Male	72	PD	8	chekiang	2024-01-30	Rigidity, freezing gait	Freezing	Yes	Yes	Level 1	13567997738	2025-01-30	Medoba1/2-1/2-1/2-1/2, Daringfu2-2-2	Medoba1/2-1/2-1/2-1/2，Daringfu2-2-2	jingyu1200-40 Lead；SR1101	STN	monopole	C+		1-							130	60	2		C+			6-						120	90	2.5
		Yan Jinfang	2024-03-05	Male	50	HD	4	Jiangsu	2024-01-29	Increased muscle tone in the right hand	-	No	No	Level 2	13967104081	2025-01-29	No	No	jingyu1200-40 Lead；SR1101	Gpi	monopole	C+	0-								130	90	2		C+	4-								130	90	2
		Shen Jiansheng	2024-03-06	Male	67	PD	16	chekiang	2024-02-03	Wearing off	Wearing off	Yes	No	Level 2	13757077638	2025-02-03	Medoba1/2-1/2-1/2-1/2, Slaiglan1-0-1, Senforo (0.25mg) 1-1-1, amantadine1-0-1	Medoba1.2-1/2-1/2	Medtronic, 3389S, RC	STN	monopole	C+		2-							130	70	1.6	1311（1.1mA)	C+			10-						130	70	1.6	1698 (0.7mA)
		Tan Cai Xing	2024-03-06	Male	63	PD	10	chekiang	2024-02-04	Wearing off	Wearing off	Yes	No	Level 2	13157098640	2025-02-04	Medoba1/2-1/2-1/2, Senforo (0.25mg) 1-1-1, amantadine1-0-1, Kedan1/2-1/2-1/2, midopy1-0-1	Medoba1.2-1/2-1/2	Medtronic, 3389S, RC	STN	monopole	C+			2-						130	60	1.2	1492（0.8mA）	C+		9-							130	60	1.1	1723（0.6mA）
		Hu Xuezhai	2024-03-07	Male	55	PD	8	Chongqing	2024-02-02	End-of-dose, dyskinesia	End-of-dose dyskinesia	Yes	No	Level 2	15002385035	2025-02-02	Medoba1/4-1/4-1/4-1/4-1/4, Xi Ning1/2-1/2-1/2-1/2-1/2, Senforo (0.25mg) 1-0-1	Medoba1/4-1/4-1/4-1/4-1/4-1/4，Xi Ning1/2-1/2-1/2-1/2-1/2-1/2，Senforo（0.25mg）1-0-1	Medtronic, 3389S, RC	STN	monopole	C+		1-							130	60	1.1		C+		9-							130	60	1.3
			2024-03-12	Female	61	PD	9	chekiang	2023-06-26	-	-	Yes	Yes	Level 1	13605779660	2025-06-26	Medoba1/4-1/4-1/4, Xi Ning0-0-0-1/2, Zuo Luo Fu1-0-0	Medoba1/4-1/4-1/4，Xi Ning0-0-0-1/2，Zuo Luo Fu1-0-0	Pingchi.1200-40 Lead；SR1101	STN	cross	C+			3-						vfs	60	2.25		C+		6-							vfs	70	2.7
			2024-03-12	Female	61	PD	9	chekiang	2023-06-26	-	-	Yes	Yes	Level 1	13587968927	2025-06-26	Medoba1/4-1/4-1/4, Xi Ning0-0-0-1/2, Zuo Luo Fu1-0-0	Medoba1/4-1/4-1/4，Xi Ning0-0-0-1/2，Zuo Luo Fu1-0-0	Pingchi.1200-40 Lead；SR1101	STN	cross	C+		2-							vfs	70	2
			2024-03-12	Male	55	PD	7	chekiang	2023-03-13	-	-	Yes	No	Level 2	13665759543	2025-03-13	No	No	Pingchi.1200-40 Lead；SR1101	STN	cross	C+			3-						130	70	2.8	1340	C+		6-							130	70	3	1406
			2024-03-12	Male	55	PD	7	chekiang	2023-03-13	-	-	Yes	No	Level 2	13665759543	2025-03-13	No	No	Pingchi.1200-40 Lead；SR1101	STN	cross	C+		2-							130	60	2.5	1594	C+			7-						130	70	2.8	1538
			2024-03-14	Male	69	PD	13	chekiang	2023-03-17	-	-	Yes	No	Level 2	13184388303	2025-03-17	Medoba1/4-1/4-1/4	Medoba1/2-1/2-1/2	Pingchi.1200-40 Lead；SR1101	STN	cross	C+		2-							125	70	2.6	1052	C+		6-							125	70	2.7	1238
			2024-03-14	Male	69	PD	13	chekiang	2023-03-17	-	-	Yes	No	Level 2	13184388303	2025-03-17	Medoba1/4-1/4-1/4	Medoba1/2-1/2-1/2	Pingchi.1200-40 Lead；SR1101	STN	cross	C+			3-						125	70	2.6	979	C+			7-						125	70	2.8	1400
		Zhang Weimin	2024-03-20	Male	43	PD	8	chekiang	2024-02-23	Wearing off	Wearing off	Yes	Yes	Level 1	18367619108	2025-02-23	Medoba1/2-1/2-1/2, Xi Ning1/2-1/2-1/2, Prapexor (0.25mg) 1-1-1, sertraline1-1-1	Medoba1/2-1/2-1/2，Xi Ning1/2-1/2-1/2，Prapexor（0.25mg）1-1-1，㑭ᥒ᧷1-1-1	Medtronic, 3389S, RC	STN	monopole	C+		1-							130	60	1		C+		9-							130	70	1.8
		Xiang Linyong	2024-03-19	Male	42	PD	6	chekiang	2024-02-22	Wearing off	Wearing off	Yes	Yes	Level 1	18957253312	2025-02-22	Medoba1/2-1/2-1/2-1/2, diphenhydroxysol 1/2-1/2-1/2, amantadine1/2-1/2-1/2, Teshuda1-1-1, Daringfu1-0-0	Medoba1/2-1/2-1/2-1/2，diphenhydroxysol 1/2-1/2-1/2，amantadine1/2-1/2-1/2，Teshuda1-1-1，Daringfu1-0-0	Medtronic, 3389S, RC	STN	monopole	C+				3-					180	80	2.4	1562（1.5ma）	C+		9-							180	60	1.2	847（1.4ma）
		Yue Huijuan	2024-03-20	Female	59	ET	7	Jiangsu	2022-11-08	Speech tremor	Gene	No	No	Level 3	13812752331	2025-11-08	No	No	jingyu1200-40 Lead；SR1101	VIM-PSA		C+	-	-							185	90	3.3		C+	-								170	60	3.3
		Zhu Huabin	2024-03-20	Male	46	Meige	8months	Jiangsu	2024-02-20			No	No	Level 2	13862851835	2025-02-20			Medtronic, 3389S, RC	STN
		Zhu Huashan	2024-03-20	Male	49	Meige	2	Jiangsu	2024-02-23	Meige	-	No	No	Level 2	15251316104	2025-02-23	No	No	Medtronic, 3389S, RC	GPI	monopole	C+	0-								130	90	1.5	1337（1.1mA)	C+	8-								130	90	1.5	1218(1.2mA）
		Shen Kemin	2024-03-25	Female	45	Meige	1	Anhui	2024-02-26	-	-	No	No	Level 2	18796899069	2025-02-26	No	No	Pingchi.1200-40 Lead；SR1101	GPI		C+	1-								130	70	1.5v	1055	C+		6-							130	80	1.5	1318
		Xiong Guangming	2024-03-26	Male	55	PD	6	Jiangxi	2024-02-27	Tremor, rigidity, Abnormal movement, end of the dose, right eyelid spasm	Abnormal movement, end of the dose	Yes	Yes	Level 1	18970063210	2025-02-27	Daringfu1-1-1-1, diphenhydroxysol 1/2-1/2-1/2, Teshuda1-1-1	Daringfu1-1-1-1，diphenhydroxysol 1/2-1/2-1/2	Pingchi.1200-40 Lead；SR1101	STN	cross	C+			3-						180	60	1.5v	1876	C+		6-							180	60	1	1306
		Xiong Guangming	2024-03-26	Male	55	PD	6	Jiangxi	2024-02-27	Tremor, rigidity, Abnormal movement, end of the dose, right eyelid spasm	Abnormal movement, end of the dose	Yes	Yes	Level 1	18970063210	2025-02-27	Daringfu1-1-1-1, diphenhydroxysol 1/2-1/2-1/2, Teshuda1-1-1	Daringfu1-1-1-1，diphenhydroxysol 1/2-1/2-1/2	Pingchi.1200-40 Lead；SR1101	STN	cross														C+				8-					180	80	2.4	1226
		Zhu Yongmei	2024-03-27	Female	62	PD	10	Jiangsu	2024-02-27	Tremor, wearing off	Wearing off	Yes	Yes	Level 1	13915185798	2025-02-27	Medoba1/2-1/2-1/2, Kedan1-1-0, Resa Gilan1-0-0, Prapexor (0.75mg)	Medoba1/2-1/2-1/2	Pingchi.1200-40 Lead；SR1101	STN	monopole	C+			3-						130	60	1	1925	C+		6-							130	70	2	1123
		Zhu Congsheng	2024-03-29	Male	58	PD	7	Jiangsu	2024-02-29	End-of-dose, dyskinesia	End-of-dose, dyskinesia	Yes	Yes	Level 1	13770451369	2025/2/29	Medoba1/4-1/4-1/4, diphenhydroxysol 1-1-1	Medoba1/4-1/4-1/4，diphenhydroxysol 1-1-1	Pingchi.1200-40 Lead；SR1101	STN	monopole	C+			3-						130	60	0.9		C+			7-						130	60	1.3
		Xu Hao	2024-03-28	Male	33	Meige	4months	Jiangsu	2024-03-06	Eyelid spasm, jaw clenching, muscles in front of the neck	-	No	No	Level 2	18211941232	2025-03-06	No	No	Pingchi.1200-40 Lead；SR1101	GPI	monopole	C+	1-								130	90	2.5		C+	5-								130	90	2.5
		Fan Cunlai	2024-04-02	Male	59	PD	9	Jiangsu	2023-03-09	-	-	Yes	Yes	Level 1	15986651739	2025-03-09	Medoba1/4-0-0, Xi Ning1/2-0-0	Medoba1/4-0-0，Xi Ning1/2-0-0	Pingchi.1200-40 Lead；SR1101	STN		C+			3-						130	70	2.5		C+			7-						130	60	2.1
		Fan Cunlai	2024-04-02	Male	59	PD	9	Jiangsu	2023-03-09	-	-	Yes	Yes	Level 1	15986651739	2025-03-09	Medoba1/4-0-0, Xi Ning1/2-0-0	Medoba1/4-0-0，Xi Ning1/2-0-0	Pingchi.1200-40 Lead；SR1101	STN		C+				4-					130	60	1		C+				8-					130	60	1
		Guan Yumei	2024-04-02	Female	71	PD	9	Shanghai	2024-03-01	Pain, muscle stiffness, Abnormal movement, symptoms more severe on the right	Dyskinesia	Yes	No	Level 2	18964640849	2025-03-01	Medoba3/4-3/4-3/4-3/4, Senforo (0.5mg) 1-1-1, Pregabalin 1-0-0	Medoba3/4-3/4-3/4-3/4，Senforo（0.5mg）1-1-1，Pregabalin 1-0-0	Medtronic, 3389S, RC	STN	monopole	C+		1-							130	60	2		C+		9-							130	60	1.7
		Ye Shengbing	2024-04-07	Male	53	PD	6	Jiangsu	2024-03-07	End of the dose, leg aching sensation	Wearing off	Yes	Yes	Level 1	18013285279	2025-03-07	Medoba1-1-1-1, Vitaminb6 1-1-1-1, amantadine1-1-1, Prapexor (0.25mg) 1-1-1-1, Xi Ning1/2-1/2-1/2-1/2, Clozapine 0-0-0-1/2	Medoba1-1-1-1，Vitaminb6 1-1-1-1，amantadine1-1-1，Prapexor（0.25mg）1-1-1-1，Xi Ning1/2-1/2-1/2-1/2，Clozapine0-0-0-1/2	Pingchi.1200-40 Lead；SR1101	STN		+		2-							130	60	1.5		+			7-						130	60	1.5
		Wu Bishuang	2024-04-07	Female	53	Dystonia	1	Fujian	2024-03-04	Spasmodic torticollis	-	No	No	Level 2	15759727355	2025-03-04	No	No	Pingchi.1200-40 Lead；SR1101	GPI	monopole	C+	1-								150	60	1.6		C+	5-								150	70	1.8
		Mao Maozhong	2024-04-08	Male	49	PD	20	Shanghai	2024-03-12	Abnormal movement, tight tongue, chest tightness (main improvement need)	Gene	Yes	Yes	Level 1	18301719325	2025-03-12	Medoba1/2-1/2-1/2, Xi Ning1/2-1/2-1/2, amantadine1-1-0, diphenhydroxysol 1/2-0-1/2, Senforo (0.25mg) 1-0-1, Clozapine 0-0-0-1/4	Medoba1/2-1/2-1/2，Senforo（0.25mg）1-0-1	jingyu1200-40 Lead；SR1101	STN	monopole	C+			2-						130	60	1		C+			6-						130	60	1.3
		Liao Anqin	2024-04-08	Female	48	PD	6	Anhui	2024-03-12	Right lower limb tremor, pain in both upper limbs, Abnormal movement	Dyskinesia	Yes	Yes	Level 1	18386634493	2025-03-12	Teshuda1-0-1, amantadine0-1-1, Medoba1/4-1/4-1/4-1/4, midopy0-1-0	Medoba1/4-1/4-1/4	jingyu1200-40 Lead；SR1101	STN	monopole	C+		1-							130	60	1.5		C+		5-							130	60	1.7
		Zhu Jiancheng	2024-04-08	Male	67	PD	9	Guangdong	2024-03-11	Stiff, slow, end of the dose, propulsion gait	Wearing off	Yes	No	Level 2	18015128118	2025-03-11	Medoba1/4-1/4-1/4, Prapexor (0.25mg) 1-1-1, Daringfu1-1-1, Slaiglan1-0-0, Quetiapine 0-0-0-1/4	Medoba1/4-1/4-1/4	jingyu1200-40 Lead；SR1101	STN	monopole	C+		1-							130	60	1.5		C+		5-							130	60	1.7
		Liu Yanqiang	2024-04-09	Male	55	PD	10	Haikou	2024-03-13	Slow, stiff, freezing, Abnormal movement	Freezing, dyskinesia	Yes	No	Level 2	13136027998	2025-03-13	Medoba1/4-1/4-1/4-1/4, Xi Ning1/2-1/2-1/2-1/2, Prapexor (0.25mg) 1/2-1/2-1/2-1/2, Resa Gilan1-0-0	Medoba1/4-1/4-1/4	Pingchi.1200-40 Lead；SR1101	STN	monopole	C+			3-						120	60	1		C+			7-						120	60	1.3
		Gu Xiuling	2024-04-09	Female	61	PD	10	Jiangsu	2024-03-15	Trembling, rigidity, end of the dose	Wearing off	Yes	No	Level 2	15952277722	2025-03-15	Medoba1/4-1/4-1/4, Xi Ning1-1/2-1, Prapexor (0.25mg) 1/2-1/2-1/2, Teshuda0-1-0	Medoba1/4-1/4-1/4	Pingchi.1200-40 Lead；SR1101	STN	monopole	C+		2-							130	60	1.4		C+		6-							130	60	1.4
		Wang Chenglin	2024-04-09	Female	69	PD	9	Sichuan	2024-03-08	Slow, stiff, end of the dose, difficulty starting, hallucinations	end of the dose, hallucination	Yes	No	Level 2	13550347495	2025-03-08	Medoba1-1-1, Ropinirole (1.5mg) 1-1-1, amantadine1-1-0, Xi Ning0-0-0-1, Vitaminb6 1-1-1	Medoba1/2-1/2-1/2	Medtronic, 3389S, RC	STN	monopole	C+		1-							130	60			C+		9-							130	60
		Su Jiahua	2024-04-15	Male	58	PD	18	Anhui	2024-03-18	Tremor, slow, stiff, Abnormal movement, end of the dose, freezing	Abnormal movement, end of the dose, freezing	Yes	No	Level 2	17755687778	2025-03-18	Medoba3/4-3/4-3/4, Xi Ning0-0-0-1/2, Teshuda0-1-0, Ropinirole1-1-1	Medoba1/4-1/4-1/4➡️Medoba1/2-1/2-1/2️	Pingchi.1200-40 Lead；SR1101	STN	monopole	C+			3-						125	60	1.5	1301	C+			7-						125	60	1.1	740
		Deng Defu	2024-04-15	Male	58	PD	9	Anhui	2024-03-21	End of the dose, stiffness, difficulty in stepping	Wearing off	Yes	Yes	Level 1	18305030894	2025-03-21	Medoba1-1-1-1-1-1, Kedan1/2-1/2-1/2-0-0, Prapexor (0.25mg) 2-2-2, amantadine1-0-1, Vitaminb6 1-1-1	Medoba1-1-1-1-1-1，Kedan1/2-1/2-1/2-0-0，Prapexor（0.25mg）2-2-2，amantadine1-0-1，Vitaminb6 1-1-1	Pingchi.1200-40 Lead；SR1101	STN	monopole	C+		2-							135	60	1.5	1450	C+			7-						135	60	1.6	1114
		The land is about to freeze	2024-04-16	Female	51	Meige	10	Shanghai	2024-03-19	Eyelid twitching	-	No	No	Level 2	13917173296	2025-03-19	diphenhydroxysol 1-1-1, Clonazepam (2mg) 1-0-1	diphenhydroxysol 1-1-1，Clonazepam（2mg）1-0-1	jingyu1200-40 Lead；SR1101	Gpi	monopole	C+	0-								130	60	1.5	980	C+	4-								130	60	1.5	1120
		Long Yusheng	2024-04-16	Male	43	PD	8	Guizhou	2024-03-20	End-of-dose dyskinesia	End-of-dose, dyskinesia	Yes	Yes	Level 1	13595871858	2025-03-20	Xi Ning1/2-1/2-1/2, Medoba1/2-1/2-1/2, Vitaminb6 1-1-1	Medoba1/4-1/4-1/4	jingyu1200-40 Lead；SR1101	STN	monopole	C+			2-						130	60	1.3	1370	C+		5-							130	60	1.3	1370
		Cheng Suzhen	2024-04-18	Female	68	PD	7	Jiangsu	2023-04-27			Yes	Yes	Level 1	18351110487	2025-04-27
		Dong Shuhua	2024-04-17	Female	47	PD	8	chekiang	2023-04-25	-	-	Yes	No	Level 2	13587488035	2025-04-25	No	No	Pingchi.1200-40 Lead；SR1101	STN	monopole	C+		2-							140	70	1.8		C+			7-						140	60	2
		Cheng Shi	2024-04-24	Male	66	PD	10	Jiangsu	2024-03-28	Slow, stiff, end of the dose, freezing, pain	end of the dose, freezing	Yes	No	Level 2	13626221588	2025-03-28	Senforo (0.25mg) 2-2-2, Xi Ning1/2-1/2-1/2, Medoba1-1-1-3/4-1/2	Medoba1/2-1/2-1/2，Senforo1-1-1	Medtronic, 3389S, RC	STN	monopole	C+		1-							130	60	1.5	1158	C+		9-							130	60	1.1	1499
		Cheng Guiqiao	2024-04-24	Female	43	PD	7	chekiang	2024-03-29	Tremor, slow, end of the dose, abnormal movement	End-of-dose, dyskinesia	Yes	No	Level 2	13645893492	2025-03-29	Silem1/2-1/2-0, Kedan1-1-1-1-1, Slaiglan1-0-0, amantadine1-1-0, Xi Ning1/2-0-1/2-0-1/2	Silem1/2-1/2-0，Kedan1-1-1-1-1，Slaiglan1-0-0，amantadine1-1-0，Xi Ning1/2-0-1/2-0-1/2	Medtronic, 3389S, RC	STN	monopole	C+			2-						130	60	0.9mA	1446	C+		9-							130	60	0.8mA	1518
		Zhang Jianhong	2024-04-24	Female	62	PD	15	Jiangsu	2024-03-26	Freezing, end of the dose, tremor	Freezing, wearing off	Yes	No	Level 2	17625038804	2025-03-26	Medoba1/2-1/2-1/2-0, Daringfu0-1-0-1, rotigotine1-0-0	Medoba1/2-1/2-1/2-0，Daringfu0-1-0-1，rotigotine1-0-0	Medtronic, 3389S, RC	STN	monopole	C+		1-							140	60	1.8	1752	C+		9-							140	60	1.5	890
		Zhong Qunfen	2024-04-23	Female	68	PD	12	chekiang	2024-03-22	Slow, stiff, abnormal movement, gait disturbance	Dyskinesia	Yes	No	Level 2	13967951239	2025-03-22	Medoba3/4-3/4-3/4, Kedan1/2-1/2-1/2	Medoba1/4-1/4-1/4	Pingchi.1200-40 Lead；SR1101	STN	monopole	C+		2-							140	60	1.2		C+		6-							140	60	1.6
		Chen Xiaolin	2024-04-23	Male	52	Meige	6months	Fujian	2024-03-28	Difficulty opening eyes, involuntary lip movements, spasm-like	-	No	No	Level 2	13348339468	2025-03-28	No	No	jingyu1200-40 Lead；SR1101	Gpi	monopole	C+	0-								130	60	1.6	1410	C+	4-								130	60	1.5	710
		Wu Peizhen	2024-05-06	Female	64	Tremor	26	Shanghai	2024-04-01	Right limb tremor, more movement than rest, jaw tremor	-	No	No	Level 2	13795305716	2025-04-01	No	No	jingyu1200-40 Lead；SR1101	VIM-PSA	monopole	C+			2-						130	60	2		C+	4-								130	60	1
		Li Yuezi	2024-05-06	Female	71	PD	7	chekiang	2024-04-03	Slow, stiff, end of the dose, hallucinations, cognitive decline	end of the dose, hallucination	Yes	No	Level 2	13357067389	2025-04-03	Medoba1-1-1-1-1, Daringfu1/2-1/2-1/2-1/2-1/2, Prapexor (0.25mg) 2-2-2, amantadine1-0-1, Slaiglan1-0-1	Medoba3/4-3/4-3/4-1/2，Daringfu1/2-0-1/2，amantadine1-0-1，Slaiglan1-0-1，Prapexor（0.25mg）1-1-1	jingyu1200-40 Lead；SR1101	STN	monopole	C+		1-							130	60	1.5		C+			6-						130	60	2
		Pan Zhongyi	2024-05-06	Female	58	Meige	4	chekiang	2024-04-07	Meige	-	No	No	Level 2	13524374404	2025-04-07	diphenhydroxysol 1-0-1, Clonazepam 1-0-1, levodopa (0.5g) 1-0-1	diphenhydroxysol 1-0-1，Clonazepam1-0-1，၆ᠫ୺ၔ（0.5g）1-0-1	jingyu1200-40 Lead；SR1101	Gpi	monopole	C+	0-								130	80	1.5mA		C+	4-								130	80	1.5mA
		Zhang Mingju	2024-05-07	Female	69	PD	11	Shanghai	2024-04-02	Abnormal movement, end of the dose, palpitations, RBD, psychiatric symptoms, leg tremor	Abnormal movement, end of the dose, RBD	Yes	Yes	Level 1	13162476776	2025-04-02	Medoba1-1-1, Teshuda1-1-1, amantadine1-0-1, diphenhydroxysol 1/2-1/2-1/2	Medoba3/4-1/2-3/4，diphenhydroxysol 1/2-0-0，amantadine1/2-0-1/2	Medtronic, 3389S, RC	STN	monopole	C+			2-						130	60	0.8		C+			10-						130	60	1
		Li Yanghong	2024-05-07	Female	67	PD	12	Shanghai	2024-04-03	Tremor, end of the dose, poor gait	Wearing off	Yes	Yes	Level 1	13661779385	2025-04-03	Medoba1/2-1/2-1/2-1/2, Kedan1-0-0-1, Senforo (0.25mg) 1-1-1	Medoba 1/2-1/4-1/2，Kedan1/2-0-1/2，Senforo（0.25mg）0-0-0-1	Medtronic, 3389S, RC	STN	monopole	C+			2-						130	60	1		C+			10-						130	60	1
		Wang Wei	2024-05-07	Female	68	PD	24	Shanghai	2024-04-11	On-off phenomenon, abnormal movement, tremor, difficulty walking, freezing	Abnormal movement, on-off, freezing	Yes	Yes	Level 1	13801882176	2024-04-11	Medoba1/4-1/4-1/4-1/4, Xi Ning1/2-1/2-1/2-1/2, Senforo (0.25mg) 1-1-1, amantadine 1-1-0, Clozapine 1/4-0-1/4, diphenhydroxysol 1-1-1	Medoba1/4-1/4-1/4-1/4，Xi Ning1/2-0-1/2，amantadine1-1-0，Clozapine1/4-0-1/4，diphenhydroxysol 0-1-0	Medtronic, 3389S, RC	STN	monopole	C+		1-							130	60	1.8		C+		9-							130	60	1.5
		Zhao Qiaozhen	2024-05-11	Female	69	PD	5	Jiangsu	2024-04-12	Tremor, slow, stiff, on-off phenomenon, freezing	On-off, freezing	Yes	No	Level 2	15195582588	2025-04-12	Medoba1/2-1/2-1/2-1/2-1/2-1/2-1/2	Medoba1/2-1/2-1/2-1/2	Medtronic, 3389S, RC	STN	monopole	C+		1-							110	60	1.5		C+		9-							110	60	1.5
		Liu Peijin	2024-05-13	Male	61	PD	4	Jiangsu	2024-04-15	Slow, stiff, end of the dose, slightly better right upper limb	Wearing off	Yes	No	Level 2	13606102206	2025-04-15	Medoba1/2-1/2-1/2, Prapexor (0.375mg) 0-0-0-1, amantadine 1-0-1, diphenhydroxysol 1/2-0-0	Medoba1/2-1/2-1/2，Prapexor（0.375mg）0-0-0-1，amantadine1-0-1，diphenhydroxysol 1/2-0-0	Pingchi.1200-40 Lead；SR1101	STN	monopole	C+		2-							130	60	1.5		C+		6-							130	60	1.8
		Lin Jia	2024-05-13	Female	40	PD	7	chekiang	2024-04-16	Abnormal movement, on-off phenomenon, freezing, gait disturbance, muscle tone not high	Abnormal movement, on-off, freezing	Yes	Yes	Level 1	13817051616	2025-04-16	Medoba3/4-3/4-3/4, Xi Ning3/4-3/4-3/4, Teshuda 1-1-1, amantadine 1-1-1, diphenhydroxysol 1/2-1/2-1/2	Medoba1/2-1/2-1/2，Xi Ning1/2-0-1/2，Teshuda0-0-0-1，amantadine1-1-0，diphenhydroxysol 1-0-0	Medtronic, 3389S, RC	STN	monopole	C+			2-						110	60	1.5	1270（1.3mA)	C+			10-						110	60	1.5	1051(1.5mA)
		He Zhida	2024-05-13	Male	68	PD	5	chekiang	2024-04-18	Slow, stiff, on-off phenomenon, left side more severe	On-off	Yes	No	Level 2	15957921613	2025-04-18	Medoba 1-1-1, Kedan 1/2-1/2-1/2	Medoba3/4-3/4-3/4	Medtronic, 3389S, RC	STN	monopole	C+		1-							130	60	1.5	1.1mA	C+		9-							130	60	0.8	1.2mA
		Wang Kehong	2024-05-13	Female	57	PD	8	Henan	2024-04-17	Abnormal movement, stiffness, slow	Dyskinesia	Yes	No	Level 2	18738322903	2025-04-17	Medoba 1-1-1, Xi Ning 0-0-0-1, Prapexor (0.25mg) 1-0-0	Medoba1/2-1/2-1/2，Xi Ning0-0-0-1/2	Pingchi.1200-40 Lead；SR1101	STN	monopole	C+			3-						130	60	1.5	1810	C+			7-						130	80	1.2	1427
		Wang Wei	2024-05-09	Male	48	PD	6	chekiang	2023-09-05	-	-	Yes	Yes	Level 1	13567943092	2025-09-05	No	No	Medtronic, 3389S, RC	STN	monopole	C+		1-							130	80	2.3		C+			10-						130	80	2.5
		Zhang Jumin	2024-05-09	Female	71	PD	14	chekiang	2024-05-11	Left-right labels reversed	Incorrect labeling of left and right sides	Yes	No	Level 2	15067223927	2025-05-11	Medoba1/2-1/2-1/2-1/2	Medoba1/2-1/2-1/2-1/2	Pingchi.1200-40 Lead；SR1101	STN	monopole	C+				4-					130	60	1.85	1526	C+			7-						130	60	1.75	1376
		Gong Haitao	2024-05-11	Male	32	Dystonia	12	Ningxia	2024-04-08	Right-sided torsion, high muscle tone, muscle twitching, spasm	-	No	No	Level 2	18161640003	2025-04-08	No	No	jingyu1200-40 Lead；SR1101	STN	monopole	C+			2-						130	80	1.5mA
		Ping Qihong	2024-05-20	Male	64	PD	6	Jiangsu	2024-04-18	Dyskinesia	Dyskinesia	Yes	Yes	Level 1	18752973227	2025-04-18	Medoba 1-1-1, Teshuda (50mg) 1-1-1	Medoba1/2-1/2-1/2，Teshuda0-0-0-1	Medtronic, 3389S, RC	STN		+			-						130	60	1	1288（0.8mA）	+			-						130	60	1.2	1337（0.9mA）
		Song Guochun	2024-05-20	Male	56	PD	12	Chongqing	2024-04-20	Tremor, slow, stiff, right upper limb tremor	-	Yes	No	Level 2	18723519925	2025-04-20	Medoba 3/4-3/4-3/4-3/4, Senforo (0.25mg) 1-1-1-1	Medoba1/2-1/2-1/2，Senforo1-1-1	jingyu1200-40 Lead；SR1101	STN		+		-							130	60	1.5		+		-							130	60	1
		Zou Shui Tao	2024-05-20	Male	70	PD	10	Jiangsu	2024-04-22	End of the dose, tremor, non-motor end of the dose	Wearing off	Yes	No	Level 2	1590062481	2025-05-22	Medoba 3/4-3/4-3/4, Kedan 1/2-1/2-1/2, Senforo (0.75mg) 1-0-1, Antan 1/2-0-1/2, Almar 1/2-0-1/2, Xi Ning 0-0-0-1	Medoba1/2-1/2-1/2，෩৆1/2-0-0，Xi Ning0-0-0-1/2	Medtronic, 3389S, RC	STN		+		-							130	60	2.2	1443（1.5mA）	+		-							130	60	1.2	820（1.4mA）
		Zhu Gangqing	2024-05-23	Male	65	PD	10	Shanghai	2024-04-26	End of the dose, difficulty walking, freezing, left foot tremor, dizziness	End of dose, freezing	Yes	No	Level 2	13162942752	2025-04-26	Medoba 1/2-1/2-1/2, Xi Ning 1/2-1/2-1/2, Senforo (0.25mg) 1-1-1	Medoba1/2-1/2-1/2，Xi Ning0-0-0-1/2，Senforo（0.25mg）0-0-0-1	Medtronic, 3389S, RC	STN	monopole	C+		1-							130	60	1.2		C+		9-							130	60	1.1
		Zhou Shumei	2024-05-23	Female	58	PD	5	Jiangsu	2024-04-25	Right leg tremor, right hand not nimble, speech soft	-	Yes	Yes	Level 1	18360087775	2025-04-25	Medoba 1/4-1/4-1/4, Daringfu 1-1-1, Resa Gilan 1-0-0, amantadine 1-1-1	Medoba1/4-1/4-1/4，amantadine1-1-0	Medtronic, 3389S, RC	STN		+		-							130	60	1.3	1316（1.0mA）	+		-							130	60	1.1	1912（0.6mA）
		Xie Jianguo	2024-05-23	Male	68	Dystonia	9	Anhui	2024-04-25	Involuntary head and neck movements, backward tilt, significant improvement post-surgery 70%-80%, more than 2 weeks, recent recurrence, chin turns left with difficulty, right upper limb hand tremor, right sternocleidomastoid muscle thickened	-	Yes	No	Level 1	13805626483	2025-04-25	No	No	Pingchi.1200-40 Lead；SR1101	Gpi	monopole	C+		2-							130	80	1.5		C+		6-							130	60	1.5
		Zhu Qingwen	2024-05-27	Female	53	PD	6	Shanghai	2024-04-28	Slow, stiff, end of the dose, fluctuation, abnormal movement induced by left lower limb stimulation	End of dose, fluctuation	Yes	Yes	Level 1	13301659319	2025-04-28	Prapexor (0.375mg) 1-0-1, amantadine 1-1-0, Medoba 1/4-1/4-1/4	amantadine1-1-0，Medoba1/4-0-1/4	Medtronic, 3389S, RC	STN		+			-						130	60	0.8	746（1.1mA)	+			-						130	60	0.8	1322（0.6mA)
		Zhao Ruihua	2024-05-27	Female	75	PD	12	Shandong	2024-04-26	Tremor, slow, stiff	-	Yes	No	Level 2	15376210977	2025-04-26	Medoba 1/4-1/4-1/4	Medoba1/4-1/4-1/4	jingyu1200-40 Lead；SR1101	STN		+		-							130	60	1.1		+		-							130	60	1.3
		Wu Denghua	2024-05-28	Female	65	PD	9	Jiangsu	2024-04-29	Slow, stiff, end of the dose, freezing	End of dose, freezing	Yes	No	Level 2	13407510955	2025-04-29	Daringfu1-0-1, amantadine0-1-0, Vitaminb6 1-1-1, diphenhydroxysol 1-1-1, Medoba3/4-3/4-3/4	Daringfu1/2-0-1/2，amantadine0-1-0，Vitaminb6 1-1-1，diphenhydroxysol 1/2-0-0，Medoba1/2-1/2-1/2	Pingchi.1200-40 Lead；SR1101	STN		+		-							130	60	1	1213	+		-							130	60	1.5	1193
		I have a poor winter	2024-05-28	Female	59	PD	5	chekiang	2024-04-28	Tremor, slow, stiff, end of the dose, on-off phenomenon, drooling	End of dose, on-off phenomenon	Yes	No	Level 2	13357651536	2025-04-28	Medoba1-1/2-1, Xi Ning0-1-0, Vitaminb6 1-1-1	Medoba1/2-1/2-1/2，Xi Ning0-0-1/2	jingyu1200-40 Lead；SR1101	STN		+			-						130	60	1.6		+			-						130	60	2
		Hu Guobao	2024-05-28	Male	61	Meige	8	Hangzhou	2024-04-29	Right sternocleidomastoid muscle hypertrophy	-	No	No	Level 2	18667020035	2025-04-29	No	No	jingyu1200-40 Lead；SR1101	Gpi	monopole	C+		1-							130	120	2.5		C+		5-							130	90	2.5
		Dong Shuizhao	2024-06-03	Female	74	PD	7	Shanghai	2024-05-10	Tremor, stiff, hallucinations, postoperative hallucinations improved, daytime sleepiness	Hallucination	Yes	Yes	Level 1	18916672177	2025-05-10	Medoba3/4-3/4-3/4-3/4-3/4-3/4, Xi Ning1/2-1/2-1/2-1/2-1/2-1/2, Prapexor (0.25mg) 1-1-1-1-1-1, Rothigottin (4mg) qd	Medoba1/2-1/2-1/2-1/2，Xi Ning1/2-0-1/2，Prapexor（0.25mg）1-1-1-1，Rothigottin（2mg） qd	jingyu1200-40 Lead；SR1101	STN	monopole	C+			-						130	60	1.5	1494（1.0mA）	C+			-						130	60	1.5v	958（1.6mA)
		Su Weitian	2024-06-03	Male	65	PD	14	Shanxi	2024-05-08	Tremor, slow, stiff, forward flexion, poor memory, postural disturbance	-	Yes	No	Level 2	13835062087	2025-05-08	Medoba3/4-3/4-3/4, Teshuda1-1-1, amantadine1-0-1	Medoba1/2-1/2-1/2，Teshuda0-0-0-1，amantadine1-0-0，Clonazepam0-0-0-1/4	Medtronic, 3389S, RC	STN	monopole	C+			-						130	60	1.2	1288（0.9mA）	C+			10-						130	60	1.8	1838（1.0mA）
		Cao Zhifan	2024-06-03	Male	60	PD	6	Shanghai	2024-05-06	Abnormal movement, end of the dose	Abnormal movement, end of dose	Yes	Yes	Level 1	18930967109	2025-05-06	Medoba1/2-1/2-1/2-1/2, Prapexor (0.375mg) 1-0-0, amantadine1-0-1, Vitaminb6 1-1-1, Kedan1/2-0-0	Medoba1/2-1/2-1/2，Prapexor（0.375mg）0-0-0-1，amantadine1-0-0	jingyu1200-40 Lead；SR1101	STN	monopole	C+			2-						130	60	1.8		C+			6-						130	60	1.5
		Ni Shiping	2024-06-04	Male	63	PD	7	Jiangsu	2024-05-09	Abnormal movement, end of the dose	Abnormal movement, end of dose	Yes	Yes	Level 1	18962899666	2025-05-09	Medoba3/4-3/4-3/4, Senforo (0.25mg) 3/2-3/2-3/2, midopy1-0-1, Daringfu1/2-1/2-1/2, diphenhydroxysol 1/2-0-1/2, Vitaminb6 1-1-1	Medoba1/2-1/2-1/2	Medtronic, 3389S, RC	STN	monopole	C+		1-							130	60	1.1	1647（0.7mA）	C+		9-							130	60	1.2	1398（0.8mA）
		Wang Bozhong	2024-06-04	Male	58	PD	9	Sichuan	2024-05-09	End of the dose, stiff neck, coughing while drinking	Wearing off	Yes	Yes	Level 1	15244886772	2025-05-09	Medoba3/4-3/4-3/4, Senforo (0.75mg) 1-0-0, Daringfu1/2-0-1/2	Medoba3/4-3/4-3/4-3/4，Senforo（0.75mg）1-0-0，Daringfu1/2-0-1/2	Pingchi.1200-40 Lead；SR1101	STN	monopole	C+		2-							120	60	1.6		C+		6-							120	60	1.8
		Shen Qi'e	2024-06-04	Female	68	PD	12	chekiang	2022-11-14	Intraoperative noon hypoxia, postoperative muscle spasm	-	No	No	No	13645832106	2025-11-14	Medoba1-1-1-1, 开浦兰3-0-3, Senforo (0.25mg) 1-1-1-1, CNZ 1/2-0-1	Medoba1-1-1-1，ᅠῆϐ3-0-3，Senforo（0.25mg）1-1-1-1，CNZ 1/2-0-1	Pingchi.1200-40 Lead；SR1101	STN	monopole	C+		1-							130	70	2.5		C+		9-							130	70	2.6
		Lv Caikang	2024-06-12	Male	65	PD	10	Jiangsu	2023-06-15	Abnormal movement in the right foot, RBD, memory loss	Rapid eye movement sleep behavior disorder (RBD)	Yes	Yes	Level 1	13812019593	2025-06-15	Medoba1/2-1/2-1/2-1/2-1/2, Clozapine1/2-0-1/2	Medoba1/2-1/2-1/2-1/2-1/2，Clozapine1/2-0-1/2	jingyu1200-40 Lead；SR1101	STN	cross	C+		1-							130	60	2.5		C+		5-							130	70	2.8
		Lv Caikang	2024-06-12	Male	65	PD	10	Jiangsu	2023-06-15	Abnormal movement in the right foot, RBD, memory loss	Rapid eye movement sleep behavior disorder (RBD)	Yes	Yes	Level 1	13812019593	2025-06-15	Medoba1/2-1/2-1/2-1/2-1/2, Clozapine1/2-0-1/2	Medoba1/2-1/2-1/2-1/2-1/2，Clozapine1/2-0-1/2	jingyu1200-40 Lead；SR1101	STN	cross	C+			2-						130	70	2.6		C+	4-								130	60	2
		Zhuang Yonglan	2024-06-12	Female	69	PD	11	Jiangsu	2023-06-02	-	-	Yes	No	Level 2	15366515071	2025-06-02	No	No	jingyu1200-40 Lead；SR1101	STN	monopole	C+			2-						130	70	2.6		C+				7-					160	80	3.3
		Li Huishu	2024-06-17	Female	58	PD	12	chekiang	2024-05-10	Tremor, stiff, abnormal movement, fluctuation, freezing	Abnormal movement, fluctuation, freezing	Yes	No	Level 2	18957041361	2025-05-10	Xi Ning1/2-1/2-1/2-1/2, amantadine1-0-1, Senforo (0.25mg) 1-0-1	compoundׁḴ୺ၔ1/2-1/2-1/2	Pingchi.1200-40 Lead；SR1101	STN	monopole	C+				4-					125	60	1.8	1337	C+				8-					125	70	2.1	959
		Ye Jianxin	2024-06-18	Male	59	PD	11	chekiang	2024-05-10	Freezing, end of the dose, abnormal movement, postural balance disorder	Freezing, end of dose, abnormal movement	Yes	No	Level 2	13566726858	2025-05-10	Medoba1/4-1/4-1/4-1/4, Xi Ning1/2-1/2-1/2-1/2, Resa Gilan1-0-0	Medoba1/4-1/4-1/4，Xi Ning2-2-2	Pingchi.1200-40 Lead；SR1101	STN	cross	C+			3-						130	60	1	1171	C+			7-						130	60	1964
		Ye Jianxin	2024-06-18	Male	59	PD	11	chekiang	2024-05-10	Freezing, end of the dose, abnormal movement, postural balance disorder	Freezing, end of dose, abnormal movement	Yes	No	Level 2	13566726858	2025-05-10	Medoba1/4-1/4-1/4-1/4, Xi Ning1/2-1/2-1/2-1/2, Resa Gilan1-0-0	Medoba1/4-1/4-1/4，Xi Ning2-2-2	Pingchi.1200-40 Lead；SR1101	STN	cross	C+				4-					130	60	2	1142	C+				8-					130	60	1410
		Pan Shuhua	2024-06-19	Female	59	PD	5	Jiangsu	2023-06-20	-	-	Yes	Yes	Level 1	13505119016	2025-06-20	Medoba1/2-1/2-1/2, Teshuda1/2-0-1/2, diphenhydroxysol 1/2-0-1/2	Medoba1/2-1/2-1/2，Teshuda1/2-0-1/2，diphenhydroxysol 1/2-0-1/2	Medtronic, 3389S, RC	STN	cross	C+		1-							125	60	2	1500（1.3mA）	C+		9-							125	60	2.1	1503（1.4mA）
		Pan Shuhua	2024-06-19	Female	59	PD	5	Jiangsu	2023-06-20	-	-	Yes	Yes	Level 1	13505119016	2025-06-20	Medoba1/2-1/2-1/2, Teshuda1/2-0-1/2, diphenhydroxysol 1/2-0-1/2	Medoba1/2-1/2-1/2，Teshuda1/2-0-1/2，diphenhydroxysol 1/2-0-1/2	Medtronic, 3389S, RC	STN	cross														C+			10-						125	60	1.2	1912（0.6mA）
		Zhang Jianfen	2024-06-24	Female	69	PD	5	chekiang	2024-05-14	Reverse end of the dose, mild abnormal movement	End-of-dose dyskinesia	Yes	No	Level 2	13586727188	2025-05-14	Silem1/4-1/4-1/4, Xi Ning0-0-0-1, Daringfu1/2-1/2-1/2	Silem1/4-1/4-1/4，Xi Ning0-0-0-1，Daringfu1/2-1/2-1/2	Medtronic, 3389S, RC	STN	monopole	C+		1-							130	60	1.5		C+		9-							130	60	1.6
		Lu Liping	2024-06-24	Female	71	PD	19	Jiangsu	2024-05-17	End-of-dose, dyskinesia	End-of-dose dyskinesia	Yes	No	Level 2	18112123363	2025-05-17	Medoba1/4-0-1/4, Silem1/4-0-1/4, Teshuda1-0-1, Resa Gilan1-0-0	No	Pingchi.1200-40 Lead；SR1101	STN	monopole	C+				4-					120	60	0.8		C+				8-					120	60	0.9
		Song Juan	2024-06-25	Female	46	PD	8	Hubei	2024-05-16	Abnormal movement, end of the dose	Abnormal movement, end of dose	Yes	Yes	Level 1	18986501223	2025-05-16	Medoba1/4-1/4-1/4, Xi Ning1/2-1/2-1/2, Anke Jing1-1-1, Vitaminb6 1-1-1, amantadine1-1-1	Medoba1/4-1/4-1/4，Xi Ning1/2-1/2-1/2，෩ُ⠩1-1-1，Vitaminb6 1-1-1，amantadine1-1-1	Medtronic, 3389S, RC	STN	monopole	C+		1-							130	60	1.3		C+		9-							130	70	1.6
		Zhang Bingsheng	2024-06-25	Male	64	PD	6	chekiang	2024-05-14	Wearing off	Wearing off	Yes	No	Level 2	13757061607	2025-05-14	Medoba3/4-1/2-1/2-3/4-1/2, Kedan1-1-1/2-1/2, amantadine1-1-0, Vitaminb6 1/2-1/2-1/2-1/2-1/2	Medoba1/2-1/2-1/2	Medtronic, 3389S, RC	STN	monopole	C+		1-							130	60	1.4v	1071（1.3mA）	C+		9-							130	60	1.6	861（1.8mA)
		Wang Gangling	2024-06-26	Male	71	PD	18	Shanghai	2024-05-16	Abnormal movement, end of the dose	Abnormal movement, end of dose	Yes	Yes	Level 1	13023298102	2025-05-16	Medoba1/2-1/2-1/2, Xi Ning1/2-1/2-1/2, Prapexor (0.25mg)1-1-1	Medoba1/2-1/2-1/2，Xi Ning1/2-1/2-1/2，Prapexor（0.25mg）1-1-1	Pingchi.1200-40 Lead；SR1101	STN	monopole	C+			3-						140	60	1.3	1059	C+			7-						140	70	2	1486
		Ban Jianxia	2024-07-01	Female	49	PD	8	Shanghai	2024-05-20	Bilateral abnormal movement, difficulty starting, left side more pronounced	Dyskinesia	Yes	Yes	Level 1	18616747688	2025-05-20	Senforo (0.25mg)1-0-0, Daringfu2/3-0-0, diphenhydroxysol 1-0-0	No	Pingchi.1200-40 Lead；SR1101	STN		+		-							130	60	1		+		-							130	70	0.8
		Ang lee	2024-07-01	Female	57	MSA	6	Shanghai	2024-05-20	Tremor, slow, stiff, dyskinesia	Multiple system atrophy (MSA)	Yes	No	Level 2	13818680252	2025-05-20	Medoba1/2-1/2-1/2, Xi Ning1/4-1/4-1/4, Slaiglan1-0-1, Senforo (0.25mg)2-2-2, amantadine1-1-0, diphenhydroxysol 1/2-1/2-1/2	Medoba 1/2tabletstid	Medtronic，3389S，PC	STN		+		-							140	60	2.0MA		+		-							140	60	0.6mA
		Liao Jinliang	2024-07-02	Male	60	PD	8	Jiangxi	2024-05-21	Freezing, on-off phenomenon	Freezing, on-off phenomenon	Yes	No	Level 2	17891530562	2025-05-21	Slaiglan1-0-0, Senforo(0.25mg)1-1-1, Daringfu1-1-1-1		Pingchi.1200-40 Lead；SR1101	STN		+		-							160	60	2.0mA		+		-							160	70	2.0mA
		Zhu Laxiu	2024-07-03	Female	74	PD	12	Jiangsu	2023-07-04	Tension not high	-	Yes	No	Level 2	13501859902	2025-07-04	Medoba1/4-1/4-1/4	Medoba1/4-1/4-1/4	Medtronic，3389S，PC	STN		+		-							105	70	2.3	1272（1.8mA)	+			-						105	70	2.5	1095（2.3mA)
		Zhou Yaping	2024-07-03	Female	61	PD	13	chekiang	2024-05-23	Slow, stiff, on-off phenomenon, abnormal movement	On-off phenomenon, dyskinesia	Yes	Yes	Level 1	13967887072	2025-05-23	Medoba3/4-3/4-3/4, Xi Ning1/2-1/2-1/2, Senforo (0.25mg)1-1-1, Resa Gilan1-0-0, amantadine0-1-0, Clozapine (25mg)0-0-1		jingyu1200-40 Lead；SR1101	STN		+		1-							130	60	1.5		+		-							130	60	1.5
		Wang Dongyun	2024-07-03	Female	58	Meige	1.5	Jiangsu	2024-05-23	Eyelid spasm, difficulty opening eyes	-	No	No	Level 2	15862774516	2025-05-23	Tipride1-0-1, Baclofen1-0-1, Clonazepam0-0-0-1/2, diphenhydroxysol 1-0-1	Tipride1-0-1，Baclofen1-0-1，Clonazepam0-0-0-1/2，diphenhydroxysol 1-0-1	jingyu1200-40 Lead；SR1101	Gpi		+	-								130	60	1.5		+	-								130	60	1.5
		Ye Weiying	2024-07-09	Female	48	PD	9	chekiang	2024-05-27	Tremor, slow, stiff, poor sleep, fluctuation	Fluctuation	No	No	Level 2	15990483809	2025-05-27	Medoba1/2-1/2-1/2-1/2, Senforo (0.25mg) 1-1-1, amantadine1-1-0	Medopa1/4tabletstid	jingyu1200-40 Lead；SR1101	STN		+			-						160	60	1		+			-						170	60	1.1
		Ye Weiying	2024-07-09	Female	48	PD	9	chekiang	2024-05-27	Tremor, slow, stiff, poor sleep, fluctuation	Fluctuation	No	No	Level 2	15990483809	2025-05-27	Medoba1/2-1/2-1/2-1/2, Senforo (0.25mg) 1-1-1, amantadine1-1-0	Medopa1/4tabletstid	jingyu1200-40 Lead；SR1101	STN		+				-					160	60	1.3		+				-					170	60	1.3
		Tao Chunsheng	2024-07-09	Male	68	PD	15	Jiangsu	2024-05-22	Tremor, slow, stiff	-	Yes	Yes	Level 1	13761781012	2025-05-22	Medoba1/4-1/2-1/4, Xi Ning1/2-0-1/2, Teshuda1-0-1, amantadine1-1-1, Vitaminb6 1-1-1, diphenhydroxysol 1-0-1	Medopa1/4tabletstid	Pingchi.1200-40 Lead；SR1101	STN		+		-							130	60	1.4	1063	+			-						130	60	1.6	1717
		Shi Huajiang	2024-07-10	Male	43	PD	6	chekiang	2024-05-29	Tremor, slow, stiff, dyskinesia	Dyskinesia	No	No	Level 2	15824167397	2025-05-29	Medoba3/4-3/4-3/4-3/4, Kedan1-1-1-1, Daringfu0-0-0-1	Medoba 1/4tabletstid	Medtronic, 3389S, RC	STN		+			-						130	60	1.4		+			-						130	60	2.1
		Yang Bin's brain sense	2024-07-10	Male	56	PD	5	Jiangsu	2024-05-28	Tremor, slow, stiff, Abnormal movement, fluctuation	Brain sense	Yes	Yes	Level 1	13851267915	2025-05-28	Medoba1/2-1/2-1/2-1/2, Resa Gilan1-0-0, Xi Ning1/2-1/2-1/2	Medopa 1/4tabletstid	Medtronic, 3389S, RC	STN		+				-					130	60	1.3mA		+				-					130	60	0.9mA
		He Qiuyuan	2024-07-11	Female	68	PD	10	Jiangsu	2024-05-28	Wearing off	Wearing off	Yes	Yes	Level 1	15990158903	2025-05-28	Medoba1/2-1/2-1/2, Xi Ning1/2-1/2-1/2, Kedan1/2-0-1/2, Teshuda1-1-1, Slaiglan1-0-1	Medoba1/2-1/2-1/2	Pingchi.1200-40 Lead；SR1101	STN		+			-						130	60	1.4	1721	+			-						130	60	1	1575
		Lind Saifen	2024-07-11	Female	67	PD	12	chekiang	2024-05-31	Slow, stiff	Slow, stiff	Yes	No	Level 2	18906661902	2025-05-31	Medoba1-3/4-3/4, Prapexor (0.25mg) 2-2-2, amantadine1-1-0	Medoba 1/2tabletstid	Pingchi.1200-40 Lead；SR1101	STN		+		-							130	60	1.6	1162	+		-							130	60	2.2	1105
		Jiang Jianying	2024-07-04	Female	68	PD	6	Jiangsu	2024-05-24	Slow, stiff, on-off phenomenon, Abnormal movement	On-off, dyskinesia	Yes	No	Level 2	13815992003	2025-05-24	Medoba1/2-1/2-1/2-1/2-1/2-1/2, Teshuda1-1-1		Pingchi.1200-40 Lead；SR1101	STN		+			-						120	60	1.2	898	+				-					120	60	1.1	1215
		Yue Huijuan	2024-07-10	Female	59	SCA12	7	Jiangsu	2022-11-08	24.6 Unsteady walking, increased tremor, unable to play Mahjong	Gene	No	No	Level 1	13812752331	2025-11-08	No	No	jingyu1200-40 Lead；SR1101	VIM-PSA		+			-						185	80	4		+				-					165	70	3.4
		Yue Huijuan	2024-07-10	Female	59	SCA12	7	Jiangsu	2022-11-08	24.6 Unsteady walking, increased tremor, unable to play Mahjong	Gene	No	No	Level 1	13812752331	2025-11-08	No	No	jingyu1200-40 Lead；SR1101	VIM-PSA		+				-					185	80	3.5
		and Liberty	2024-07-16	Male	53	Dystonia	6months	Yunnan	2024-06-03	Ptosis, torticollis, right side more severe	-	No	No	Level 3	18724813785	2025-06-03	Clonazepam (2mg) 1-0-1, diphenhydroxysol (2mg) 1-1-1, mecobalamin (0.5mg) 1-1-1, Nemo Horizon (30mg) 1-1-1	Clonazepam（2mg）1-0-1，diphenhydroxysol （2mg）1-1-1，（0.5mg）1-1-1，Nemo Horizon（30mg）1-1-1	Pingchi.1200-40 Lead；SR1101	STN		+				-					130	60	1.8	1367	+				-					130	60	1.5	1222
		Zhao is Ying	2024-07-16	Female	70	PD	9	Shanghai	2024-06-05	Slow, stiff, end of dose, Abnormal movement in both hands	End-of-dose, dyskinesia	Yes	Yes	Level 1	15901706961	2025-06-05	Medoba1/2-0-0, Senforo (0.25mg) 0-0-1, amantadine1/2-0-1/2	Medoba1/4-1/4-1/4，Vitaminb61-1-1	Medtronic, 3389S, RC	STN		+				-					120	60	0.9	1826（0.5mA）	+				-					120	60	1.2	1646（0.7mA）
		Gu Nini	2024-07-16	Female	57	PD	8	chekiang	2024-06-05	Slow, stiff, left side more severe, left upper and lower limbs resting tremor (more severe in lower limbs), Abnormal movement, difficulty turning over	Dyskinesia	No	No	Level 3	13065558108	2025-06-05	Medoba1/2-1/2-1/2, Resa Gilan1-0-0, Ntakapong1/2-1/2-1/2, Senforo (0.25mg) 1-1-1, amantadine1-1-0 (1), Xi Ning0-0-0-1/2, Vitaminb6 1-0-0	Medoba1/2-1/2-1/2	Pingchi.1200-40 Lead；SR1101	STN		+		-							150	60	1	1691	+		-							150	60	1.5	1353
		Square Enix	2024-07-17	Female	72	PD	7	Anhui	2024-06-06	Tremor, slow, stiff, preoperative Abnormal movement	-	Yes	Yes	Level 1	13665516328	2025-06-06	Medoba1-1-1, amantadine1-1-0, Teshuda1-1-1, Kedan1/2-0-0, Vitaminb6 1-1-1	Medoba1/2-1/2-1/2，Teshuda1-0-1	Medtronic, 3389S, RC	STN		+				-					170	70	2.3	1126（2.0mA）	+			-						170	80	2	900（2.1mA）
		Meng Huachun	2024-07-17	Male	73	PD	10	chekiang	2024-06-04	Slow, stiff, freezing	Freezing	Yes	No	Level 2	13958160118	2025-06-04	Medoba3/4-3/4-3/4-3/4, Senforo（0.25mg）1-1-1-1, Daringfu1-1/2-1	Medoba1/2-1/2-1/2	Pingchi.1200-40 Lead；SR1101	STN		+			-						130	60	2.0mA		+		-							130	70	2.0mA
		Du Development	2024-07-17	Male	73	PD	17	Jiangsu	2023-07-27	Slow, stiff, freezing, Abnormal movement, more severe on the right	Freezing, dyskinesia	Yes	Yes	Level 1	15861701463	2025-07-27	Medoba1/4-1/4-1/4	Medoba1/4-1/4-1/4	jingyu1200-40 Lead；SR1101	STN	邬	+		-							130	60	2.5	1.10KΩ	+		-							135	60	2.8	1.34KΩ
		Du Development	2024-07-17	Male	73	PD	17	Jiangsu	2023-07-27	Slow, stiff, freezing, Abnormal movement, more severe on the right	Freezing, dyskinesia	Yes	Yes	Level 1	15861701463	2025-07-27	Medoba1/4-1/4-1/4	Medoba1/4-1/4-1/4	jingyu1200-40 Lead；SR1101	STN	邬	+			-						130	70	3.1	1.50KΩ
		Du Development	2024-07-17	Male	73	PD	17	Jiangsu	2023-07-27	Slow, stiff, freezing, Abnormal movement, more severe on the right	Freezing, dyskinesia	Yes	Yes	Level 1	15861701463	2025-07-27	Medoba1/4-1/4-1/4	Medoba1/4-1/4-1/4	jingyu1200-40 Lead；SR1101	STN	刘	+	-								130	80	2.5	1.15KΩ	+		-							130	60	3	1.33KΩ
		Du Development	2024-07-17	Male	73	PD	17	Jiangsu	2023-07-27	Slow, stiff, freezing, Abnormal movement, more severe on the right	Freezing, dyskinesia	Yes	Yes	Level 1	15861701463	2025-07-27	Medoba1/4-1/4-1/4	Medoba1/4-1/4-1/4	jingyu1200-40 Lead；SR1101	STN	刘	+			-						130	80	3.2	1.50KΩ
		Let him add a green color	2024-07-22	Female	64	PD	10	Jiangsu	2024-06-14	End of dose, freezing, slow, stiff, truncal Abnormal movement	end of the dose, freezing, Abnormal movement	Yes	No	Level 2	13732690575	2025-06-14	Medoba1/2-1/2-1/2-1/2-1/2, Xi Ning1-0-1, Daringfu1/2-1/2-1/2, Prapexor（0.25mg）1-1-1, Slaiglan1-0-0	Medoba1/2-1/2-1/2	Medtronic, 3389S, RC	STN		+		-							130	60	1.7	1488	+				-					130	60	1.5	1214
		Li Desheng	2024-07-23	Male	45	PD	6	Xinjiang	2024-06-13	Slow, stiff, end of dose, Abnormal movement	End-of-dose, dyskinesia	Yes	Yes	Level 1	15909020221	2025-06-13	Medoba3/4-3/4-3/4-3/4-3/4, Xi Ning1/2-1/2-1/2-1/2-1/2, Kedan0-1-0-1-0, amantadine1-0-0, Prapexor（0.25mg）2-0-2-0-2	Medoba3/4-3/4-3/4	Medtronic, 3389S, RC	STN		+		-							130	60	1.2	1750	+		-							130	60	1.3	1308
		Qiu Juhong	2024-07-23	Female	61	PD	15	Jiangsu	2024-06-14	Tremor, slow, stiff, freezing, Abnormal movement	Freezing, dyskinesia	Yes	Yes	Level 1	13732659015	2025-06-14	Medoba3/4-3/4-3/4, Xi Ning1/2-1/2-1/2, Teshuda1-1-1, diphenhydroxysol 1-1-1, amantadine3/2-3/2-1, Clozapine1/2-1/2-1/2, Vitaminb6 1-1-1	Medoba1/2-1/2-1/2	jingyu1200-40 Lead；SR1101	STN+SNR		+		-							130	60	1.5	1.64KΩ	+		-							130	60	1.4	1.66KΩ
		Zhang Yufeng	2024-07-24	Female	69	PD	15	Shanghai	2024-06-17	Slow, stiff, on-off phenomenon, Abnormal movement, difficulty turning over, freezing	Switching, Abnormal movement, freezing	Yes	No	Level 2	13918045799	2025-06-17	Medoba1-1-1, Slaiglan1-1-1	Medoba1/2-1/2-1/2	Medtronic, 3389S, RC	STN	monopole	C+			2-						130	60	1.4mA	1301	C+				11-					130	60	1.4mA	1119
		Luo Bo	2024-07-24	Female	58	Dystonia	3	Jiangsu	2023-07-04	Trunk leaning forward, abnormal posture, left lower limb weakness	Gene	Yes	No	Level 2	18914902809	2025-07-04	Clonazepam1/4-0-0	Clonazepam1/4-0-0	jingyu1200-40 Lead；SR1101	Gpi	monopole	C+	-								150	90	2		C+	4-								150	100	2
		Yang Guiying	2024-07-25	Female	62	PD	9	Heilongjiang	2024-06-14	Tremor, slow, stiff, on-off phenomenon	On-off	Yes	No	Level 2	15846668889	2025-06-14	Medoba3/4-3/4-3/4-3/4, Senforo（1mg）1/2-1/2-1/2, midopy1/2-1/2-0	Medoba1/2-1/2-1/2-1/2	Medtronic, 3389S, RC	STN	monopole	C+		1-							150	60	1.5	1218（1.2mA)	C+		9-							150	70	2.2	849(2.5mA)
		Cai Haojun	2024-07-22	Male	53	Dystonia	3	Shanghai	2024.7.2	Dystonia	Muscle tone disorder	Yes	No	Level 2	13052270808	2025-07-02	Medoba1/2 bid, Baclofen 10mg tid, Aripiprazole 1/2 tablets Before bedtime	Aripiprazole1/2tabletsqNslowly add to1/2tabletsmorning1tabletsBefore bedtime，Clonazepam 4mg qN，Baclofen1tabletstid	Pinchi，G102RZ	GPi	monopole	C+	-								130	90	2.2V	946	C+	-								130	90	2.0V	1649
		Xie Guofan	2024.7.22	Male	27	TS	10	Liaoning	2024.7.13	Tics, self-injury, coprolalia, abnormal behavior	Tic disorder	No	No	Level 1	13366664598	2025-07-13	Haloperidol1/2 tablets bid, diphenhydroxysol 1/2 tablets bid, Tipride 2 tablets bid, mirtazapine1/4 tablets Before bedtime	Haloperidol 1/4tabletsbid，diphenhydroxysol 1/2tabletsbid，mirtazapine1/4tabletsqN，Aripiprazole1/2tabletsqN，ُ°෺1/4tabletsBefore bedtime，㑭ᥒ᧷1tabletsqd	Medtronic（Lead + Left Chest Stimulator), (Pinchi Right Chest Stimulator)	Bilateralcmpf	monopole	C+			-						130	60	1.0v	1816	C+		-							130	60	1.0v	804	Right subclavian Pinchi, control BilateralGpi, left subclavian Medtronic, control Bilateralcmpf
		Xie Guofan	2024.7.22	Male	27	TS	10	Liaoning	2024.7.13	Tics, self-injury, coprolalia, abnormal behavior	Tic disorder	No	No	Level 1	13366664598	2025-07-13	Haloperidol 1/2 tablet twice daily, diphenhydroxysol 1/2 tablet twice daily, Tipride 2 tablets three times daily, mirtazapine 1/4 tablet before bedtime	Haloperidol 1/4tabletsbid，diphenhydroxysol 1/2tabletsbid，mirtazapine1/4tabletsqN，Aripiprazole1/2tabletsqN，ُ°෺1/4tabletsBefore bedtime，㑭ᥒ᧷1tabletsqd	Medtronic（Lead + Left Chest Stimulator), (Pinchi Right Chest Stimulator)	BilateralGPi	monopole	C+	-								130	90	1.2mA		C+	-								130	90	1.2
		Wang Rishun	2024-07-29	Male	74	PD	11	chekiang	2024-06-21	Slow, stiff, soft voice, freezing	Freezing	Yes	No	Level 2	13566434097	2025-06-21	Medoba 1/4-1/4-1/4-1/4, Daringfu 1-1-1-1, Senforo (0.25mg) 1-1-1, Slaiglan 1-1-0	Medoba1/2-1/2-1/2	Medtronic, 3389S, RC	STN		+		-							130	60	0.8mA	1629	+		-							130	60	0.9mA	1543
		Gu Kangming	2024-07-30	Male	71	PD	16	chekiang	2024-06-18	Tremor, slow, stiff, on-off phenomenon, freezing (more severe on the right), difficulty speaking, slow and stiff on the right side after the medication, hand trembling	Switching, freezing	Yes	No	Level 2	13566508383	2025-06-18	Medoba 1-1-1-1-1, Prapexor (0.25mg) 2-2-2, amantadine 1-0-0	Medoba3/4-3/4-3/4，diphenhydroxysol 1/2-0-0	Pingchi.1200-40 Lead；SR1101	STN	monopole	C+			3-						115	70	1.8v		C+			7-						115	70	1.5v
		Li was satisfied	2024-07-30	Male	43	PD	10	Anhui	2024-06-21	Right hand tremor, gait freezing, weakness in both hands, slow, stiff	Freezing	No	No	Level 3	13965952727	2025-06-21	Medoba 3/4-3/4-3/4-3/4, Teshuda 0-1-0, amantadine 1-0-1, Vitamin B6 1-1-1	Medoba1/2-1/2-1/2，Vitaminb6 1-1-1，diphenhydroxysol Prepare for improvement in tremor	jingyu1200-40 Lead；SR1101	STN	monopole	C+		1-							180	60	1.2v	1.57KΩ	C+		5-							105	60	1.0v	1.48KΩ
		Cui Huaizhen	2024-07-31	Female	65	PD	5	Jiangsu	2023-07-07	Trembling (left lower limb), slow movement in left limb, stiffness, abnormal limb movement, gait freezing, short drug effect, headache, recent whole-body numbness, difficulty urinating	Cognition, functional imaging	Yes	Yes	Level 1	13921924081	2025-07-07	Xi Ning 3/4-3/4-3/4-3/4 (added 1/4 by self)	Medoba1/4-1/4-1/4-1/4，Xi Ning1/2-1/2-1/2-1/2，Vitaminb6 1-1-1	jingyu1200-40 Lead；SR1101	STN		+			-						115	60	1.7v	1.37KΩ	+				-					95	60	2.25	1.16KΩ
		Summer dense forest	2024-07-31	Male	69	PD	12	Inner Mongolia	2024-06-28	Weakness, fluctuation, freezing	Fluctuation, freezing	Yes	No	Level 2	15849031678	2025-06-28	Medoba 3/4-3/4-3/4, Xi Ning 1-1-1, Teshuda 1-0-1, Vitamin B6 1-1-1, Exelon (3mg) 1-0-1	Medoba3/4-3/4-3/4，Vitaminb6 1-1-1	Pingchi.1200-40 Lead；SR1101	STN		+			-						130	60	1.45	1009	+				-					130	60	1.6v	928
		Hu Fengxian	2024-08-01	Female	66	PD	8	Shanxi	2024-06-20	Trembling, slow, stiff, on-off phenomenon, abnormal movement, freezing	Switching, Abnormal movement, freezing	Yes	Yes	Level 1	13097568620	2025-06-20	Medoba 1/4-1/4-1/4-1/4, Xi Ning 1/2-1/2-0-1/2, Vitamin B6 1-1-1-1, Senforo (0.25mg) 0-1/2-0-1/2, Slaiglan 1-0-0, Clozapine 0-0-0-1/2, amantadine 1-0-0	Medoba1/2-1/2-1/2-1/2，Slaiglan1-0-0	jingyu1200-40 Lead；SR1101	STN	monopole	C+			2-						130	60	1.3		C+		5-							125	60	1.25
		Jiang Changrui	2024-08-06	Male	42	PD	6	chekiang	2024-06-24	Trembling, on-off phenomenon, abnormal movement	On-off, dyskinesia	Yes	No	Level 2	15967235687	2025-06-24	Daringfu 1-1-1, Medoba 1/2-1/2-1/2	Medoba1/2-1/2-1/2	jingyu1200-40 Lead；SR1101	STN	monopole	C+		1-							160	60	1.2		C+			6-						130	60	1
		Shi Yingjiang	2024-08-06	Female	65	PD	14	Hunan	2024-06-27	Trembling, slow, stiff, freezing, on-off phenomenon, abnormal movement	Freezing, switching, Abnormal movement	Yes	Yes	Level 1	19807483492	2025-06-27	Medoba 1/4-1/4-1/4-1/4, Xi Ning 1/2-1/2-1/2-0, Senforo (0.25mg) 1-1-1-0, Resa Gilan 1-0-0, amantadine 3/4-3/4-1/2-0, Prapexor (0.25mg) 1-1-1-0	Medoba1/2-1/2-1/2-1/2，Prapexor（0.25mg）1-1-1，Resa Gilan1-0-0，amantadine1/2-1/2-1/2	Medtronic, 3389S, RC	STN	cross	C+				3-					125	60	1.9v	1468（1.3mA)	C+				11-					125	60	2.0v	624（3.1mA)
		Shi Yingjiang	2024-08-06	Female	65	PD	14	Hunan	2024-06-27	Trembling, slow, stiff, freezing, on-off phenomenon, abnormal movement	Freezing, switching, Abnormal movement	Yes	Yes	Level 1	19807483492	2025-06-27	Medoba 1/4-1/4-1/4-1/4, Xi Ning 1/2-1/2-1/2-0, Senforo (0.25mg) 1-1-1-0, Resa Gilan 1-0-0, amantadine 3/4-3/4-1/2-0, Prapexor (0.25mg) 1-1-1-0	Medoba1/2-1/2-1/2-1/2，Prapexor（0.25mg）1-1-1，Resa Gilan1-0-0，amantadine1/2-1/2-1/2	Medtronic, 3389S, RC	STN	cross	C+		1-							125	60	1.2v	1713（0.7mA)	C+		9-							125	60	1.2v	759（1.5mA)
		Yan Jiuxiang	2024-08-07	Female	56	Meige	3	Jiangxi	2024-07-01	Frequent difficulty in opening eyelids, abnormal movement	Dyskinesia	No	No	Level 3	15180051126	2025-07-01	No	No	Medtronic, 3389S, RC	STN					+	-					130	60	1.0v	1145				+	-					130	60	1.0v	2235
		Liu Guiqin	2024-08-07	Female	59	Meige	3	chekiang	2024-06-26	Blinking, difficulty opening eyes	-	No	No	Level 3	15155301638	2025-06-26	No	No	Pingchi.1200-40 Lead；SR1101	STN		+			-						130	60	1.6	928	+			-						130	60	1.55	1437
		Shen Caiyue	2024-08-08	Male	73	PD	12	chekiang	2024-07-01	Slow, stiff, freezing, delayed on period	-	Yes	No	Level 2	13858110185	2025-07-01	Medoba 1/2-1/2-1/2, Senforo (0.25mg) 2-2-2	Medoba1/2-1/2-1/2	Pingchi.1200-40 Lead；SR1101	STN		+		-							130	60	1.5v	1810	+		-							130	60	1.55	1746
		Shen Caiyue	2024-08-08	Male	73	PD	12	chekiang	2024-07-01	Slow, stiff, freezing, delayed on period	-	Yes	No	Level 2	13858110185	2025-07-01	Medoba 1/2-1/2-1/2, Senforo (0.25mg) 2-2-2	Medoba1/2-1/2-1/2	Pingchi.1200-40 Lead；SR1101	STN		+			-						130	60	1.5v	1824	+			-						130	60	1.4	1890
		Chen Lei	2024-07-29	Male	52	PD	10	chekiang	2024-01-25	Left side weakness, abnormal movement	-	Yes	No	四级	13968865879	-	Xi Ning 1/2-1/2-1/2-1/2, Senforo (0.25mg) 1-1-1, Clonazepam 0-0-0-1/3, Venlafaxine (0.75mg) 1-0-0, Medoba occasionally as needed	Senforo（0.25mg）1-1-1，Clonazepam0-0-0-1/3，៧ᔩἵ䇻（0.75mg）1-0-0，Medoba 1/2-1/4-1/2-1/4	Pingchi.1200-40 Lead；SR1101	STN		+			3-						140	70	3.2v		+				8-					140	60	2.6v
		Chen Lei	2024-07-29	Male	52	PD	10	chekiang	2024-01-25	Left side weakness, abnormal movement	-	Yes	No	四级	13968865879	-	Xi Ning 1/2-1/2-1/2-1/2, Senforo (0.25mg) 1-1-1, Clonazepam 0-0-0-1/3, Venlafaxine (0.75mg) 1-0-0, Medoba occasionally as needed	Senforo（0.25mg）1-1-1，Clonazepam0-0-0-1/3，0.75mg）1-0-0，Medoba 1/2-1/4-1/2-1/4	Pingchi.1200-40 Lead；SR1101	STN																5+		7-						140	60	1.7v
		Zhang Rongzhen	2024-08-07	Female	71	PD	8	Shanghai	2021-03-23	-	-	No	No	Level 3	18117300750	-	No	No	Medtronic, 3389S, RC	STN		C+				-					115	70	3.75	956（3.8mA）	C+				-					115	70	3.45	1092（3.1mA）
		Zhang Rongzhen	2024-08-07	Female	71	PD	8	Shanghai	2021-03-23	-	-	No	No	Level 3	18117300750	-	No	No	Medtronic, 3389S, RC	STN				-							115	60	2	549（3.5mA）	C+		-							115	60	3.05	966（3.1mA）
		Ouyang Jun	2024-08-12	Male	44	PD	6	Jiangsu	2024-07-02	Slow, stiff, on-off phenomenon, slight abnormal movement in lower limbs	brainsense, gene, Gpi	Yes	Yes	Level 1	13092019918	2025-07-02	Medoba 1/2-1/2-1/2, Xi Ning 1/2-1/2-1/2, Senforo (0.25mg) 2-2-2, Resa Gilan 1-0-0, amantadine 1-1-1, diphenhydroxysol 1/2-1/2-1/2, Clozapine 0-1-2, Rivalatine Ting (3mg) 0-1-0, Zopiclone (1.5mg) 0-0-0-1, Clonazepam (2mg) 0-0-0-1/2	Medopa 1/2-1/2-1/2, Xining 1/2-1/2-1/2, Senforol (0.25mg) 2-2-2, Rasagiline 1-0-0, Clozapine 0-1-2, Rivastigline (3mg) 0-1-0, Zopenclone (1.5mg) 0-0-0-1, Clonazepam (2mg) 0-0-0-1/2, Discontinue King Kong and Diphenhexol, Clozapine is temporarily retained, and after 2 weeks there is no special discomfort	Medtronic, 3389S, RC	GPi		+		-							130	60	1.3mA		+		-							130	60	1.8mA
		The pipeline is clear	2024-08-13	Male	68	PD	12	chekiang	2024-07-02	Tremor	-	Yes	Yes	Level 1	13616862998	2025-07-02	Medoba 1-1-1-1, Ntakapong 1/3-1/3-1/3-1/3, Xi Ning 0-0-1/2, Prapexor (0.25mg) 1-0-1	Medopa 3/4 tablet TID, Xining 0-0-1/2, Pramipexole (0.25mg) 1-0-1, Rivastigmine 1.5mg qd, and then increase to 3mg bid	Medtronic, 3389S, RC	STN		+		-							145	60	1.3	1745	+		-							145	70	1.6	1575	自觉认知下降 after surgery
		You Changhua	2024-08-13	Male	73	PD	30	Shanghai	2024-07-04	Trembling, freezing, abnormal movement	-	Yes	Yes	Level 1	18321305107	2025-07-04	Medoba 1/2-1/2-1/2-1/2, diphenhydroxysol 1-0-1	Medoba1/2-1/2-1/2	jingyu1200-40 Lead；SR1101	STN					+	-					160	70	1.5					-	+					160	70	1.5		Abnormal movement is obvious
		Xiao Jiazeng	2024-08-14	Male	38	PD	16	Jiangsu	2023-08-18	Freezing	Gene, functional imaging	Yes	No	Level 1	15895069076	2025-08-18	Medoba 1/4-1/4-1/4, Senforo (0.25mg) 1-0-1	Medoba1/4-1/4-1/4，Senforo（0.25mg）1-0-1	Medtronic, 3389S, RC	STN	monopole	C+			2-						125	70	1.8		C+				11-					125	60	1		Annual follow-up: FDG PET shows low metabolism
		Hu Yijun	2024-08-14	Male	67	PD	12	Anhui	2023-08-30	-	-	Yes	Yes	Level 1	17858610437	2025-08-30	Medoba 1/4-1/4-1/4	Medoba1/4-1/4-1/4	jingyu1200-40 Lead；SR1101	STN		+		-	-						125	70	3.7		+			-						135	70	2.9		Annual follow-up: No significant changes in FDG PET compared to before
		Lu Meifang	2024-08-15	Female	58	Dystonia	3	Jiangsu	2024-07-05	Muscle tone disorder, jaw and limb tremor	-	No	No	Level 2	18913133386	2025-07-05	olanzapine 1.25mg qN, Duloxetine 60mg qd, Clonazepam 0.5mg bid, Baclofen 10mg bid	Clonazepam 1mg qN，Duloxetine 60mg qd，Baclofen 10mg bid，stop olanzapine，changed to Clozapine Before bedtime1/4tablets	jingyu1200-40 Lead；SR1101	STN		+			-						160	60	1.3		+			-						160	60	1.2		Patient with Parkinson's disease, consider DIP?PD? Recommended DAT, patient refused
		Zhou Naqin	2024-08-15	Female	72	PD	8	Jiangsu	2024-07-04	Trembling, slow, stiff, on-off phenomenon, freezing	-	Yes	No	Level 2	18061902578	2025-07-04	Senforo (0.25mg) 1-1-1, Medoba 1/2-1/2-1/2	Medoba1/4-1/4-1/4，B6 1tabletstid，Prapexor 0.25mg tid	Pingchi.1200-40 Lead；SR1101	STN	monopole	C+		2-							160	60	1.5mA	NA	C+		6-							160	60	1.0MA	NA
		Chen Longchang	2024-08-19	Male	73	PD	9	Jiangsu	2024-07-08	Tremor	-	Yes	No	Level 2	15162877951	2025-07-08	Medoba 3/4-3/4-3/4, diphenhydroxysol 1-1-1	Medoba1/2-1/2-1/2	Medtronic, 3389S, RC	STN		+		-							130	60	1.4	1558	+		-							130	60	1.5	1065
		Wang Shangjun	2024-08-19	Male	55	PD	15	Jiangsu	2024-07-09	Trembling, slow, stiff, abnormal movement, freezing	-	Yes	Yes	Level 1	15161916056	2025-07-09	Medoba 1/2-1/2-1/2, amantadine 1-1-1, Teshuda 1-0-1, Senforo (0.25mg) 1-0-1, diphenhydroxysol 1-0-0 (1-0-1)	Medoba1/4tabletstid，amantadine 1tabletsbid，Piribedil 50mg bid，Slaiglan morning1tablets，noon֨1tablets	Pingchi.1200-40 Lead；SR1101	STN					-	+					150	60	1.9	1784				-	+					130	60	1.35	1202	Upper body tremor, lower body abnormal movement
		Chen Liming	2024-08-20	Female	29	Dystonia	13	Fujian	2024-07-11	Abnormal walking posture, left toe up, right foot tense, right hand writing with force	Gene	No	No	Level 1	13489691555	2025-07-11	No	No	Pingchi.1200-40 Lead；SR1101	STN		+				-					130	60	2.2	1186	+				-					130	60	1.8	1064	Right-sided symptoms are severe, DYT1, patient of Dr. Jin Lirong
		Hu Baihe	2024-08-20	Male	70	PD	6	Anhui	2024-07-12	Slowness, rigidity, end-of-dose	-	Yes	No	Level 2	13905636101	2025-07-12	Medoba3/4-3/4-3/4, Xi Ning0-0-3/4, Prapexor (0.25mg) 2/3-2/3-2/3	Medoba1/2-1/2-1/2，Xi Ning 1/2tablets qN，Prapexor 0.25mg tid	Pingchi.1200-40 Lead；SR1101	STN		+			-						130	60	1.3	1143	+		-							130	60	1.5	926
		Xu Shufang	2024-08-21	Female	62	PD	13	Jiangsu	2023-08-17	Good condition	-	Yes	No	Level 2	13761148563	2025-08-17	Medoba1/4-0-0, amantadine1-0-0	Medoba1/4-0-0，amantadine1-0-0	Pingchi.1200-40 Lead；SR1101	STN		+		2-							130	60	1.7	1471	+		6-							130	60	1.6	1488	Annual follow-up patient refused to undergo PET, will not follow up next time
		Chen Kejin	2024-08-21	Male	67	PD	11	Jiangsu	2023-08-25	Sometimes freezing during turning and starting		Yes	No	Level 2	18962911162	2025-08-25	Medoba1/4-1/4-1/4	Medoba1/4-1/4-1/4	jingyu1200-40 Lead；SR1101	STN	monopole	C+			2-						125	70	3.2		C+		5-							95	80	3.3		Annual follow-up patient did not undergo PET, will not follow up next time
		Chen Kejin	2024-08-21	Male	67	PD	11	Jiangsu	2023-08-25	Sometimes freezing during turning and starting	-	Yes	No	Level 2	18962911162	2025-08-25	Medoba1/4-1/4-1/4	Medoba1/4-1/4-1/4	jingyu1200-40 Lead；SR1101	STN	monopole														C+			6-						95	80	3.1
		Zhao Cuilian	2024-08-22	Female	60	PD	15	chekiang	2024-07-12	Slow, end of the dose, abnormal movement, on-off phenomenon	-	Yes	Yes	Level 1	15990811151	2025-07-12	Medoba1-1-1-1/2, Kedan1-1-1, Prapexor (0.25mg) 1-1-1	Medoba1/2tabletstid，Prapexor0.25mg tid	jingyu1200-40 Lead；SR1101	STN					+	-					130	60	0.9		+		-							130	60	1.5
		Ling Fang	2024-08-22	Female	52	PD	6	Jiangsu	2024-07-14	Slow, stiff, on-off phenomenon, freezing	-	Yes	No	Level 2	15298599656	2025-07-14	Medoba1/2-3/4-1/2-3/4, Xi Ning1/2-1/2-1/2-1/2, Kedan1/2-1/2-1/2-1/2, amantadine1-0-0, Prapexor (0.25mg) 1-1-1	Medoba1/2tid，Xi Ning1/2tabletsqN，amantadine1-0-0，Prapexor 0.25mg tid	Medtronic, 3389S, RC	STN	monopole	C+			2-						130	60	1.5	1348	C+		9-							130	60	1.6	1870	Abnormal movement is obvious
		Wu Asan	2024-08-26	Male	71	PD	8	Shanghai	2024-07-18	Trembling, slow, stiff, freezing speech	-	Yes	No	Level 2	13601965262	2025-07-18	Medoba1/2-1/2-1/2	Medoba1/4-1/4-1/4	Medtronic, 3389S, RC	STN		+		1-							130	60	1.9	1280（1.5mA）	+		-							130	60	1.7v	1428（1.2mA）
		Liang Yuqin	2024-08-27	Female	72	PD	10	Hubei	2024-07-19	Tremor, slow, stiff, dyskinesia	-	Yes	No	Level 2	13986313684	2025-07-19	Medoba1/4-1/2-1/4-1/2, Prapexor (0.25mg) 1-1-1-1, Daringfu1/2-0-1/2-0, amantadine0-1-0-0	Medoba1/2-1/2-1/2-1/2,B6 1tabletsqid，Prapexor0.25mg 1tabletsqd，amantadine 1tabletsqd	Pingchi.1200-40 Lead；SR1101	STN		+				-					130	60	1.0V	1650				+	-					130	60	0.6V	938
		Lin Jiangen	2024-08-27	Male	60	PD	6	Fujian	2024-07-16	Slow, stiff, drug wearing off	-	Yes	No	Level 2	13850007578	2025-07-16	Medoba1/2-1/2-1/2, amantadine1-0-1-0, Teshuda0-1-0, Vitaminb6 1-1-1	Medoba1/4-1/4-1/4，amantadine1-1-0，Teshuda0-1-0	Pingchi.1200-40 Lead；SR1101	STN		+				-					130	60	1.55v	1520				+	-					130	60	0.8v	3422
		Mrs	2024-08-27	Male	59	PD	10	Anhui	2024-07-18	Trembling, slow, stiff, on-off phenomenon, forward rush, hunchback	Possible genetic mutation	Yes	Yes	Level 1	13655615060	2025-07-18	Medoba1/4-1/4-1/4, Xi Ning1/2-1/2-1/2, Prapexor (0.25mg) 1-1-1, Slaiglan1-1-0, diphenhydroxysol 1/4-1/4-1/4	diphenhydroxysol 0-1/2-0，Medoba1/4-1/4-1/4，Prapexor（0.25mg）1-1-1，Slaiglan1-1-0	Medtronic, 3389S, RC	STN	Program GroupA	C+			2-						130	60	1.45v	1490（1.0mA）	C+			10-						130	60	1.45v	1188（1.2mA）
		Liu Jian	2024-08-27	Male	59	PD	10	Anhui	2024-07-18	Trembling, slow, stiff, on-off phenomenon, forward rush, hunchback	Possible genetic mutation	Yes	Yes	Level 1	13655615060	2025-07-18	Medoba1/4-1/4-1/4, Xi Ning1/2-1/2-1/2, Prapexor (0.25mg) 1-1-1, Slaiglan1-1-0, diphenhydroxysol 1/4-1/4-1/4	diphenhydroxysol 0-1/2-0，Medoba1/4-1/4-1/4，Prapexor（0.25mg）1-1-1，Slaiglan1-1-0	Medtronic, 3389S, RC	STN	Program GroupB	C+				3-					130	60	1.5v	1237	C+				11-					130	60	1.5v	1464	After turning on the device, it was found that the patient still had a spastic gait in both lower limbs, with ankle clonus (+). Genetic testing was recommended, but the patient refused
		Qiao Wei	2024-08-29	Female	60	PD	13	Gansu	2024-07-17	Trembling, on-off phenomenon	-	Yes	Yes	Level 1	13830006088	2025-07-17	Medoba1/2-1/2-1/2-1/2, Xi Ning1/2-0-1/2, Prapexor (0.25mg) 1-0-1, amantadine1-1-1-0, diphenhydroxysol 1/2-1/2-1/2, Vitaminb6 1-1-1-1, Clozapine0-0-0-1/8	Medoba1/4-1/4-1/4，Vitaminb6 1-1-1，Prapexor（0.25mg）1-0-1，amantadine1-1-0，diphenhydroxysol 1/2-0-1/2，Clozapine0-0-1/8	jingyu1200-40 Lead；SR1101	STN		+			-						150	60	1.4v		+			-						130	60	1.4v
		Chen Yuanbi	2024-08-29	Female	61	Meige	8	Guizhou	2024-07-19	Meige	-	No	No	Level 2	18385154136	2025-07-19	No	No	jingyu1200-40 Lead；SR1101	STN		+			-						130	60	2.4v		+			-						130	60	2.3v
		Su Yongsheng	2024-09-02	Male	55	PD	8	chekiang	2024-07-23	Stiffness, difficulty turning over, pain	-	Yes	Yes	Level 1	13868677691	2025-07-23	Medoba1/2-1/2-1/2-1/2, Daringfu1-1-1-0, Xi Ning0-0-0-1/2, amantadine1-1-0, Senforo (0.25mg) 1/2-1/2-1/2-1/2, diphenhydroxysol 1/2-0-1/2, midopy1-1-0-0	Medoba1/4 tabletstid，diphenhydroxysol 1/2tabletsbid，Senforo0.25mg/tablets 1/2tabletsqid	Pingchi.1200-40 Lead；SR1101	STN	monopole	C+		2-							130	60	1.2mA	未测	C+		6-							130	60	2.1mA	未测
		Liu Zuoting	2024-09-03	Male	74	PD	15	chekiang	2024-07-26	Trembling, slow, stiffness, fluctuation, Abnormal movement	-	Yes	No	Level 2	13967972448	2025-07-26	Medoba1/2-1/2-1/2-1/2, Xi Ning1/2-0-1/2, amantadine1-0-1, Kedan1/2-0-1/2, Prapexor (0.25mg) 2-2-2, Slaiglan1-0-0	Medoba1/2-1/2-1/2-1/2，amantadine1-0-1，Prapexor（0.5mg）1-1-1，Slaiglan1-0-0	jingyu1200-40 Lead；SR1101	STN		+		-							130	60	1.3		+			-						140	70	1.7
		Zhong Jianjun	2024-09-04	Male	50	PD	9	chekiang	2024-07-24	Trembling, slow, stiffness, fluctuation	-	Yes	Yes	Level 1	13958669804	2025-07-24	Medoba3/4-3/4-3/4-3/4-3/4, Senforo (0.25mg) 1-0-1, diphenhydroxysol 1/2-0-1/2, Vitaminb6 1-1-1	Medoba1/4-1/4-1/4，Senforo（0.25mg）1-0-1，diphenhydroxysol 1/2-0-1/2，Vitaminb6 1-1-1	Medtronic, 3389S, RC	STN		+		-							130	60	2.1	1234（1.7mA）	+		-							130	60	1.3	1350（0.9mA）
		Wang Zhiguo	2024-09-05	Male	54	PD	10	Hunan	2024-07-25	Hand trembling, more severe on the right, slow walking, limb stiffness	-	Yes	Yes	Level 1	13221929765	2025-07-25	Medoba1-1-1, Senforo (0.25mg) 1/2-1/2-1/2	Medoba1/2tabletstid，Senforo（0.25mg）1/2-1/2-1/2	Pingchi.1200-40 Lead；SR1101	STN		+			-						130	60	1.5mA	未测	+			-						130	60	1.0mA	未测
		Shen Huancheng	2024-09-05	Male	44	PD	8	chekiang	2023-08-10	-	-	Yes	Yes	Level 1	13968303498	2025-08-10	No	No	Pingchi.1200-40 Lead；SR1101	STN		+		-							115	70	2.55		+			-						115	80	2.25
		Shen Huancheng	2024-09-05	Male	44	PD	8	chekiang	2023-08-10	-	-	Yes	Yes	Level 1	13968303498	2025-08-10	No	No	Pingchi.1200-40 Lead；SR1101	STN			-								115	60	1.65
		Wang Wei	2024-09-05	Male	48	PD	6	chekiang	2023-09-04	Poor speech fluency, poor memory and comprehension, answering questions according to one's own logic	Gene, PET	Yes	Yes	Level 1	13505745847	2025-09-04	Medoba1/2-1/2-1/2-1/2, Clozapine0-0-0-1/2, Venlafaxine0-0-0-1, Rivalatine汀 (3.0mg) 1-0-1, Melatonin0-0-0-2	Medoba1/2-1/2-1/2-1/2，Clozapine0-0-0-1/2，៧ᔩἵ䇻0-0-0-1，RivalatineẠ（3.0mg）1-0-1，Melatonin0-0-0-2	Medtronic, 3389S, RC	GPI		+		-							130	80	2.4mA		+			-						130	80	2.9mA
		Fan Jiawei	2024-08-29	Male	25	Dystonia	5	Liaoning	2022-11-15	Head tilting back again in the past two months, symptoms worsened after medication, easy to close eyes, right side, unstable walking	Gene	No	No	Level 1	13591399343	2024-11-15	No	No	jingyu1200-40 Lead；SR1101	GPI		+		-							115	180	2.5		+	-								115	170	2.7
		Fan Jiawei	2024-09-02	Male	25	Dystonia	5	Liaoning	2022-11-15	-	Gene	No	No	Level 1	13591399343	2024-11-15	diphenhydroxysol 1/2-1/2-1/2, Baclofen1/2-1/2-1/2, Clonazepam0-0-0-1/4, CoenzymeQ10 2-2-2, VE 1-0-0, levocanitine, compound Vitamin1-1-1	diphenhydroxysol 1-1-1，Baclofen1-1-1，Clonazepam0-0-0-1/2，CoenzymeQ10 2-2-2，VE 1-0-0，levocanitine，compoundVitaminb1-1-1	jingyu1200-40 Lead；SR1101	GPI		+		-							130	160	2.7		+	-								130	160	2.7
		Yue Huijuan	2024-09-04	Female	60	SCA12	7	Jiangsu	2022-11-08	-	Gene, VIM-PSA	No	No	Level 1	13812752331	2024-11-08	No	No	jingyu1200-40 Lead；SR1101	VIM-PSA		+	-	-							200	80	3.9		+	-								170	70	3.6
		Yu Fan	2024-09-04	Female	56	CBA	12	Shanghai	2019-08-01	Stiffness, forward propulsion, difficulty opening left eyelid, soft speech	Gene, PET	No	No	Level 1	13611991846	2025-08-01	Medoba1/2-3/8-3/8-1/4	Medoba1/2-3/8-3/8-1/4	Medtronic, 3389S, RC	STN		+		-							85	60	2.2		+		-							85	70	3.3
		Yu Fan	2024-09-04	Female	56	CBA	12	Shanghai	2019-08-01	Stiffness, forward propulsion, difficulty opening left eyelid, soft speech	Gene, PET	No	No	Level 1	13611991846	2025-08-01	Medoba1/2-3/8-3/8-1/4	Medoba1/2-3/8-3/8-1/4	Medtronic, 3389S, RC	STN		+				-					85	60	2.8		+				-					85	60	2.3
		Ge Yunchu	2024-09-09	Male	67	PD	10	Shanghai	2024-08-03	Slow, stiff, fluctuation, Abnormal movement, freezing, left arm swelling	Dyskinesia, freezing	Yes	Yes	Level 1	18930711392	2025-08-03	Xi Ning1/2-1/2-1/2-1/2, Medoba1/2-1/2-1/2-1/2, Vitaminb6 1-1-1-1	Medoba1/2-1/2-1/2	Medtronic, 3389S, RC	STN		+			-						110	60	1.3	NA	+		-							110	70	1.9	NA
		Tang Genbao	2024-09-10	Male	69	PD	10	Shanghai	2024-07-29	Slow, stiff, difficulty starting, falling	-	Yes	No	Level 2	13916395281	No	Medoba1-3/4-3/4, Kedan1/2-1/2-1/2, Vitaminb6 1-1-1, Prapexor (0.25mg) 1/2-1/2-1, amantadine1/2-1/2-0, Daringfu0-0-0-1	Medoba1/2-1/2-1/2，Vitaminb6 1-1-1，amantadine1/2-1/2-0	Medtronic, 3389S, RC	STN	monopole	C+		-							130	70	1.8	NA	C+		-							130	70	2.1	NA
		Zhang Qingmei	2024-09-11	Female	57	Meige	5	Jiangsu	2024-07-31	Oral, jaw, eyelid muscle tone disorder	-	No	No	Level 3	13914576383	No	Botulinum toxin injection 3 times, the effect is maintained for 4 months	No	Pingchi.1200-40 Lead；SR1101	STN	monopole	C+				-					130	60	1.6	1691	C+				-					130	60	1.5	1353
		Zhang Hezhong	2024-09-12	Male	64	PD	4	Henan	2024-08-05	Waning medication effect, Abnormal movement, freezing	Dyskinesia, freezing	Yes	No	Level 2	18538085293	No	Medoba1-1-1, Prapexor (0.25mg) 1-1-1, Xi Ning 1-1/2-1	Medoba1/2-1/2-1/2，Xi Ning1/2-1/2-1/2	Pingchi.1200-40 Lead；SR1101	STN		+		-							130	60	1.4	1012	+		-							130	60	1.6	1077
		Yan Changguan	2024-09-13	Male	67	PD	10	Shanghai	2024-08-02	Trembling, more severe on the right	-	Yes	No	Level 2	13916551139	No	Medoba 1/2-1/2-1/2-1/2, Xi Ning 3/4-3/4-3/4-3/4, Prapexor (0.25mg) 1/2-1/2-1/2-1	Medoba1/2-1/2-1/2，Xi Ning1/2tabletstid，Prapexor（0.25mg）1/2-1/2-1/2-1	Medtronic, 3389S, RC	STN		+			-						130	60	1.5	NA	+		-							130	60	1.6	NA
		Wang Jiacui	2024-09-13	Female	34	PD	12	chekiang	2024-07-27	Stiffness	ppc, gene	Yes	No	Level 1	19301446998	No	Medoba 1/4-1/4-1/4-1/4, Xi Ning 1-1-1-1, amantadine 1-1-1-1	Medoba1/4-1/4-1/4-1/4，Xi Ning1/2 tabletsqid，amantadine1-1-1-1	Medtronic，3389S，PPC	STN		+			-						130	60	0.9mA	1472	+			-						130	60	1.3mA	1686
		Wu Banglan	2024-09-18	Female	67	PD	8	Jiangsu	2024-08-12	Speech unclear	-	Yes	Yes	Level 1	13905264058	2025-08-12	Medoba 1/2-1/2-1/2-1/2, Xi Ning 1-1-1-1, Prapexor (0.25mg) 1-1-1-1, Donepezil 1-0-0, diphenhydroxysol 1/2-1/2-0, olanzapine 1-0-0, Midojun 1-1-0, Vitaminb6 1-1-1-1, Zopiclone 0-0-0-1	Medoba1/2-1/2-1/2，Prapexor（0.25mg）1-1-1，RivalatineẠ 1.5mg bid，Osping1-0-0，Midojun1-1-0，Zopiclone0-0-0-1	Pingchi.1200-40 Lead；SR1101	STN		+			-						130	60	1.5	992	+			-						130	60	1.1	1654
		Li Jie	2024-09-19	Male	50	PD	5	Anhui	2024-08-08	Stiffness, difficulty turning over	GPI, gene	Yes	Yes	Level 1	15257163322	2025-08-08	Xi Ning 0-0-0-1/2, amantadine 1/2-1/2-1/2, Prapexor (0.25mg) 1-1-1, dobasazine 1/2-1/2-1/2-1/2, Clozapine 1/2-0-1/2, diphenhydroxysol 1-0-0	Xi Ning0-0-0-1，amantadine1/2-1/2-1/2，Prapexor（0.25mg）1-1-1，dobasazine1/2-1/2-1/2-1/2，Clozapine1/4tabletstid，diphenhydroxysol 1/2tabletsbid	jingyu1200-40 Lead；SR1101	GPI		+		-							130	70	2		+	-								130	70	2.2
		Chen Jing	2024-09-11	Female	48	GBA	16	chekiang	2017-05-19	Annual follow-up	GPI, gene, annual follow-up	No	Yes	Level 1	13676708102	2025-05-19	Medoba 1/4-1/4-1/4-1/4-1/4-1/4, Xi Ning 1/2-0-1/2, Clozapine 0-0-0-1/2, Opikapone 0-0-0-1	Medoba1/4-1/4-1/4-1/4-1/4-1/4，Xi Ning1/2-0-1/2，Clozapine0-0-0-1/2，Opikapone0-0-0-1	Medtronic, 3389S, RC	GPI		C+				-					125	90	4.6	941（4.8mA）	C+			-						125	80	3.7	833（4.2mA）
		Chen Jing	2024-09-11	Female	48	GBA	16	chekiang	2017-05-19	Annual follow-up	GPI, gene, annual follow-up	No	Yes	Level 1	13676708102	2025-05-19	Medoba 1/4-1/4-1/4-1/4-1/4-1/4, Xi Ning 1/2-0-1/2, Clozapine 0-0-0-1/2, Opikapone 0-0-0-1	Medoba1/4-1/4-1/4-1/4-1/4-1/4，Xi Ning1/2-0-1/2，Clozapine0-0-0-1/2，Opikapone0-0-0-1	Medtronic, 3389S, RC	GPI		C+		-							125	90	3.4	1199（2.8mA）	C+	-								125	60	2.45	1032（2.4mA）
		Feng Yuefen	2024-09-11	Female	71	PD	13	chekiang	2023-09-08	Shortness of breath one hour after meals, improves after one hour, blurred vision, difficulty turning over, freezing, stiff starting	Annual follow-up	Yes	Yes	Level 1	13705849855	2025-09-08	Medoba 1/2-1/2-1/2	Medoba1/4-1/4-1/4	Medtronic, 3389S, RC	STN		+		-							95	60	0.6mA	1300（0.8v）	+			-						95	60	1.4mA	1156（1.7v）
		Feng Yuefen	2024-09-11	Female	71	PD	13	chekiang	2023-09-08	Shortness of breath one hour after meals, improves after one hour, blurred vision, difficulty turning over, freezing, stiff starting	Annual follow-up	Yes	Yes	Level 1	13705849855	2025-09-08	Medoba 1/2-1/2-1/2	Medoba1/4-1/4-1/4	Medtronic, 3389S, RC	STN		+			-						95	60	0.9mA	1175（1.1）
		Liao Qijun	2024-09-18	Male	56	PD	10	Shenzhen	2017-04-17	-	GPI, gene, annual follow-up	No	Yes	Level 1	13510726703	2025-04-17	Xi Ning 1/4 qN	Xi Ning1/4qN	Medtronic, 3389S, RC	GPI		+			-	-					170	90	2.7	645 (4.1mA)	+			-	-					170	90	2.7	708(3.9mA)
		Teng Zhongrong	2024-09-18	Male	60	PD	11	Anhui	2023-09-14	Freezing	GPI, gene, annual follow-up	Yes	Yes	Level 1	18555333722	2025-09-14	Medoba 1/2-1/2-1/2, Senforo (0.375mg) 1-1-1, diphenhydroxysol 1/2-0-1/2	Medoba1/2-1/2-1/2，Senforo（0.375mg）1-1-1，diphenhydroxysol 1/2-0-1/2	Pingchi.1200-40 Lead；SR1101	STN		+		-							105	70	2.65	1376	+		-							105	70	2.65	1223
		Teng Zhongrong	2024-09-18	Male	60	PD	11	Anhui	2023-09-14	Freezing	GPI, gene, annual follow-up	Yes	Yes	Level 1	18555333722	2025-09-14	Medoba 1/2-1/2-1/2, Senforo (0.375mg) 1-1-1, diphenhydroxysol 1/2-0-1/2	Medoba1/2-1/2-1/2，Senforo（0.375mg）1-1-1，diphenhydroxysol 1/2-0-1/2	Pingchi.1200-40 Lead；SR1101	STN		+				-					105	70	2.4	1339	+				-					105	70	2.35	1430
		Tian Zhi Pan	2024-09-18	Male	57	PD	14	Jiangsu	2022-02-21	Freezing, speech unclear, waning medication effect	Annual follow-up	No	No	Level 3	13002174588	No	Medoba 1/2-1/2-1/2, diphenhydroxysol 1/2-1/2-1/2	Medoba1/2-1/2-1/2，diphenhydroxysol 1/2-1/2-1/2	Pingchi.1200-40 Lead；SR1101	STN		+		-							140	90	3.65	1591	+			-						140	80	3.45	1298
		Tian Zhi Pan	2024-09-18	Male	57	PD	14	Jiangsu	2022-02-21	Freezing, speech unclear, waning medication effect	Annual follow-up	No	No	Level 3	13002174588	No	Medoba 1/2-1/2-1/2, diphenhydroxysol 1/2-1/2-1/2	Medoba1/2-1/2-1/2，diphenhydroxysol 1/2-1/2-1/2	Pingchi.1200-40 Lead；SR1101	STN		+			-						140	90	3.95	1713	+		-							140	90	3.6	1590
		Yang Guiying	2024-09-11	Female	61	PD	9	Heilongjiang	2024-06-14	Trembling of left upper limb	Poor self-conscious effect hospitalization program control after device activation	Yes	No	Level 2	15846668889	No	Medoba 1/4-1/4-1/4✖️4 days ➡️ 1/2-1/2-1/2	Xi Ning1/2-1/2-1/2	Medtronic, 3389S, RC	STN		+		-							100	60	1.7v	1405(1.2mA)	+		-	-						100	60	2.35v	751(3.0mA)
		Yang Guiying	2024-09-11	Female	61	PD	9	Heilongjiang	2024-06-14	Trembling of left upper limb	Poor self-conscious effect hospitalization program control after device activation	Yes	No	Level 2	15846668889	No	Medoba 1/4-1/4-1/4✖️4 days ➡️ 1/2-1/2-1/2	Xi Ning1/2-1/2-1/2	Medtronic, 3389S, RC	STN			+		-						100	60	1.7v	2924(0.5mA)	+				-					100	60	2.15v	1078(1.9mA)
		Shao Jianchao	2024-09-23	Male	58	Meige	4	Shanghai	2024-08-12	Difficulty opening eyes (明显 when reading, walking)	-	No	No	Level 3	13564658123	No	No	No	jingyu1200-40 Lead；SR1101	STN		+				-					130	60	1.5		+				-					130	60	1.5
		Thank you, Fengdi	2024-09-24	Female	72	PD	8	Shanghai	2024-08-19	Slow, stiff, freezing, more severe on the left, on-off, Abnormal movement	Eight points of contact	No	No	Level 2	13818466408	No	Medoba 1/2-1/2-1/2, Xi Ning 1/2-1/2-1/2-1, amantadine 1-0-1, Prapexor (0.375mg) 1-0-1	Xi Ning0-0-0-1/2，Medoba1/2-1/2-1/2，amantadine1-0-1-0	Jing Yu1202-S Lead；SR1101-16	STN		+						-			140	70	2		+					-				140	70	2
		Thank you, Fengdi	2024-09-24	Female	72	PD	8	Shanghai	2024-08-19	Slow, stiff, freezing, more severe on the left, on-off, Abnormal movement	Eight points of contact	No	No	Level 2	13818466408	No	Medoba 1/2-1/2-1/2, Xi Ning 1/2-1/2-1/2-1, amantadine 1-0-1, Prapexor (0.375mg) 1-0-1	Xi Ning0-0-0-1/2，Medoba1/2-1/2-1/2，amantadine1-0-1-0	Jing Yu1202-S Lead；SR1101-16	STN		+	-								60	70	1.6		+	-								60	70	1.6
		Serving the establishment of the state	2024-09-24	Male	67	PD	7	Jiangsu	2024-08-14	Slow, stiff, freezing	Freezing	Yes	No	Level 2	15251139958	No	Medoba 1/2-1/2-1/2-1/2-1/2, Ntakapong 1/2-1/2-1/2-1/2-1/2, Xi Ning 1/2-1/2-1/2-1/2-1/2, Teshuda 1-0-0-1-0, amantadine 1/2-1/2-0-0-0, Vitaminb6 1-1-1-1-1	Medoba1/2-1/2-1/2，Xi Ning0-0-0-1/2，amantadine1/2-1/2-0	Pingchi.1200-40 Lead；SR1101	STN		+			-						130	60	1.8	NA	+		-							130	60	1.8	NA
		Jiang Jiansheng	2024-09-25	Male	70	PD	10	Jiangxi	2024-08-13	Freezing	Freezing	Yes	No	Level 2	15350006201	No	Medoba 1-1-1-1	Medoba1/2-1/2-1/2，Senforo（0.25mg）1/2-1/2-1/2	Pingchi.1200-40 Lead；SR1101	STN		+		-							110	70	1.8	1215	+		-							110	70	1.7	1369
		Zhou Huabi	2024-09-25	Female	60	PD	9	Sichuan	2024-08-16	Hypokinesia and rigidity	Eight points of contact	Yes	No	Level 2	18981013468	No	Medoba 1/2-1/2-3/4-3/4-1/2-1/2	Medoba1/2-1/2-1/2-1/2-1/2-1/2	Jing Yu1202-S Lead；SR1101-16	STN		+				-					160	60	2		+				-					130	60	1.7
		Zhou Huabi	2024-09-25	Female	60	PD	9	Sichuan	2024-08-16	Hypokinesia and rigidity	Eight points of contact	Yes	No	Level 2	18981013468	No	Medoba 1/2-1/2-3/4-3/4-1/2-1/2	Medoba1/2-1/2-1/2-1/2-1/2-1/2	Jing Yu1202-S Lead；SR1101-16	STN		+						-			160	60	1.9
		Tang Fengmei	2024-09-26	Female	82	PD	9	Shanghai	2024-08-20	Tremor	Unilateral DBS, left STN	Yes	Yes	Level 1	17717029898	2025-08-20	Medoba 1-1-1, diphenhydroxysol 1/2-1/2-1/2, Prapexor (0.375mg) 1-0-0	Medoba1/2-1/2-1/2，diphenhydroxysol 1/2-1/2-1/2，Prapexor（0.375mg）1-0-0	Medtronic, 3389S, RC	STN		+				-					150	60	1.2	NA
		Wu Yuefen	2024-09-26	Female	64	PD	10	chekiang	20024/8/22	Abnormal movement, slow movement, poor medication effect	Eight points of contact	Yes	Yes	Level 1	18768318405	2025-08-22	Medoba 1/2-1/2-1/2-1/2, Xi Ning 0-0-0-1/2, Daringfu 1/2-1/2-1/2-1/2, Vitaminb6 1-1-1-1	Medoba1/2-1/2-1/2-1/2	Jing Yu1202-S Lead；SR1101-16	STN		+				-					130	60	1.1		+				-					130	60	1
		Zhang Huomei	2024-09-29	Female	69	PD	15	chekiang	2024-08-21	Slow, stiff, on-off, Abnormal movement	On-off, dyskinesia	Yes	No	Level 2	13588096983	No	Medoba 1/2-1/2-1/2-1/2, Teshuda 1-0-1	Medoba1/2-1/2-1/2-1/2，Teshuda1/2-0-1/2	Pingchi.1200-40 Lead；SR1101	STN		+		-							130	70	1.7	NA	+		-							130	70	1.5	NA
		Wang Wenhua	2024-09-29	Female	54	PD	10	Anhui	2024-08-20	Bradykinesia, rigidity	-	Yes	No	Level 2	18267954733	No	Medoba 3/4-3/4-3/4, Prapexor (0.25mg) 2-2-2, Slaiglan 1-0-1, amantadine 1-1-0	Medoba1/2-1/2-1/2，Prapexor（0.25mg）1-1-1，Slaiglan1-0-1	Pingchi.1200-40 Lead；SR1101	STN		+			-						130	60	1	NA	+		-							130	60	0.9	NA
		Huang Farong	2024-09-29	Male	65	PD	8	chekiang	2024-08-26	Dyskinesia	Dyskinesia	Yes	No	Level 2	15869055630	No	Medoba 3/4-3/4-3/4, Senforo (0.25mg) 3-3-3, Resa Gilan 1-0-0	Medoba1/2-1/2-1/2，Senforo（0.25mg）1-1-1，Resa Gilan1-0-0，amantadine 1tabletsmorning1tabletsnoon	Pingchi.1200-40 Lead；SR1101	STN		+			-						130	70	0.8		+			-						130	60	1.1
		Wang Daoming	2024-10-08	Male	70	PD	9	Jiangsu	2024-08-27	Stiffness, freezing, difficulty starting, more severe on the right	-	Yes	Yes	Level 1	18662057639	2025-09-27	Medoba 1-1-1-1/2, Prapexor (0.25mg) 1-1-1, amantadine 1-1-0, diphenhydroxysol 1-0-1, Daringfu 1-1-1	Medoba1/2-1/2-1/2-1/2，Senforo（0.25mg）1-1-1，amantadine1-1-0，diphenhydroxysol 1-0-1，Daringfu1/2-1/2-1/2	Pingchi.1200-40 Lead；SR1101	STN		+			-						120	70	1.9	NA	+			-						120	70	1.6	NA
		Yang Jichun	2024-10-08	Male	54	PD	9	chekiang	2024-08-29	Tremor, slow	-	Yes	Yes	Level 1	13819171271	2025-08-29	Daringfu 1-1-1-1, Vitaminb6 1-1-1, Silem 1/2-1/2-1/2-1/2, diphenhydroxysol 1/2-0-0, amantadine 1-1-0, Teshuda 1-0-1	Daringfu1/2-1/2-1/2-1/2，Silem1/4-1/4-1/4，diphenhydroxysol 1/2-0-0，amantadine1-1-0，Teshuda1-0-1	Pingchi.1200-40 Lead；SR1101	STN		+				-					150	60	1.7mA	NA	+			-						150	60	1.4mA	NA
		Li ping	2024-10-08	Female	47	PD	17	Shanghai	2024-08-27	Difficulty starting, abnormal movement, hands tremble	Eight points of contact, gene, PARK2	Yes	Yes	Level 1	13651696685	2025-08-27	Medoba 1/2-1/2-1/2, diphenhydroxysol 1-1-1, amantadine 3/2-3/2-1, Clozapine 3/4-3/4-1, Xi Ning 1/2-0-1/2	Medoba1/2-1/2-1/2，diphenhydroxysol 1-1-1，amantadine1-1-1，Clozapine1/2-1/2-3/4，Xi Ning1/4-0-1/4	Jing Yu1202-S Lead；SR1101-16	STN		+						-			120	60	1.3		+						-			120	60	1.7
		Zhang Jiaping	2024-10-08	Male	64	PD	20	chekiang	2024-08-30	Abnormal movement, freezing, freezing on/off	-	Yes	No	Level 2	15868848695	No	Xi Ning 0-0-1, Senforo (0.25mg) 3-0-3, Silem 3/4-1/2-3/4-1/2, amantadine 1-1/2-1/2	Xi Ning0-0-1/2，Prapexor（0.25mg）1-1-2，amantadine1-1/2-1/2，Silem1/2-1/2-1/2	Pingchi.1200-40 Lead；SR1101	STN		+				-					145	80	1.8	1228	+	-								145	60	1.5	1450
		Zhang Jiaping	2024-10-08	Male	64	PD	20	chekiang	2024-08-30	Abnormal movement, freezing, freezing on/off	-	Yes	No	Level 2	15868848695	No	Xi Ning 0-0-1, Senforo (0.25mg) 3-0-3, Silem 3/4-1/2-3/4-1/2, amantadine 1-1/2-1/2	Xi Ning0-0-1/2，Prapexor（0.25mg）1-1-2，amantadine1-1/2-1/2，Silem1/2-1/2-1/2	Pingchi.1200-40 Lead；SR1101	STN		+		-							145	60	1.3	1544	+			-						145	80	1.8	1027
		Yang Yunyi	2024-10-09	Male	68	PD	11	chekiang	2024-09-03	Slow, stiff, freezing	Freezing	Yes	Yes	Level 1	18758172666	2025-09-03	Medoba 1-1-1-1-1, Senforo (0.25mg) 1-1-1-1-1	Medoba1/2-1/2-1/2-1/2-1/2，Senforo（0.25mg）1-1-1-1-1	Medtronic, 3389S, RC	STN		+				-					115	60	1.6	1303	+		-							115	60	1.6	1336
		Dong Minyue	2024-10-09	Female	71	PD	9	Jiangsu	2024-09-03	Trembling in both lower limbs	-	Yes	Yes	Level 1	18052726116	2025-09-03	Medoba 3/4-3/4-3/4-3/4, Kedan 1/2-1/2-1/2-1/2, Prapexor (0.25mg) 1-1-1-1, diphenhydroxysol 1/2-1/2-1/2, Slaiglan 1-1-0, lorazepam 0-0-0-1	Medoba1/2-1/2-1/2-1/2，Prapexor（0.25mg）1-1-1-1，Slaiglan1-1-0，lorazepam0-0-0-1	Medtronic, 3389S, RC	STN		+			-						125	60	2.1	1298	+				-					125	60	1.7	1261
		Chen Wanming	2024-10-10	Male	70	PD	4	chekiang	2024-09-04	Dyskinesia	PET	Yes	Yes	Level 1	13750798806	2025-09-04	Medoba 1/4-1/4-1/4-1/4, Daringfu 1/2-0-0-0, Resa Gilan 1-0-0, amantadine 1/2-0-1/2, Ropinirole 1/2-1/2-1/2, Baclofen 0-0-0-1/2, alprazolam 仑 0-0-0-1	Medoba1/4-1/4-1/4-1/4，Resa Gilan1-0-0，amantadine1/2-0-1/2，Ropinirole1/2-1/2-1/2，Baclofen0-0-0-1/2，alprazolamı0-0-0-1	Medtronic, 3389S, RC	STN		+			-						130	60	1.5	NA	+			-						130	60	1.7	NA
		Sun Jianhua	2024-10-11	Female	52	Meige	7	Sichuan	2024-09-04	Meige	-	No	No	Level 2	18011629628	No	No	No	Medtronic, 3389S, RC	STN		+			-						130	60	1.2	NA	+			-						130	60	1.2	NA
		Gu Nini	2024-10-09	Female		PD	8	chekiang	2024-06-05	20 minutes before the medication takes effect, a sense of convulsion, unable to turn over when the medication is not effective, left heel gripping the ground, chest tightness	-	No	No	Level 3	13065558108	No	Medoba 1/2-1/2-1/2-1/2-1/2, Xi Ning 1/2-1/2-1/2-1/2	Medoba1/4-1/4-1/4-1/4-（1/4）	Pingchi.1200-40 Lead；SR1101	STN		+			-						140	70	2.6	1393	+			-						140	70	3	1083	Programming 4 months after turning on the device, no video recorded
		Gu Nini	2024-10-09	Female	57	PD	8	chekiang	2024-06-05	20 minutes before the medication takes effect, a sense of convulsion, unable to turn over when the medication is not effective, left heel gripping the ground, chest tightness	-	No	No	Level 3	13065558108	No	Medoba 1/2-1/2-1/2-1/2-1/2, Xi Ning 1/2-1/2-1/2-1/2	Medoba1/4-1/4-1/4-1/4-（1/4）	Pingchi.1200-40 Lead；SR1101	STN		+		-							140	60	2	1454	+		-							140	70	2.6	1002	Programming 4 months after turning on the device, no video recorded
		Li Yan'er	2024-10-10	Female	66	PD	11	Shanghai	2023-09-14	Weakness on the right side, abnormal movement, freezing on/off	-	Yes	Yes	Level 1	13917909881	2025-09-14	Medoba 1/4-1/4-1/4-1/4	Medoba1/4-1/4-1/4-1/4	Medtronic, 3389S, RC	STN		+				-					115	60	2.0mA	1185（2.4v）	+			-						115	70	2.0mA	1130（2.3v）
		Li Yan'er	2024-10-10	Female	66	PD	11	Shanghai	2023-09-14	Weakness on the right side, abnormal movement, freezing on/off	-	Yes	Yes	Level 1	13917909881	2025-09-14	Medoba 1/4-1/4-1/4-1/4	Medoba1/4-1/4-1/4-1/4	Medtronic, 3389S, RC	STN		+		-							115	60	1.8mA	1147（2.1v）
		Cao Jiankang	2024-10-10	Male	61	PD	9	Jiangsu	2023-09-19	Abnormal movement, difficulty opening eyes, excessive salivation	-	Yes	Yes	Level 1	13776289230	2025-09-19	Medoba 1/4-1/4-1/4	Medoba1/4-1/4-1/4	Medtronic, 3389S, RC	STN		+			-						115	60	3	1034（2.9mA）	+		-							115	60	2.1	1160（1.8）
		Cao Jiankang	2024-10-10	Male	61	PD	9	Jiangsu	2023-09-19	Abnormal movement, difficulty opening eyes, excessive salivation	-	Yes	Yes	Level 1	13776289230	2025-09-19	Medoba 1/4-1/4-1/4	Medoba1/4-1/4-1/4	Medtronic, 3389S, RC	STN		+		-							115	60	1.1	1436（0.8mA）	+				-					115	60	1.5	1423（1.1）
		Zhou Junli	2024-10-10	Female	55	GBA	7	Shanghai	2021-09-28	Stiffness in the left upper limb, unstable gait, after taking medication abnormal movement,表现为 unstable gait	PET, GBA	No	No	Level 3	13916504042	No	Xi Ning 1/2-1/2-1/2-1. Clonazepam 0-0-0-1/3	Xi Ning1/2-1/2-1/2-1.Clonazepam0-0-0-1/4	Medtronic, 3389S, RC	STN		+				-					135	60	2.9	1121	+		-		-					135	60	2.8	753
		Yu Guangqun	2024-10-14	Male	72	PD	10	chekiang	2024-09-10	Trembling, slow, stiff, freezing, abnormal movement	PET	Yes	Yes	Level 1	18916194657	2025-09-10	Medoba 1/2-1/4-1/4, Xi Ning 1/2-1-1, Senforo (0.25mg) 1-1-1, Vitaminb6 1-1-1	Medoba1/2-1/2-1/2，Senforo（0.25mg）1-1-1	Medtronic, 3389S, RC	STN		+			-						125	70	2.1	NA	+			-						125	60	1.2	NA
		Yu Guangqun	2024-10-14	Male	72	PD	10	chekiang	2024-09-10	Trembling, slow, stiff, freezing, abnormal movement	PET	Yes	Yes	Level 1	18916194657	2025-09-10	Medoba 1/2-1/4-1/4, Xi Ning 1/2-1-1, Senforo (0.25mg) 1-1-1, Vitaminb6 1-1-1	Medoba1/2-1/2-1/2，Senforo（0.25mg）1-1-1	Medtronic, 3389S, RC	STN															+		-							125	60	1	NA
		Lü Ruijun	2024-10-14	Male	57	PD	7	Shandong	2024-09-11	Bradykinesia, abnormal movement, end of the dose		Yes	Yes	Level 1	13863448833	2025-09-11	Medoba 1/2-1/2-1/2, Daringfu 1-1-1, Prapexor (0.25mg) 1-1-1-1, Xi Ning 0-0-0-1, Ntakapong 0-0-0-1	Medoba1/4-1/4-1/4，Prapexor（0.25mg）1-1-1，Xi Ning0-0-0-1/2	Medtronic, 3389S, RC	STN		+		-							130	60	1.4	NA	+		-							130	60	1.1	NA
		Zheng Yufang	2024-10-15	Female	50	PD	7	Fujian	2024-09-06	Stiffness	-	Yes	No	Level 2	13105962288	No	Medoba 1/2-1/2-1/2-1/2, Kedan 1-1-1-1, Xi Ning 0-0-0-1	Medoba1/4-1/4-1/4-1/4，Xi Ning0-0-0-1/2，Kedan 1-1-1	jingyu1200-40 Lead；SR1101	STN		+			-						135	70	1.5	1250	+			-						120	60	1.1	1500
		Zhang Chunhua	2024-10-15	Female	45	Meige	2	Shanghai	2024-09-09	Meige, bilateral eyelid spasm	-	No	No	Level 3	13916159162	No	No	No	Pingchi.1200-40 Lead；SR1101	STN		+			-						140	80	1.8	1022	+			-						140	80	1.8	1493
		Mao Xiaoming	2024-10-16	Male	42	PD	5	Shanghai	2024-09-12	-	Eight touch points	Yes	Yes	Level 1	13564340676	2025-09-12	Medoba 1/2-1/4-1/2-1/4, Xi Ning 1/2-1/2-1/2-1/2, Senforo (0.25mg) 1-1-1, Resa Gilan 1-0-0, amantadine 1-1-1, Vitaminb6 1-1-1-1, diphenhydroxysol 1/2-1/2-1/2-1/2	Medoba1/4-1/4-1/4-1/4，	Jing Yu1202-S Lead；SR1101-16	STN		+				-					130	60	1		+				-					130	60	1.2
		Bu Rongdi	2024-10-16	Female	60	PD	8	Shanghai	2023-10-12	Trembling in the right lower limb, slow, medication effect (3h)	PET	Yes	Yes	Level 1	13564105876	2025-10-12	Medoba 1/2-1/2-1/2-1/2	Medoba1/2-1/2-1/2-1/2	Pingchi.1200-40 Lead；SR1101	STN		+			-						130	70	2.35mA	1214	+			-						130	70	2.3mA	1110
		Zhang Xianjuan	2024-10-16	Female	72	PD	7	Shanghai	2024-09-12	Freezing, slow, stiffness	PET	Yes	Yes	Level 1	13381990351	2025-09-12	Medoba 1/2-1/2-1/2, Daringfu 1/2-1/2-1/2, Vitaminb6 1-1-1, Senforo (0.25mg) 1-1-1, Resa Gilan 1-0-0, amantadine 1/2-1/2-0	Medoba1/4-1/4-1/4，Vitaminb6 1-1-1，Senforo（0.25mg）1-1-1，Resa Gilan1-0-0，amantadine1/2-1/2-0	Medtronic, 3389S, RC	STN		+		-							130	60	1.1	NA	+		-							130	60	1.4	NA
		Zhang Xiaoyun	2024-10-16	Male	50	PD	13	Shanghai	2021-11-04	-	Genetics, PET, annual follow-up	No	Yes	Level 1	18117102211	2025-11-04	Medoba 1/4-1/4-1/4, Teshuda 0-1-0, Wuling Capsules 1-1-1	Clonazepam0-0-0-1/4，Slaiglan1-0-0	Pingchi.1200-40 Lead；SR1101	STN		+		-							125	60	2.5	829	+		-							125	60	2.4	1068	Dizziness and blurred vision (hypotension)
		Zhang Xiaoyun	2024-10-16	Male	50	PD	13	Shanghai	2021-11-04	-	Genetics, PET, annual follow-up	No	Yes	Level 1	18117102211	2025-11-04	Medoba 1/4-1/4-1/4, Teshuda 0-1-0, Wuling Capsules 1-1-1	Clonazepam0-0-0-1/4，Slaiglan1-0-0	Pingchi.1200-40 Lead；SR1101	STN		+			-						125	60	1.85	814	+			-						125	60	1.85	1021	Dizziness and blurred vision (hypotension)
		Chen Yinhua	2024-10-16	Female	71	ET	12	Wujiang	2023-07-06	-	Genetics, PET, annual follow-up	No	No	Level 1	13913088148	2025-10-26	Clonazepam (0.5mg) 0-0-0-1	Clonazepam（0.5mg）0-0-0-1	Medtronic, 3389S, RC	VIM-PSA		+			-						215	90	2.15V	1016	+			-						215	90	2.35V	932
		Zhang Guilin	2024-10-21	Male	71	PD	7	Jiangsu	2024-08-29	Freezing, end of the dose, stiffness	Freezing, wearing off	Yes	Yes	Level 1	13773504062	2025-08-29	Medoba1/2-1/2-1/2-1/2, Resa Gilan1-0-0, Daringfu1-1-1, Vitaminb61-1-1	Medoba1/2-1/2-1/2-1/2，Resa Gilan1-0-0，Daringfu0-0-0-1，Vitaminb61-1-1，Clozapine0-0-0-1/4	jingyu1200-40 Lead；SR1101	STN		+				-					130	60	1.2	1.55	+			-						130	60	1.4	1.5
		Zhang Xuehua	2024-10-22	Female	74	PD	16	Shanghai	2024-09-14	Slow, stiff	-	Yes	No	Level 2	18917873286	No	Medoba1-1-1, Xi Ning (India 200mg+50mg)1-1-1, Quetiapine (37.5mg)0-0-0-1, Clonazepam (1.5mg)0-0-0-1, Paroxetine (20mg)1-0-0	Medoba1-1-1，Quetiapine（25mg）0-0-0-1，Clonazepam1mg qN，Paroxetine（20mg）1-0-0	Pingchi.1200-40 Lead；SR1101	STN		+	-								115	70	1.3	NA	+	-								115	70	1.4	NA
		Xu Fawang	2024-10-23	Male	70	PD	10	chekiang	2024-09-20	Slow	-	Yes	No	Level 2	15727946105	No	Medoba3/4-3/4-3/4, Prapexor (0.25mg)2-2-2, Kedan1-1-1	Medoba1/2-1/2-1/2，Prapexor（0.25mg）2-2-2	Medtronic, 3389S, RC	STN		+		-							130	60	1.2	1424	+			-						130	60	1.2	1663
		Yin Yuzhen	2024-10-24	Female	69	PD	7	Anhui	2021-10-21	Whole body pain, stiffness when the medication has not taken effect, medication lasts for half an hour, speaking softly, more noticeable in the afternoon, eyes can't open, walking with support hurts, head tilts to the left, feels stiff on the right side	Psychiatric symptoms, FDG PET, annual follow-up	Yes	Yes	Level 1	18005572005	2025-10-21	Medoba1/2-1/2-1/2-1/2, Prapexor (0.25mg)1-0-1, Sertraline1-0-0	Medoba1/2-1/2-1/2-1/2，Prapexor（0.25mg）1-0-1，㑭ᥒ᧷1-0-0	Pingchi.1200-40 Lead；SR1101	STN		+			-						140	70	3	1447	+		-							140	70	3	933	After programming with the second ventral contact point, psychiatric symptoms were obvious, right-sided abnormal movement was obvious, and the left STN was adjusted to the sub-dorsal side
		Yang Quan	2024-10-28	Male	47	Dystonia	5 months	Anhui	2024-09-02	Torticollis, dystonia	-	No	No	Level 3	13856720865	No	diphenhydroxysol 0-2-2, Clonazepam0-0-1	diphenhydroxysol 0-2-2，risperidone0-0-0-1/2	Pingchi.1200-40 Lead；SR1101	STN		+				-					140	60	1.6mA	1354	+				-					140	60	1.8mA	1624
		Yang Quan	2024-10-28	Male	47	Dystonia	5 months	Anhui	2024-09-02	Torticollis, dystonia	-	No	No	Level 3	13856720865	No	diphenhydroxysol 0-2-2, Clonazepam0-0-1	diphenhydroxysol 0-2-2，risperidone0-0-0-1/2	Pingchi.1200-40 Lead；SR1101	STN				-							140	60	1.1mA	1631			-							140	60	1.2mA	1151
		Yin Jinfa	2024-10-28	Male	72	PD	10	chekiang	2024-09-19	Tremor, slow, stiff	-	Yes	Yes	Level 1	13732590008	2025-09-19	Medoba1/2-1/2-1/2, Xi Ning1/2-1/2-1/2, Slaiglan1-1-0, amantadine1-1-0, Clozapine0-0-1/4, Vitaminb6 1-1-1	Medoba1/2-1/2-1/2，Xi Ning0-0-0-1/4，Slaiglan1-1-0，amantadine1-1-0，Clozapine0-0-1/4	Pingchi.1200-40 Lead；SR1101	STN		+			-						130	60	1.5	1213	+		-							130	60	1	1777
		Zhu Huowang	2024-10-29	Male	71	PD	16	Jiangxi	2024-09-24	Stiffness, torticollis, did not pass the challenge test, PET	-	Yes	Yes	Level 1	13564339555	2025-09-24	Medoba1-1-1-1, diphenhydroxysol 1/2-0-1/2, Xi Ning1-1-1-1, midopy1-1-0, amantadine1-0-1, Senforo (0.75mg)1-0-0-1, Clozapine1/4-1/4-0-1/2, Baclofen1-1-1	Medoba3/4tabletsqid，diphenhydroxysol 1/2-0-1/2，midopy1-1-0，amantadine1-1-0，Senforo（0.75mg）1-0-0-1，Clozapine1/4-0-3/4，Baclofen1-1-1	Medtronic, 3389S, RC	STN						-					125	70	2	NA					-					125	70	1.8	NA	With higher parameters, the neck can be straightened
		Zhu Huowang	2024-10-29	Male	71	PD	16	Jiangxi	2024-09-24	Stiff, torticollis, failed impact test, PET	-	Yes	Yes	Level 1	13564339555	2025-09-24	Medoba1-1-1-1, diphenhydroxysol 1/2-0-1/2, Xi Ning1-1-1-1, midopy1-1-0, amantadine1-0-1, Senforo (0.75mg)1-0-0-1, Clozapine1/4-1/4-0-1/2, Baclofen1-1-1	Medoba3/4tabletsqid，diphenhydroxysol 1/2-0-1/2，midopy1-1-0，amantadine1-1-0，Senforo（0.75mg）1-0-0-1，Clozapine1/4-0-3/4，Baclofen1-1-1	Medtronic, 3389S, RC	STN				-							125	70	1.4	NA			-							125	70	1.2	NA	With higher parameters, the neck can be straightened
		Qiu Liying	2024-10-31	Female	50	PD	9	Hainan	2024-09-23	Tremor, slow, stiff, freezing	Freezing	Yes	No	Level 2	13698978672	No	Medoba1/2-1/2-0, Silem0-1/2-0, Xi Ning0-0-1/2, diphenhydroxysol 0-0-1/2	Medoba1/2-1/2-0，Xi Ning0-0-1/2	Pingchi.1200-40 Lead；SR1101	STN		+			-						130	70	1.5mA	NA	+			-						130	70	1.3mA	NA
		Yellow satellite	2024-10-30	Male	66	PD	6	Shanghai	2023-10-26	Tremor, stiff	PPC, annual follow-up, PET	Yes	Yes	Level 1	13611689533	2025-10-26	Medoba1/4-1/4-1/4	Medoba1/4-1/4-1/4	Medtronic, 3389S, RC	STN		+			-						150	70	2.4mA		+		-							150	80	2.4mA
		Chen Meiju	2024-11-05	Female	68	PD	4	chekiang	2024-09-25	Tremor, abnormal movement	Eight touch points	Yes	No	Level 2	13456981418	No	Medoba3/4-3/4-3/4, Kedan1-1-1, Senforo (0.25mg)2-2-2	Medoba1/2-1/2-1/2	Jing Yu1202-S Lead；SR1101-16	STN		+					-				130	70	1.5		+					-				130	70	1.3
		Li Shuling	2024-11-05	Female	63	PD	9	Anhui	2024-09-25	Freezing, on-off, abnormal movement	-	Yes	Yes	Level 1	17756199911	2025-09-25	Medoba3/4-3/4-3/4, Xi Ning1/2-0-1/2, Teshuda1-0-1, Resa Gilan1-0-0, diphenhydroxysol 1/2-1-1/2, amantadine3/2-3/2-1, Vitaminb6 1-1-1	Medoba1/2-1/2-1/2，Resa Gilan1-0-0，diphenhydroxysol 1/2-1-1/2，amantadine1-1-1，Vitaminb6 1-1-1	jingyu1200-40 Lead；SR1101	STN		+			-						110	60	1.2		+			-						110	60	1.2
		Xu Xu was summoned	2024-11-05	Female	54	ET	50	Anhui	2024-09-29	Tremor	Eight touch points	No	No	Level 3	15052948291	No	Piracetam (2mg) 0-0-0-1, Depakine (0.5g) 1/2-1/4-1/2, Clonazepam (0.5mg) 0-0-0-1/2	ځıၵந（2mg）0-0-0-1，ሗၔ䐱（0.5g）1/2-1/4-1/2，Clonazepam（0.5mg）0-0-0-1/2	Jing Yu1202-S Lead；SR1101-16	VIM-PSA		+			-						130	60	1.3		+		-							130	60	1.8
		Sheng Guoliang	2024-11-06	Male	66	PD	12	chekiang	2024-09-26	Slow	Eight touch points	Yes	Yes	Level 1	13968135582	2025-09-26	Medoba1/2-1/2-1/2-1/2, Xi Ning1/2-1/2-1/2-1/2, Teshuda1-1-1, Daringfu0-0-0-1	Medoba1/2-1/2-1/2	Jing Yu1202-S Lead；SR1101-16	STN		+			-						60	50	1.2		+			-						60	50	1.15
		Sheng Guoliang	2024-11-06	Male	66	PD	12	chekiang	2024-09-26	Slow	Eight touch points	Yes	Yes	Level 1	13968135582	2025-09-26	Medoba1/2-1/2-1/2-1/2, Xi Ning1/2-1/2-1/2-1/2, Teshuda1-1-1, Daringfu0-0-0-1	Medoba1/2-1/2-1/2	Jing Yu1202-S Lead；SR1101-16	STN		+					-				105	60	1.5		+					-				95	60	1.5
		Yu Xiufang	2024-11-07	Female	72	PD	10	Jiangsu	2024-09-29	Slow, stiff, freezing, abnormal movement	-	Yes	Yes	Level 1	18217099078	2025-05-29	Medoba3/4-3/4-3/4, Prapexor (0.25mg) 1-1-1, diphenhydroxysol 1/2-0-0, Vitaminb6 1-1-1, Clozapine1/2-0-1/2	Medoba1/2tabletstid，diphenhydroxysol 1/2-0-0，Vitaminb6 1-1-1，Clozapine1/2tabletsqN	jingyu1200-40 Lead；SR1101	STN		+				-					110	70	2.2		+			-						105	60	1.7
		Zheng Yuanzhao	2024-11-11	Male	71	ET	30	chekiang	2024-09-27	Tremor in left limb	Eight touch points	No	No	Level 3	13738030652	No	No	No	Jing Yu1202-S Lead；SR1101-16	VIM-PSA		+						-			130	70	1		C+						-			130	70	1.2		0-3 off, 3-24 on
		Luo Xuefeng	2024-11-13	Male	60	PD	8	Yunnan	2023-11-16	Pain in shoulder, neck, and foot, related to drug effect	Annual follow-up, trunk pain	Yes	Yes	Level 1	18908729190	2025-11-16	Medoba1/2-1/2-1/2-1/2, Prapexor (0.25mg) 1-1-1-1, Vitaminb6 1-1-1-1, Clozapine 0-0-0-1/2	Medoba1/2-1/2-1/2-1/2，Prapexor（0.25mg）1-1-1-1，Vitaminb61-1-1-1，Clozapine0-0-0-1/2	Pingchi.1200-40 Lead；SR1101	STN		+		-							130	70	2.65	876	+		-							130	70	2.25	859
		Ma Ying	2024-11-07	Female	58	PD	15	Gansu	2021-04-01	Abnormal movement, tremor 2-3 hours after taking medication	Annual follow-up, PET	No	No	Level 3	13919650078	2025-04-01	Xi Ning1/2-1/4-1/4, Clozapine 0-0-0-1/4	Xi Ning1/2-1/4-1/4，Clozapine0-0-0-1/4	Pingchi.1200-40 Lead；SR1101	STN	Double negative	C+	-	-							75	60	2.3	834	C+		-							75	70	2.3	952
		Ma Ying	2024-11-07	Female	58	PD	15	Gansu	2021-04-01	Abnormal movement, tremor 2-3 hours after taking medication	Annual follow-up, PET	No	No	Level 3	13919650078	2025-04-01	Xi Ning1/2-1/4-1/4, Clozapine 0-0-0-1/4	Xi Ning1/2-1/4-1/4，Clozapine0-0-0-1/4	Pingchi.1200-40 Lead；SR1101	STN	Double negative	C+		-		-					75	90	2.8	707	C+		-	-						75	60	2.4	760
		Xu is strong	2024-11-07	Male	47	PD	10	chekiang	2022-10-26	Pain in right arm, stiffness (unable to move), drooling, unable to speak	Annual follow-up, abnormal movement and dystonia	No	Yes	Level 1	15858922686	2025-10-26	Medoba1/2-1/2-1/2, Teshuda1-1-1, amantadine1-1	Medoba1/4tabletsqid，Teshuda1tabletsbid，amantadine1tabletstid，Clozapine1/2tabletsqN，	Pingchi.1200-40 Lead；SR1101	STN				+	-						170	60	0.95	738			-	+						170	50	1.3	987
		Xu is strong	2024-11-07	Male	47	PD	10	chekiang	2022-10-26	Pain in right arm, stiffness (unable to move), drooling, unable to speak	Annual follow-up, abnormal movement and dystonia	No	Yes	Level 1	15858922686	2025-10-26	Medoba1/2-1/2-1/2, Teshuda1-1-1, amantadine1-1	Medoba1/4tabletsqid，Teshuda1tabletsbid，amantadine1tabletstid，Clozapine1/2tabletsqN，	Pingchi.1200-40 Lead；SR1101	STN						-					170	80	2.85	786					-					170	80	3.2	849
		Lu Haibin	2024-11-13	Male	65	PD	15	Fujian	2020-11-02	Unstable, unable to walk	Annual follow-up	No	Yes	Level 1	13459781131	2025-11-02	Medoba1/2-1/2-1/2, amantadine1-1-0, Clonazepam 0-0-0-1/4	Medopa 1/2tabletstid	Medtronic, 3389S, RC	STN		+		-							115	60	2.55	1094	+	-								115	60	3.2	816
		Lu Haibin	2024-11-13	Male	65	PD	15	Fujian	2020-11-02	Unstable, unable to walk	Annual follow-up	No	Yes	Level 1	13459781131	2025-11-02	Medoba1/2-1/2-1/2, amantadine1-1-0, Clonazepam 0-0-0-1/4	Medopa 1/2tabletstid	Medtronic, 3389S, RC	STN		+				-					115	60	2.5	960	+			-						115	70	3.1	794
		Yan Chuanfeng	2024-11-18	Female	51	PD	5	Jiangsu	2024-10-12	Slow stiffness	PPC	Yes	No	Level 2	13852645231	No	Xi Ning1-1-1, Medoba1/2-1/2-1/2, Prapexor (0.25mg) 1-1-1, amantadine1-1-0	Medoba1/2-1/2-1/2，Prapexor（0.25mg）1-1-0	Medtronic, 3389S, RC	STN		+			-						130	60	1mA	1452	+			-						60	130	1mA	1763	Missing one scale score
		Li Jiuzhen	2024-11-18	Female	70	Meige	7	chekiang	2024-10-16	Difficulty opening eyes	-	No	No	Level 3	13819350011	No	No	No	Medtronic, 3389S, RC	STN		+			-						130	60	1	1435	+			-						130	60	1	1418
		Zhou Weiming	2024-11-18	Male	57	PD	5	Jiangsu	2024-10-11	Slow, stiff, mild abnormal movement	Dyskinesia	Yes	No	Level 2	18351966324	No	Medoba1/2-1/2-1/2, Silem1-1-1	Medoba1/2-1/2-1/2	Pingchi.1200-40 Lead；SR1101	STN		+			-						130	60	1.4	1100	+			-						130	60	1	1575
		Zheng Jie	2024-11-18	Female	61	PD	12	Shanghai	2024-10-08	Tremor, abnormal movement	Dyskinesia	Yes	Yes	Level 1	13764457210	2025-10-08	Medoba1/2-1/2-1/2, Xi Ning1/2-1/2-1/2, Slaiglan1-1-0, Prapexor (0.25mg) 0-0-1, amantadine1-1-1/2, Clozapine 0-0-0-1/2, Donepezil (5mg) 0-0-0-1, Vitaminb6 1-1-1	Medoba1/2-1/2-1/2，Slaiglan1-1-0，amantadine1/2-1/2-0，Donepezil（5mg）0-0-0-1，Vitaminb6 1-1-1	jingyu1200-40 Lead；SR1101	STN		+				-					130	60	1	1.39	+			-						130	60	1.2	1.16
		Chen Qun	2024-11-19	Female	52	Meige	1	Guizhou	2024-10-14	-	Eight touch points	No	No	Level 3	18076037226	No	Baclofen1-1-1, Clonazepam 0-0-0-1/2	Baclofen1-1-1，Clonazepam0-0-0-1/2	Jing Yu1202-S Lead；SR1101-16	STN		+				-					130	60	1.2		+				-					130	60	1.2
		Xu Cuifang	2024-11-19	Female	65	PD	6	Jiangsu	2024-10-16	Tremor, slowness, rigidity	-	Yes	Yes	Level 1	13375235539	2025-10-16	Medoba1/2-1/2-1/2-1/2, Xi Ning 0-0-0-1/2	Medoba1/2-1/2-1/2	Pingchi.1200-40 Lead；SR1101	STN		+		-							130	60	1.9	1023	+			-						130	60	2.1	904
		Feng Yanqi	2024-11-19	Male	43	PD	7	Shanghai	2024-10-15	On-off, abnormal movement, freezing	-	Yes	Yes	Level 1	13761943661	2025-10-15	Medoba1/2-1/2-1/2-1/2-1/2, diphenhydroxysol 1/2-1/2-1/2, Rothigottin (6mg) 0-0-0-1, amantadine1-1-0	Medoba1/2-1/2-1/2tid，diphenhydroxysol 1/2 tid，Rothigottin 6mg qd，amantadine1-1-0	Medtronic, 3389S, RC	STN		+			-						130	60	1.0mA	NA	+			-						130	60	1.3mA	NA
		Wang Meihui	2024-11-19	Male	66	PD	9	Jiangsu	2024-10-15	On-off, tremor, slow, stiff, end of the dose	Wearing off	Yes	Yes	Level 1	13375235539	2025-10-15	Medoba3/4-3/4-3/4-3/4, Teshuda1-0-1, Xi Ning 0-0-0-1/2	Medoba1/2-1/2-1/2	Pingchi.1200-40 Lead；SR1101	STN		+		-							130	60	1.5	1637	+		-							130	60	1.5	1611
		Guo Xingfang	2024-11-20	Female	56	ET	10	chekiang	2024-10-11	Trembling hands	-	No	No	Level 3	13758964168	No	No	No	Pingchi.1200-40 Lead；SR1101	VIM-PSA		+	-								130	70	1.85	964	+	-								130	70	1.45	1089
		Ling Yunqi	2024-11-25	Female	62	ET	10	Shanghai	2024-10-17	Tremor	-	Yes	Yes	Level 1	13501771140	2025-10-17	No	No	Jing Yu1202-S Lead；SR1101-16	VIM-PSA		+		-							180	70	3.2		+			-						180	70	2.5		Please have the patient turn off the device at night and turn it on by themselves during the day
		Mei Yunhua	2024-11-27	Female	73	PD	14	chekiang	2024-10-24	Tremor, stiff, freezing	Freezing	Yes	No	Level 2	18368683256	No	Medoba 5 to 6 times a day, each time 1/2 to 3/4, Prapexor (0.25mg) 3-3-3	Medoba1/2tabletstid，Prapexor（0.25mg）1tabletstid	Pingchi.1200-40 Lead；SR1101	STN		+			-						130	60	2.2	1280	+			-						130	60	1.5	1515
		Chen Linhua	2024-11-20	Male	54	PD	11	chekiang	2023-11-07	-	Annual follow-up	Yes	Yes	Level 1	13858665668	2025-11-07	Medoba1/2-1/2-1/2, amantadine1-1-0, Daringfu 0-0-0-1	Medoba1/2-1/2-1/2	jingyu1200-40 Lead；SR1101	STN	monopole	C+				-					140	60	3		+				-					130	60	2.1
		Chen Linhua	2024-11-20	Male	54	PD	11	chekiang	2023-11-07	-	Annual follow-up	Yes	Yes	Level 1	13858665668	2025-11-07	Medoba1/2-1/2-1/2, amantadine1-1-0, Daringfu 0-0-0-1	Medoba1/2-1/2-1/2	jingyu1200-40 Lead；SR1101	STN	monopole	C+			-						140	60	1		C+		-							130	50	1.3
		Shi Jianguo	2024-11-20	Male	55	PD	9	Jiangsu	2023-11-09	-	Annual follow-up	Yes	Yes	Level 1	13921516193	2025-11-09	Medoba1/4-1/4-0, Xi Ning 0-0-0-1/2, Senforo (0.25mg) 0-0-0-1/2	Medoba1/4-1/4-0，Xi Ning0-0-0-1/2，Senforo（0.25mg）0-0-0-1/2	Pingchi.1200-40 Lead；SR1101	STN		+		-							150	70	1.85mA	1277	+		-							150	50	2.1mA	1122
		Shi Jianguo	2024-11-20	Male	55	PD	9	Jiangsu	2023-11-09	-	Annual follow-up	Yes	Yes	Level 1	13921516193	2025-11-09	Medoba1/4-1/4-0, Xi Ning 0-0-0-1/2, Senforo (0.25mg) 0-0-0-1/2	Medoba1/4-1/4-0，Xi Ning0-0-0-1/2，Senforo（0.25mg）0-0-0-1/2	Pingchi.1200-40 Lead；SR1101	STN		+				-					150	70	1.1mA	1252	+				-					150	60	2.0mA	1130
		Zhou Yongping	2024-11-27	Female	58	PD	21	chekiang	2023-11-28	-	Annual follow-up	Yes	Yes	Level 1	15869335174	2025-11-28	Medoba1/4-1/4-1/4	Medoba1/4-1/4-1/4	Medtronic, 3389S, RC	STN		+				-					110	60	1.3	1644(0.8mA)	+				-					110	60	1.4	1686（0.8mA）
		Zhu Suqin	2024-11-28	Female	65	ET	20	chekiang	2019-10-08	After shutdown in 2023, difficulty in articulation has been reduced, abnormal gait, improved walking difficulty, able to walk independently, severe pain in upper limbs and neck has been significantly reduced, tremor has worsened but does not affect daily life	Postoperative issues of DBS (Xuanwu surgery); DAT, FDG, TAU	No	No	Level 1	15668986989	2025-10-08	No	No	Medtronic, 3389S, RC	VIM-PSA			-	+							200	60	2			-	+							200	60	2		Xuanwu Hospital surgery, this admission is for removal of electrodes and stimulator
		Yao Jihui	2024-11-26	Male	75	PD	12	Shanghai	2024-10-18	Frequent falls, slow movement	-	Yes	No	Level 2	13817367602	No	Medoba3/4-1/2-1/2, Prapexor (0.25mg) 1-1-1, amantadine1-1-0, Ntakapong1/2-1/2-1/2, Stuck Zuodopa 1-0-1	Medoba1/2-1/2-1/2，Prapexor（0.25mg）1/2-1/2-1/2，amantadine1--1-0	Pingchi.1200-40 Lead；SR1101	STN		+			-						130	60	1.0mA	NA	+			-						130	60	1.0mA	NA
		Chen Lanying	2024-12-03	Female	62	Meige	3	Anhui	2024-10-23	Difficulty opening eyes	-	No	No	Level 2	13866895692	No	No	No	Pingchi.1200-40 Lead；SR1101	STN		+			-						130	60	1.8	1485	+				-					130	60	2	1691
		Gaoguang Road	2024-12-04	Male	49	PD	6	Shanghai	2024-10-29	No	Directional electrode	Yes	Yes	Level 1	13122197118	2025-10-29	Medoba1/2-1/2-1/2-1/2, amantadine1-1-0-0, Prapexor (0.25mg) 1-0-0-1, Slaiglan1-1-0-0	Medoba1/4-1/4-1/4，amantadine1-1-0-0，Prapexor（0.25mg）1-0-0-1，Slaiglan1-1-0-0	Medtronic，B33005,B34000,37612(Rechargeable RC)	STN		+		1a-							130	60	1.1	3105	+		9b-							130	60	1.2	3664
		Willow warbler	2024-12-04	Female	61	PD	12	chekiang	2024-10-30	Right leg tremor, weakness, dizziness	Directional electrode	Yes	No	Level 2	13586152727	No	Medoba1/2-1/2-1/2-1/2, Xi Ning1/2-1/2-1/2-1/2, Prapexor (0.25mg) 1-1-1-1, Vitaminb6 1-1-1-1	Medoba1/4 tid，Prapexor（0.25mg）1/2 tid，Vitaminb6 1 tid	Medtronic，B33005,B34000,37612(Rechargeable RC)	STN	Double negative	C+		1c-	2b-						160	60	1.75	2425	C+		9-							160	60	1.5	1975	Left electrode 1.5mm anterior
		Zhu Chunnu	2024-12-05	Female	55	PD	6	chekiang	2024-10-25	-	-	Yes	No	Level 2	18248570478	No	Medoba3/4-3/4-3/4, Xi Ning1/2-1/2-1/2-1/2, amantadine1-0-0, Prapexor (0.25mg) 1-1-1	Medoba1/2 tid，Prapexor（0.25mg）1-1-1	Pingchi.1200-40 Lead；SR1101	STN		+		-							130	60	0.3mA	NA	+		-							130	60	1.65mA	NA
		Shen Yulan	2024-12-05	Female	64	PD	8	Shanghai	2024-10-24	-	-	Yes	No	Level 2	13601808657	No	Medoba1/2-1/2-1/2-1/2, Xi Ning1/2-1/2-1/2-1/2, Vitaminb6 1-1-1-1, Teshuda1-1-1-0, Clonazepam0-0-0-3/4	Medoba1/2-1/2-1/2，Vitaminb6 1-1-1，Teshuda1-1-1，Clonazepam0-0-3/4	Pingchi.1200-40 Lead；SR1101	STN		+			-						125	60	1.1mA	NA	+		-							125	70	2mA	NA
		Fan Huiqin	2024-12-05	Female	66	PD	9	Shanghai	2024-10-30	Tremor, slow, stiff, freezing, hallucination	Freezing, hallucination	Yes	No	Level 2	18018522320	No	Medoba3/4-3/4-3/4, Kedan1/2-1/2-1/2, Xi Ning0-0-1, olanzapine1-0-1, lorazepam0-0-1	Medoba1/2 tid, CNZ 1/4tabletsqN	Medtronic, 3389S, RC	STN		+			-						130	60	1.1		+			-						130	60	1
		Cai Suqin	2024-12-10	Female	70	NIID	1	Jiangsu	2024-11-15	Trembling in both legs while standing	Gene, Tremor	Yes	Yes	Level 1	18601734208	2025-11-15	No	No	Pingchi.1200-40 Lead；SR1101	VIM-PSA		+	-								185	60	2.65	1028	+	-								185	70	3	1101
		Yang Changhai	2024-12-10	Male	65	PD	7	Hunan	2024-10-31	Difficulty swallowing	Dysphagia (Cervical dystonia?)	Yes	Yes	Level 1	15626000896	2025-10-31	Medoba1/4-1/2-1/4-1/2, Xi Ning1/2-1/2-1/2-1/2, Senforo (0.25mg) 1-1-1-1, Resa Gilan1-0-0-0, amantadine1-1-0-0	Medoba1/4 qid，䐱₏⍗㍚ 1-1-0，Resa Gilan1-0-0，Senforo1-1-1	Pingchi.1200-40 Lead；SR1101	STN					-	+					130	60	1.2	2020				-	+					130	60	1.5	1748
		Zhuang Mei	2024-12-11	Female	62	PD	10	Jiangsu	2024-11-08	-	Directional electrode	Yes	No	Level 2	13862782028	No	Medoba1/2-1/2-1/2, Xi Ning1/2-1/2-1/2, Slaiglan1-0-0, amantadine1-1-1, Prapexor (0.375mg) 1-1-0	Medoba1/4-1/4-1/4，Slaiglan1-0-0，amantadine1-1-1，Prapexor（0.375mg）1-1-0	Medtronic，B33005,B34000,37612(Rechargeable RC)	STN		+			2c-						130	60	1.2	3525	+		9c-							130	60	0.6	高	Abnormal movement is obvious
		Chen Guifang	2024-12-11	Female	68	PD	13	Shanghai	2024-11-04	Balance slow, stiff	Directional electrode	Yes	No	Level 2	13472807808	No	Medoba1/2-1/2-1/2, Xi Ning1/2-1/2-0-1/2, Slaiglan1-0-0, amantadine1/2-0-0, Vitaminb6 1-1-1	Medopa1/4tabletstid	Medtronic，B33005,B34000,37612(Rechargeable RC)	STN		+			-						130	60	1	2692	+			-						130	60	0.8	2213
		Wang Zhirong	2024-12-12	Male	77	PD	8	Jiangsu	2024-11-06	Unable to open both eyes, tremor, slow, stiff	-	Yes	Yes	Level 1	15901058099	2025-11-06	Medoba1-1-1, Senforo (0.25mg) 1-1-1, Vitaminb6 1-1-1	Medopa1/2tabletstid，B6 1tabletsbid	Medtronic, 3389S, RC	STN		+		-							130	60	1.2	1501	+		-							130	60	1.1	1652
		Pan Yesheng	2024-12-12	Male	43	PD	6	Guangdong	2024-11-04	End of the dose, abnormal movement, freezing	End of dose, Abnormal movement, Freezing	Yes	No	Level 2	13818235992	No	Medoba1/2-1/2-1/2, Prapexor (0.25mg) 5/2-5/2-5/2, amantadine1-1-0, Vitaminb6 1-1-0, Slaiglan1-1-0, Ntakapong1/2-0-1/2	Prapexor1-1-1，Medoba1/4-1/4-1/4，amantadine1-1-0，Vitaminb6 1-1-1	jingyu1200-40 Lead；SR1101	STN		+				-					130	60	1.3	1.46	+			-						130	60	1.75	1.19
		Wang Yuehua	2024-12-12	Female	57	Meige	5	Fujian	2024-11-04	-	-	Yes	No	Level 2	15080066866	No	No	No	jingyu1200-40 Lead；SR1101	STN		+				-					130	60	2	1.35	+				-					130	60	1.9	1.19
		Qin Cuihong	2024-12-05	Female	54	GBA	8	Jiangsu	2021-11-29	Difficulty speaking, labored breathing, disorientation at night, left toe gripping	FDG PET, DBS annual follow-up	No	Yes	Level 1	18086761537	2025-11-29	Medoba 1/4-1/4-1/4-1/4, Vitamin B6 1-0-1	Medoba1/4-1/4-1/4-1/4，Vitaminb6 1-0-1	Pingchi.1200-40 Lead；SR1101	STN		+		-							130	60	2.35mA	1256	+		-							130	70	3.15mA	837
		Qin Cuihong	2024-12-05	Female	54	GBA	8	Jiangsu	2021-11-29	Difficulty speaking, labored breathing, disorientation at night, left toe gripping	FDG PET, DBS annual follow-up	No	Yes	Level 1	18086761537	2025-11-29	Medoba 1/4-1/4-1/4-1/4, Vitamin B6 1-0-1	Medoba1/4-1/4-1/4-1/4，Vitaminb6 1-0-1	Pingchi.1200-40 Lead；SR1101	STN		+			-						130	70	2.90mA	1186	+			-						130	60	2.65mA	885
		Chen Biqing	2024-12-12	Male	66	PD	16	Shanghai	2023-12-18	Left side body jaw trembling, voice low, sensation of a lump in the throat	Annual follow-up	Yes	Yes	Level 1	15821778369	2025-12-18	Medoba 1/2-1/2-1/2	Medoba1/2-1/2-1/2	jingyu1200-40 Lead；SR1101	STN		+		-							155	90	2.4mA		+		-							135	60	2.6mA
		Zhang Haili	2024-12-11	Female	37	肌张力障碍	6	chekiang	2023-11-03	Abnormal walking posture of the right lower limb	Hospital programming	Yes	No	Level 2	13905789428	No	No	No	Pingchi.1200-40 Lead；SR1101	Gpi		+	-								150	60	3	1195	+	-								150	60	3.0v	1139
		Zhang Haili	2024-12-11	Female	37	肌张力障碍	6	chekiang	2023-11-03	Abnormal walking posture of the right lower limb	Hospital programming	Yes	No	Level 2	13905789428	No	No	No	Pingchi.1200-40 Lead；SR1101	Gpi		+		-							150	60	1.7	1456
		Wei Liangju	2024-12-17	Female	61	PD	14	Anhui	2024-11-08	Tremor, slow, stiff	-	Yes	Yes	Level 1	13866197757	2025-11-08	Medoba 1/2-1/2-1/2-1/2-1/2, Xi Ning 1/2-0-1/2-1/2-1/2, Senforo (0.25mg) 0-1-1-1-0, Clozapine 0-0-1/2-0-1, Vitamin B6 1-0-0-0-0, amantadine 0-1-0-0-0, diphenhydroxysol 0-0-0-1-0	Medoba1/4tabletsqid，Senforo（0.25mg）1-0-1-1，Clozapine1/4-0-1/4-1/2，Vitaminb6 1tabletsqid，amantadine1-0-0-0，diphenhydroxysol 1/2tabletsbid	Pingchi.1200-40 Lead；SR1101	STN		+			-						130	60	0.8mA	NA	+			-						130	60	1.0mA	NA
		Huang Huamei	2024-12-18	Female	67	PD	7	chekiang	2024-11-14	Slow, stiff	Directional electrode	Yes	No	Level 2	13356122699	No	Medoba 1/4-1/4-1/4, Daringfu 1-1-1, Prapexor (0.25mg) 1-1-1	Medoba1/4-1/4-1/4，Prapexor 0.25mg tid	Medtronic，B33005,B34000,37612(Rechargeable RC)	STN	monopole	C+			2-						130	60	1.7v		C+			10-						130	60	1.7v
		Chen Jinfen	2024-12-24	Female	60	PD	9	Jiangsu	2024-11-12	Slow, stiff, end of the dose, abnormal movement, on-off	End of dose, Abnormal movement, On-off	Yes	Yes	Level 1	13372253377	2025-11-12	Medoba 1/2-1/2-1/2-1/2, Prapexor (0.75mg) 1-0-1, amantadine 3/2-3/2-1, diphenhydroxysol 1/2-1/2-1/2-1/2, Vitamin B6 1-1-1-1, Clozapine 1/2-1/2-3/4	Medoba1/4 qid，Prapexor 0.75mg bid，diphenhydroxysol 1/2tabletsqid，Vitaminb6 1tabletsqid	jingyu1200-40 Lead；SR1101	STN		+			-						130	60	2.1		+			-						130	60	1.5
		Franklin Law	2024-12-24	Male	67	PD	8	chekiang	2024-11-18	Slow, stiff	-	Yes	No	Level 2	13216381722	No	Piribedil 1-0-1, Medoba 3/4-3/4-3/4, Vitamin B6 1-1-1, diphenhydroxysol 1/2-0-0	Piribedil1 qd，Medoba1/2tabletsbid	Medtronic, 3389S, RC	STN		+				-					130	60	0.9	NA	+				-					130	60	1.2	NA
		Li Xiaoming*	2024-12-24	Female	60	PD	18	Shanghai	2024-11-22	Slow, stiff	PPC	Yes	No	Level 2	13701701090	No	Medoba 1-1-1-3/4-1/2, amantadine 1-1-1, diphenhydroxysol 1-1-1, Xi Ning 0-0-0-0-1/2, Teshuda 1-1-1-0-0, Vitamin B6 1-1-0-0-0, Clonazepam 0-0-0-0-1/2	Medoba1/2tablets `Five times a day	Medtronic，3389S，PPC	STN		+			-						130	60	1.0mA		+			-						130	60	1.5mA		Left LFP 22.46Hz, right LFP 23.46Hz, patient from our hospital's noon medical department, extremely poor compliance, anxious
		Kim yinlan	2024-12-25	Female	57	PD	4	Shanghai	2024-11-22	Slow, difficulty walking	-	Yes	No	Level 2	13506609887	No	Medoba 1/2-1/2-1/2-1/2, Resa Gilan (take one tablet every 3 days)	Medoba1/2bid	Medtronic, 3389S, RC	STN		+			-						130	60	1.2	941	+			-						130	60	1.1	1808
		Sun Baoyu	2024-12-25	Female	54	PD	9	Jiangsu	2024-11-14	Abnormal movement, end of the dose, slow, stiff	-	Yes	Yes	Level 1	13905256302	2025-11-14	Medoba 3/4-3/4-3/4-3/4, Xi Ning 3/4-3/4-3/4-3/4, Vitamin B6 1-1-1-1, amantadine 1-1-1-0, Senforo (0.25mg) 3-3-3, Clozapine 1/2-1/2-1/2-1/2, Slaiglan 1-1-0	Medoba1/4-1/4-1/4-1/4，Slaiglan1-1-0，Senforo（0.25mg）1-1-1，Vitaminb6 1-1-1-1	Pingchi.1200-40 Lead；SR1101	STN		+			-						120	60	1.8	1352	+			-						120	70	2.6	757
		Fan Haifeng	2024-12-26	Male	48	PD	9	chekiang	2024-11-21	Slow, stiff	-	Yes	No	Level 2	13913133001	No	Medoba 1/2-1/2-1/2, Teshuda 0-1-0	Medoba1/2-1/2-1/2	Medtronic, 3389S, RC	STN		+			-						130	60	1	1817	+			-						130	60	1.2	1321
		Genghis Khan	2024-12-26	Male	68	PD	10	Anhui	2024-11-15	Slow, stiff, on-off, freezing	Eight-contact	Yes	No	Level 2	17721213010	No	Medoba1-1-1-1/2, Xi Ning1/2-1/2-1/2-1/2, Prapexor (0.25mg) 1-0-1, Teshuda 0-0-0-1, Clonazepam 0-0-0-1/2	Medoba1/2 qid，Prapexor（0.25mg）1tabletsbid，Clonazepam 1/2tabletsqN	Jing Yu1202-S Lead；SR1101-16	STN+SNR		+	-								30	60	2		+	-								30	60	2
		Genghis Khan	2024-12-26	Male	68	PD	10	Anhui	2024-11-15	Slow, stiff, on-off, freezing	Eight-contact	Yes	No	Level 2	17721213010	No	Medoba1-1-1-1/2, Xi Ning1/2-1/2-1/2-1/2, Prapexor (0.25mg) 1-0-1, Teshuda 0-0-0-1, Clonazepam 0-0-0-1/2	Medoba1/2 qid，Prapexor（0.25mg）1tabletsbid，Clonazepam 1/2tabletsqN	Jing Yu1202-S Lead；SR1101-16	STN+SNR		+				-					130	70	1.7		+				-					130	60	2.5
		Wei Tongshan	2024-12-18	Male	58	PD	9	Yunnan	2024-11-06	End of the dose, on-off, freezing, hallucination	-	Yes	No	Level 2	13908850751	No	Medoba1/2-1/2-3/4-1/2-1/2-1/4, amantadine1/2-0-0, Daringfu 0-1/2-0-1/2	Medoba1/2tabletstid	Pingchi.1200-40 Lead；SR1101	STN		+			-						130	60	1.9	1385	+			-						130	60	1.9	1078
		Lu Youxian	2024-12-26	Female	60	Meige	1	chekiang	2024-11-20	Blinking, pursing lips	Eight-contact	No	No	Level 3	13626879495	No	Clonazepam 0-0-0-1/2	Clonazepam0-0-0-1/2	Jing Yu1202-S Lead；SR1101-16	STN		+					-				130	60	1.4	1.08	+					-				130	60	1	1.23
		Zhu Xiuhe	2024-12-17	Female	64	Meige	2	chekiang	2024-11-07	Meige	-	No	No	Level 3	15168004921	No	No	No	jingyu1200-40 Lead；SR1101	STN		+				-					130	60	1.5		+				-					130	60	1.5
		Huang Shumao	2024-12-17	Male	57	Meige	2	Jiangsu	2024-11-11	Meige	-	No	No	Level 3	15189206858	No	No	No	jingyu1200-40 Lead；SR1101	STN		+				-					130	60	2.1		+				-					130	60	1.2
		Han Mugen	2024-12-18	Male	74	PD	6	chekiang	2023-04-06	Difficulty starting, turning, freezing	Hospital programming	Yes	Yes	Level 1	13758592251	2025-04-06	Medoba1/2-1/2-1/2-1/2, Xi Ning1/2-1/2-1/2-1/2	Medoba1/2-1/2-1/2-1/2，Xi Ning1/2-1/2-1/2-1/2	Medtronic, 3389S, RC	STN		C+		-							90	70	1.2	NA	C+		-							90	60	2.1	NA
		Han Mugen	2024-12-18	Male	74	PD	6	chekiang	2023-04-06	Difficulty starting, turning, freezing	Hospital programming	Yes	Yes	Level 1	13758592251	2025-04-06	Medoba1/2-1/2-1/2-1/2, Xi Ning1/2-1/2-1/2-1/2	Medoba1/2-1/2-1/2-1/2，Xi Ning1/2-1/2-1/2-1/2	Medtronic, 3389S, RC	STN		C+			-						90	80	1.7	NA	C+			-						90	60	1.4	NA
		Wu Shunying	2024-12-25	Female	56	PD	24	Huzhou	2020-09-20	Walking lurching forward	Annual follow-up	Yes	Yes	Level 1	15757266676	2025-09-20	Medoba1/4-0-1/4, Teshuda 1-0-1, Clonazepam 0-0-1/2	Medoba1/2 bid，Teshuda1tablets bid，Clonazepam0-0-1/2	Pingchi.1200-40 Lead；SR1101	STN		+		-							110	70	2.7	NA	+		-							110	70	2.8	NA
		Wu Shunying	2024-12-25	Female	56	PD	24	Huzhou	2020-09-20	Walking lurching forward	Annual follow-up	Yes	Yes	Level 1	15757266676	2025-09-20	Medoba1/4-0-1/4, Teshuda 1-0-1, Clonazepam 0-0-1/2	Medoba1/4-0-1/4，Teshuda1-0-1，Clonazepam0-0-1/2	Pingchi.1200-40 Lead；SR1101	STN															+			-						110	70	2.7	NA
		Qian Qinyu	2024-12-30	Female	53	PD	18	Jiangsu	2024-11-07	Trembling, slow, stiff, abnormal movement, fluctuation	Abnormal movement, Fluctuation	Yes	Yes	Level 1	13813666165	2025-11-07	Xi Ning3/4-1/2-1/2, Medoba1/2-1/2-1/2, diphenhydroxysol 1/4-1/4-1/4, Clozapine 0-0-1/4, Vitaminb6 1-1-1	Xi Ning1/2-1/2-1/2，diphenhydroxysol 1/4-1/4-1/4，Clozapine0-0-1/4，Vitaminb6 1-1-1	Pingchi.1200-40 Lead；SR1101	STN		+		-							130	50	3	1133	+			-						130	60	1.3	1353
		Qian Qinyu	2024-12-30	Female	53	PD	18	Jiangsu	2024-11-07	Trembling, slow, stiff, abnormal movement, fluctuation	Abnormal movement, Fluctuation	Yes	Yes	Level 1	13813666165	2025-11-07	Xi Ning3/4-1/2-1/2, Medoba1/2-1/2-1/2, diphenhydroxysol 1/4-1/4-1/4, Clozapine 0-0-1/4, Vitaminb6 1-1-1	Xi Ning1/2-1/2-1/2，diphenhydroxysol 1/4-1/4-1/4，Clozapine0-0-1/4，Vitaminb6 1-1-1	Pingchi.1200-40 Lead；SR1101	STN															+			-						130	60	1.6	1424
		Yang Guoqing	2025-01-01	Male	66	PD	8	Henan	2024-11-28	Slow, stiff, on-off	On-off	Yes	No	Level 2	13603908718	No	Medoba1/2-1/2-1/2-1/2, Xi Ning1/2-1/2-1/2-1/2, Prapexor (0.25mg) 2-2-2	Medoba1/2-1/2-1/2	Medtronic, 3389S, RC	STN		+		-							130	70	2.9	1357	+		-							130	60	1.3	1760
		Zhang Hezhu	2025-01-02	Male	75	PD	7	Anhui	2024-11-27	Tremor, slowness, rigidity, wearing off	Wearing off	Yes	Yes	Level 1	13865129207	2025-11-27	Medoba1/2-1/2-1/2-1/2, Prapexor (0.25mg) 1-1-1, Xi Ning 0-0-0-1/2	Medoba1/4-1/4-1/4，Prapexor1-1-1	Medtronic, 3389S, RC	STN		+		-							150	60	1.3	1476	+		-							150	70	1.7	1863
		Zhang Jianming	2025-01-02	Male	61	PD	8	Shanghai	2024-12-02	Slow, stiff, freezing	Freezing	Yes	No	Level 2	13524738733	No	Medoba 3/4-3/4-3/4-3/4, compound 1/2-1/2-1/2, amantadine 1-0-0, Clozapine 1/4-1/4-1/2, Exelon (1.5mg) 2-0-2	Medoba1/2-1/2-1/2-1/2，Clozapine1/4-1/4-1/2，㓞᠏㍝（1.5mg）2-0-2	Medtronic, 3389S, RC	STN		+	-								130	70	2.3		+	-								130	70	2.4
		Xia Quanxing	2025-01-07	Male	75	PD	11	Shanghai	2024-12-02	-	-	Yes	No	Level 2	13564987621	No	Medoba 1/2-3/4-1/2-3/4, Xi Ning 1/4-1/4-1/4-1/4, Prapexor (0.25mg) 2-2-2-0, trazodone 0-0-0-1, Vitamin B6 1-1-1-1, Quetiapine 0-0-0-1/2	Medoba1/4-1/4-1/4-1/4，Prapexor（0.25mg）2-2-2-0，Vitaminb61-1-1-1，Quetiapine0-0-0-1/2，trazodone0-0-0-1	Medtronic，B33005,B34000,37612(Rechargeable RC)	STN		+			-						130	60	1.2	1830	+			-						130	60	1	2351
		Ni Yafei	2025-01-07	Female	69	PD	7	chekiang	2024-11-29	Abnormal movement, slow, stiff	Dyskinesia	Yes	Yes	Level 1	17757231285	2025-11-29	Medoba 1/2-1/2-1/2-1/2, Prapexor (0.25mg) 1-1-1-1, amantadine 1/2-1/2-1/2-1/2	Medoba1/2-1/2-1/2，amantadine1-1-0	Pinchi，L301 Lead，G106RS	STN		+		-							60	130	1		+	5-								60	130	1.15mA
		Gao Xiaodong	2025-01-08	Male	55	发作性肌张力障碍	8	chekiang	2024-11-24	Left side limb spasm, during walking for forty steps	-	No	No	Level 2	13505895719	No	No	No	Pinchi，L301 Lead，G106RS	Gpi		+			-						105	80	2	1205	+		-							105	120	2	1035
		Zhang Xiaohong	2025-01-08	Female	62	PD	6	Jiangsu	2024-12-05	Slow, stiff, end of the dose, on-off	End of dose, On-off	Yes	Yes	Level 1	13814283500	2025-12-05	Medoba 1/2-1/2-1/2-1/2, Xi Ning 1/2-1/2-1/2-1/2, amantadine 0-1-0, Slaiglan 1-0-0	Medoba1/2-1/2-1/2，amantadine0-1-0，Slaiglan1-0-0	Jing Yu1202-S Lead；SR1103	STN		+					-				130	70	2	1.39	+				-					130	70	2.05	1.36
		Yang Wei	2025-01-08	Male	45	PD	2	Shanghai	-	Tremor, slow	-	Yes	Yes	Level 1	18637055753	2026-01-08	Medoba 1/4-1/4-1/4, Vitamin B6 1-1-1, Teshuda 0-1-0, diphenhydroxysol 1-0-1	Medoba1/4-1/4-1/4，Vitaminb6 1-1-1，Teshuda0-1-0，diphenhydroxysol 1-0-1	-	-
		Li Ming	2025-01-08	Male	39	PD	21	Shanghai	2023-01-16	-	-	Yes	Yes	Level 1	13901924829	2026-01-16	amantadine 1-1-1, diphenhydroxysol 1-1-1, Clonazepam 0-0-0-1/2, Rothigottin (2+4mg) every 48 hours, Ritalin (145mg) 1-1-0	amantadine1-1-1，diphenhydroxysol 1-1-1，Clonazepam0-0-0-1/2，Rothigottin（2+4mg）48h`ᶁ，⚾୺෡（145mg）1-1-0	Pingchi.1200-40 Lead；SR1101	STN		+				-					105	70	2.1		+				-					105	100	2.9
		Li Ming	2025-01-08	Male	39	PD	21	Shanghai	2023-01-16	-	-	Yes	Yes	Level 1	13901924829	2026-01-16	amantadine 1-1-1, diphenhydroxysol 1-1-1, Clonazepam 0-0-0-1/2, Rothigottin (2+4mg) every 48 hours, Ritalin (145mg) 1-1-0	amantadine1-1-1，diphenhydroxysol 1-1-1，Clonazepam0-0-0-1/2，Rothigottin（2+4mg）48h`ᶁ，⚾୺෡（145mg）1-1-0	Pingchi.1200-40 Lead；SR1101	STN		+		-							105	60	1				+	-						105	60	2.6
		Zhang Qin	2025-01-08	Female	75	PD	15	Shanghai	2022-01-24	Dyskinesia	Dyskinesia	Yes	Yes	Level 1	18964959013	2026-01-24	Medoba 1/2-0-0, Xi Ning 1/2-1/2-1, Prapexor (0.75mg) 0-0-1, amantadine 1-1-1-1-0, Clozapine 1/4-1/4-1/2, Vitamin B6 1-1-1	Medoba1/2-0-0，Xi Ning1/2-1/2-1，Prapexor（0.75mg）0-0-1，amantadine1-1-1-1-0，Clozapine1/4-1/4-1/2，Vitaminb6 1-1-1	Pingchi.1200-40 Lead；SR1101	STN
		Yao Xiaoxiang	2025-01-08	Female	70	PD	8	Jiangsu	2024-11-21	On-off, freezing, slow, stiff	On-off, Freezing	Yes	Yes	Level 1	15203123008	2025-11-21	Medoba 1/2-1/2-1/2, Teshuda 1-0-1, diphenhydroxysol 1/2-1/2-1/2, Xi Ning 1/2-1/2-1/2, Kedan 1-0-1, amantadine 0-1-0, Vitamin B6 1-1-1	Medoba1/2-1/2-1/2，Vitaminb6 1-1-1	Pingchi.1200-40 Lead；SR1101	STN		+			3-						130	60	1.3		+			7-						130	60	1.3
		Cheng Zhongjian	2025-01-09	Male	54	PD	5	Jiangxi	2024-12-06	-	-	Yes	No	Level 2	18979313676	No	Medoba1/4-1/4-1/4-1/4, Xi Ning1/2-1/2-1/2-1/2, Kedan1/2-1/2-0-0, Slaiglan1-1-0-0, Prapexor (0.375mg) 1-1-2	Medoba1/4-1/4-1/4-1/4，Xi Ning1/2-1/2-1/2-1/2，Kedan1/2-1/2-0-0，Slaiglan1-1-0-0，Prapexor（0.375mg）1-1-2	Medtronic，B33005,B34000,37612(Rechargeable RC)	STN		C+		1-							130	70	1.6	1771	C+		9-							130	60	1.1	1934
		Cheng Zhongjian	2025-01-09	Male	54	PD	5	Jiangxi	2024-12-06	-	-	Yes	No	Level 2	18979313676	No	Medoba1/4-1/4-1/4-1/4, Xi Ning1/2-1/2-1/2-1/2, Kedan1/2-1/2-0-0, Slaiglan1-1-0-0, Prapexor (0.375mg) 1-1-2	Medoba1/4-1/4-1/4-1/4，Xi Ning1/2-1/2-1/2-1/2，Kedan1/2-1/2-0-0，Slaiglan1-1-0-0，Prapexor（0.375mg）1-1-2	Medtronic，B33005,B34000,37612(Rechargeable RC)	STN		C+		1-							130	70	1.6	1683	C+		9-							130	60	1.2	1721
		Zhou Junli	2025-01-09	Male	45	PD	5	chekiang	2024-12-06	Stiff	-	Yes	No	Level 2	15212365236	No	Medoba1/4-1/4-1/4-1/4, Xi Ning1/2-1/2-1/2-1/2, Kedan1-1-1-1, Resa Gilan1-0-0-0, Senforo (0.25mg) 2-2-2-0, amantadine1-1-0-0	Medoba1/4-1/4-1/4，amantadine1-1-0	Medtronic，B33005,B34000,37612(Rechargeable RC)	STN		+		-							130	60	0.9		+			-						130	60	0.6
		Shen Dexin	2025-01-14	Male	78	DT	10	chekiang	2024-12-05	Dystonic tremor, head and both upper limbs shaking	-	Yes	Yes	Level 1	13362216367	2025-12-05	No	No	Jing Yu1202-S Lead；SR1101	PSA-vo		+	-								140	60	2.2		+	-								130	60	1.2
		Fan Guoyin	2025-01-14	Male	61	PD	12	chekiang	2024-12-04	Stiff, Abnormal movement	Dyskinesia	Yes	No	Level 2	15258150079	No	Medoba3/4-3/4-3/4-3/4, Prapexor (0.25mg) 1-1-1-1, Kedan1/2-1/2-1/2	Medoba3/4-3/4-3/4-3/4，Prapexor（0.25mg）1-1-1-1，Kedan1/2-1/2-1/2	Pinchi，L301 Lead，G106RS	STN		+		-							130	60	1.5	1629	+		-							130	60	1659
		Fan Guoyin	2025-01-14	Male	61	PD	12	chekiang	2024-12-04	Stiff, Abnormal movement	Dyskinesia	Yes	No	Level 2	15258150079	No	Medoba3/4-3/4-3/4-3/4, Prapexor (0.25mg) 1-1-1-1, Kedan1/2-1/2-1/2	Medoba3/4-3/4-3/4-3/4，Prapexor（0.25mg）1-1-1-1，Kedan1/2-1/2-1/2	Pinchi，L301 Lead，G106RS	STN		+		-							130	60	1.2		+		-							130	60	1.2
		Yin Xuemei	2025-01-15	Female	53	Meige	2	Liaoning	2024-12-11	Difficulty opening eyes	-	No	No	Level 2	18641567172	No	No	No	jingyu1200-40 Lead；SR1101	STN		+								-	130	60	1.27		+								-	130	60	1.2	1.44
		Liu Mo Wing*	2025-01-16	Female	70	PD	7	chekiang	2024-12-12	Tremor, slow	-	Yes	Yes	Level 4	18110655180	Never follow-up	Medoba1/4-0-1/4, amantadine1-1-1, Teshuda1-0-1	Medoba1/4-0-1/4，amantadine1-1-1，Teshuda1-0-1	Medtronic, 3389S, RC	STN		+			-						130	60	1.1	1540	+		-							130	60	1.1	1881
		Dong Lansheng	2025-01-16	Male	76	PD	7	Gansu	2024-12-09	Shaking, freezing	Freezing	Yes	No	Level 2	17682329470	No	Medoba1/2-1/2-1/2, Xi Ning1/2-0-1/2, Prapexor (0.75mg) 1/2-1/2-1/2	Medoba 1/2-1/4-1/2，Prapexor（0.25mg）2-2-2	Pingchi.1200-40 Lead；SR1101	STN		+		-							150	60	1.2	1911	+									150	70	1.2	1044
		Dong Lansheng	2025-01-16	Male	76	PD	7	Gansu	2024-12-09	Shaking, freezing	Freezing	Yes	No	Level 2	17682329470	No	Medoba1/2-1/2-1/2, Xi Ning1/2-0-1/2, Prapexor (0.75mg) 1/2-1/2-1/2	Medoba 1/2-1/4-1/2，Prapexor（0.25mg）2-2-2	Pingchi.1200-40 Lead；SR1101	STN		+			-						150	60	1	2163	+				-					150	70	1.5	1044
		Qin xinbing	2025-01-16	Male	46	PD	9	Jiangxi	2024-12-10	-	-	Yes	Yes	Level 1	15306297917	2025-12-10	Medoba1/2-1/2-1/2-1/2, amantadine1-1-0-0, diphenhydroxysol 1-1-0-0, Daringfu1-0-1-0	Medoba1/4-1/4-1/4-1/4，amantadine1-1-0-0，diphenhydroxysol 1-1-0-0	Medtronic，B33005,B34000,37612(Rechargeable RC)	STN		+			-						150	70	1.5				-							150	60	1.7
		Maochun ping	2025-01-21	Male	71	PD	12	Jiangsu	2024-12-12	-	-	Yes	No	Level 2	18961011272	No	Medoba1/4-1/4-1/2, Senforo (0.25mg) 2-2-2, amantadine1-0-1, Resa Gilan1/2-0-1/2, Daringfu1-1-1, Quetiapine0-0-1	Medoba1/2-1/2-1/2，Senforo（0.25mg）2-2-2，amantadine1-0-0	Pinchi，L301 Lead，G106RS	STN		+			-						150	60	1.5		+			-						150	60	1.2
		Zhou Zengwu	2025-01-21	Male	75	PD	12	chekiang	2024-12-13	On-off, stiff	On-off	Yes	No	Level 2	15852718091	No	Medoba3/4-3/4-3/4, Daringfu1/2-1/2-1/2, Puaxo (0.25mg) 5/2-5/2-5/2, amantadine1/2-1/2-0	Medoba1/2-1/2-1/2，Daringfu1/2-1/2-1/2	Pinchi，L301 Lead，G106RS	STN		+									130	60	1.5		+		-							130	60	1.5
		Feng Xianrui	2025-01-22	Female	60	PD	10	Jiangsu	2024-12-12	-	-	Yes	Yes	Level 1	15800590159	2025-12-12	Medoba3/4-3/4-3/4-3/4-3/4, Teshuda1-0-1-0-0, diphenhydroxysol 1/2-0-1/2-0-0	Medoba1/2-1/2-1/2-1/2，diphenhydroxysol 1/2-0-1/2-0	jingyu1200-40 Lead；SR1101	STN		+	-								30	70	1.8		+	-								30	70	1.8
		Feng Xianrui	2025-01-22	Female	60	PD	10	Jiangsu	2024-12-12	-	-	Yes	Yes	Level 1	15800590159	2025-12-12	Medoba3/4-3/4-3/4-3/4-3/4, Teshuda1-0-1-0-0, diphenhydroxysol 1/2-0-1/2-0-0	Medoba1/2-1/2-1/2-1/2，diphenhydroxysol 1/2-0-1/2-0	jingyu1200-40 Lead；SR1101	STN		+				-					130	60	1.75		+				-					140	60	2
		Feng Lianjuan	2025-01-22	Female	69	PD	10	chekiang	2024-12-19	Tremor of head and limbs, poor balance	-	No	No	Level 2	15305732861	No	Primidone 1-1-1, topiramate 1-0-1, Estazolam 0-0-0-1, pravastatin sodium 0-0-0-1	Estazolam 0-0-0-1, pravastatin sodium 0-0-0-1	jingyu1200-40 Lead；SR1101	VIM-PSA		+	-								160	70	1.4	1.45	+	-								160	70	1.5	1.34
		Hang Yongquan	2025-01-23	Male	57	PD	10	Jiangsu	2024-12-17	Tremor, slow, stiff	-	Yes	No	Level 2	13773749813	No	Medoba1-1-1, Prapexor (0.25mg) 1-0-1, amantadine1-1-1-0	Medoba1/2-1/2-1/2，Prapexor（0.25mg）1-0-1，amantadine1-1-1-0	Pinchi，L301 Lead，G106RS	STN		+			-						140	70	1.5		+			-						140	60	1.5
		Chen Genyou	2025-01-23	Male	78	PD	10	chekiang	2024-12-19	-	-	Yes	Yes	Level 1	13967941250	2025-12-19	Medoba1/2-1/2-1/2, Piribedil0-0-1, Xi Ning1/2-1/2-1/2	Medoba1/2-1/2-1/2，Piribedil0-0-1	Medtronic，B33005,B34000,37612(Rechargeable RC)	STN	monopole	C+			2-						130	60	1.2	1623	C+			-						130	60	1.2	1957
		Luo Gaoyi	2025-01-23	Male	62	痉挛性斜颈	5	chekiang	2024-12-13	Involuntary neck rotation	-	No	No	Level 2	13645704085	No	Clonazepam (0.5mg) 0-0-0-6, Melatonin3/2-0-0	Clonazepam（0.5mg）0-0-0-6，Melatonin3/2-0-0	Pinchi，L301 Lead，G106RS	STN		+			-						130	60	1.5	726	+			-						130	60	1.5	1336
		Zhou Shijie						Fujian							13505001147
		Sun Guokun	2025-02-05	Male	70	PD	4	Shanghai	2024-12-26	-	-	Yes	No	Level 2	15601665773	No	Medoba1/2-1/2-1/2, Prapexor (0.25mg) 1-1-1, Vitaminb6 1-1-1	Prapexor（0.25mg）1-1-1	Medtronic，B33005,B34000,37612(Rechargeable RC)	STN		+			-						130	60	0.8		+			-						130	60	0.9
		Qin Xiangfu	2025-02-05	Male	44	Dystonia	2	Anhui	2024-12-27	Difficulty opening mouth, neck tilted to the right	-	Yes	Yes	Level 1	15956659380	2025-12-27	Aripiprazole (5mg) 1-0-0-1, Baclofen1-0-1, Oxcarbazepine (150mg) 1-0-1, diphenhydroxysol 1-0-1, Clonazepam0-0-1	Aripiprazole（5mg）1-0-0-1，Baclofen1-0-1，Oxcarbazepine（150mg）1-0-1，diphenhydroxysol 1-0-1，Clonazepam0-0-1	Pingchi.1200-40 Lead；SR1101	Gpi		+	-								130	110	1.6	1237	+	-								130	110	1.6	1268
		Shi Kejin	2025-02-05	Female	69	PD	12	chekiang	2024-12-25	Freezing, slow, stiff, on-off, abnormal movement, hallucinations	Freezing, Switching, Abnormal movement, Hallucination	Yes	No	Level 2	13306840094	No	Medoba1/2-1/2-1/2-1/2-1/2, Xi Ning1/2-0-1/2, amantadine2-0-0, Teshuda1-0-0	Medoba1/2-1/2-1/2，amantadine1-1-0	Medtronic, 3389S, RC	STN		+			-						130	80	1.2		+			-						130	80	1.3
		Wang jing	2025-02-06	Female	65	PD	8	Heilongjiang	2024-12-23	Stiffness, shaking, unbalanced	-	Yes	No	Level 2	15945818289	No	Medoba3/4-3/4-3/4-3/4, Xi Ning0-0-0-1/2, Prapexor (0.25mg) 1-1-1-0, Vitaminb6 1-1-1-1	Medoba1/4-0-0，Xi Ning0-0-0-1/2	Pingchi.1200-40 Lead；SR1101	STN				-							130	60	1.1											130	60	1.4
		Wang Yuanyue	2025-02-06	Female	35	Dystonia	34	chekiang	2024-12-30	Neck tilted to the right, slurred speech, hand flapping	-	No	No	Level 2	15068716646	No	Medoba1/2-1/2-1/2	Medoba1/2-1/2-1/2，diphenhydroxysol 1/2-1/2-1/2，Baclofen1-1-1	Pinchi，L301 Lead，G106RS	Gpi		+	-								130	100	1.6	948	+	-								130	120	1.9	866
		Huang Xiaolin	2025-02-10	Female	61	PD	9	Fujian	2025-01-03	Slow, stiff, freezing, difficulty swallowing	Freezing	Yes	Yes	Level 1	13761582392	2026-01-03	Medoba1/2-1/2-1/2, Xi Ning1/2-1/2-1/2, amantadine1-1-1, diphenhydroxysol 1/2-1/2-1/2, Vitaminb6 1-1-1, Senforo (0.75mg) 1-0-1	Medoba1/4-1/4-1/4，amantadine1/2-1/2-0，Vitaminb6 1-1-1，diphenhydroxysol 1/2-0-1/2	Medtronic, 3389S, RC	STN		+			-						125	70	1.6		+		-							125	70	1.5
		Pan Aizhen	2025-02-10	Female	71	Meige	2.5	Jiangsu	2025-01-03	-	-	No	No	Level 2	15006140343	No	Clonazepam0-0-0-1	Clonazepam0-0-0-1	Medtronic, 3389S, RC	STN		+				-					140	70	1.5	1215	+				-					140	70	1.5	1220
		Tang Wen	2025-02-11	Male	68	PD	8	Jiangsu	2025-01-08	On-off, dyskinesia	On-off, Dyskinesia	Yes	No	Level 2	13805116618	No	Medoba1/4-1/4-1/4-1/4-1/4-1/4-1/4-1/4, Senforo (0.25mg) 1-0-1, Daringfu 1-0-1, Xi Ning 0-0-0-1, Senforo (0.75mg) 0-0-0-1	Medoba1/2-1/2-1/2-1/2，Vitaminb6 1-1-1	Medtronic，B33005,B34000,37612(Rechargeable RC)	STN		+			-						130	60	1.4	2120	+		-							130	60	1.4	1985
		Wu Jinnan	2025-02-11	Male	64	PD	8	Jiangsu	2025-01-09	-	-	Yes	Yes	Level 1	13706261218	2026-01-09	Medoba 1-1-1, Kedan 1/2-1/2-1/2, Prapexor (0.75mg) 0-0-1, diphenhydroxysol 1/2-0-0	Medoba1/2-1/2-1/2，diphenhydroxysol 1/2-0-0	Medtronic，B33005,B34000,37612(Rechargeable RC)	STN		+			-						130	60	2.1	1390	+			-						130	60	1.8	1272
		Peng Anping	2025-02-12	Female	55	Meige	1	Anhui	2025-01-10	-	-	No	No	Level 2	13805510650	No	No	No	Medtronic，B33005,B34000,37612(RechargeablePPC)	Gpi		+			2a						145	60	1.2	2984	+			10b						145	60	1.2	3413
		Xu Hui	2025-02-12	Female	69	PD	11	Anhui	2024-12-31	Shaking, rigidity, abnormal movement	Dyskinesia	Yes	Yes	Level 1	13855013041	2025/12//31	Medoba 1/2-1/2-1/2-1/2, Xi Ning 1/2-1/2-1/2-1/2, diphenhydroxysol 1/2-0-1/2-0, Senforo (0.25mg) 1-1-1-1, amantadine 1-1-0-0, Vitaminb6 1-1-1-1	Medoba1/2-1/2-1/2，diphenhydroxysol 1/2-0-1/2，Vitaminb6 1-1-1，amantadine1/2-1/2-0，Senforo（0.25mg）1-1-1	Pinchi，L301 Lead，G106RS	STN		+		-							130	60	1.5	1066	+			-						130	60	1.2	1801
		Angsheng River	2025-02-12	Male	67	PD	9	Jinhua	2023-02-20	Stiff all over	-	Yes	Yes	Level 1	13868998010	2026-02-20	Rivalatine Ting Capsule (1.5mg) 0-0-0-1, Medoba 1/4-1/2-1/4-1/2, Prapexor (0.25mg) 1-0-0-0, Xi Ning 1/2-0-1/2-0, oxalate escitalopram (10mg) 1-0-0-0, Clozapine 0-0-0-1/2	Medoba1/4-1/2-1/4-1/2，Xi Ning1/2-0-1/2-0，Prapexor（0.25mg）1-0-0	Pingchi.1200-40 Lead；SR1101	STN	monopole	C+				4-					140	70	2.3	893	C+				8-					140	60	2.4	896
		Zhu Congsheng	2025-02-12	Male	58	PD	7	Jiangsu	2024-02-29	Slow, stiff	-	Yes	Yes	Level 1	15851725185	2026/2/29	Medoba 1/2-1/2-1/2	Medoba1/4-1/4-1/4	Pinchi，L301 Lead，G106RS	STN		+			-						130	60	1.2	966	+			-						130	70	2.2	433
		Huangchuan	2025-02-13	Male	51	PD	7	Jiangsu	2025-01-02	Shaking, slow, stiff, difficulty starting, propulsion	-	Yes	Yes	Level 1	13951127529	2026-01-02	Medoba 1/2-1/2-1/2, Vitaminb6 1-1-1, Prapexor (0.25mg) 1-1-1, Xi Ning 1/2-1/2-1/2, Duloxetine 2-0-0, Levetiracetam 1-0-1, diphenhydroxysol 1-0-1, Clonazepam 0-0-0-1, Kedan 0-0-0-1	Medoba1/4-1/4-1/4，Prapexor1-1-1，diphenhydroxysol 1/2-0-1/2，Vitaminb6 1-1-1，Duloxetine2-0-0，Clonazepam0-0-0-1	Pinchi，L301 Lead，G106RS	STN		+		-							130	60	1.5		+		-							130	60	1.7
		Huangchuan	2025-02-13	Male	52	PD	8	Jiangsu	2025-01-02	Shaking, slow, stiff, difficulty starting, propulsion	-	Yes	Yes	Level 1	13951127529	2026-01-02	Medoba 1/2-1/2-1/2, Vitaminb6 1-1-1, Prapexor (0.25mg) 1-1-1, Xi Ning 1/2-1/2-1/2, Duloxetine 2-0-0, Levetiracetam 1-0-1, diphenhydroxysol 1-0-1, Clonazepam 0-0-0-1, Kedan 0-0-0-1	Medoba1/4-1/4-1/4，Prapexor1-1-1，diphenhydroxysol 1/2-0-1/2，Vitaminb6 1-1-1，Duloxetine2-0-0，Clonazepam0-0-0-1	Pinchi，L301 Lead，G106RS	STN		+				-					130	60	1.9		+				-					130	60	2
		Chen Lijuan	2025-02-13	Female	67	PD	9	Jiangsu	2025-01-06	Tremor, slow, stiff	-	No	No	Level 2	18961672848	No	Xi Ning 1-1-1-1, Medoba 1/2-1/2-1/2-1/2, Vitaminb6 1-1-1-1, Teshuda 0-1-0-0, Clozapine 0-0-0-1	Medoba1/4-1/4-1/4-1/4，Vitaminb6 1-1-1-1，Clozapine1/4-0-0-1/2	Pinchi，L301 Lead，G106RS	STN		+			-						130	60	0.8	1858	+			-						130	60	1.6	1243
		Yan Chuanfeng
		Liu Kaiyu	2025-02-17	Male	58	PD	7	Hubei	2025-01-16	Slow, stiff, fluctuating	Fluctuation	Yes	No	Level 2	13697266790	No	Xi Ning1-0-1-0, Medoba0-1/4-0-1/4, Prapexor (0.25mg) 1-1-1-1, Daringfu0-1/2-0-1/2, trazodone 0-0-0-1	Medoba1/2-1/2-1/2，Vitaminb6 1-1-1，trazodone0-0-1	Medtronic，B33005,B34000,37612(Rechargeable RC)	STN		+		-							120	60	1.7	1962	+		-							120	60	1.6	1689
		Chen Guoqiang	2025-02-18	Male	52	PD	4	Jiangsu	2025-01-13	Slow	-	Yes	No	Level 2	13605264597	No	Medoba 1/2-1/2-1/2-1/2, Vitaminb6 1-1-1-1, amantadine 1-1-0-0, Prapexor (0.25mg) 1-1-1-0, Daringfu 1/2-0-0-1/2	Medoba1/4-1/4-1/4，Vitaminb6 1-1-1，Prapexor（0.25mg）1-1-1	Pinchi，L301 Lead，G106RS	STN		+		-							130	60	1.5	1471	+		-							130	60	0.6	2005
		Lu Xianyu	2025-02-18	Male	61	PD	8	chekiang	2025-01-15	-	-	Yes	Yes	Level 1	13819677674	2026-01-15	Medoba 1/2-1/2-1/2, Xi Ning 1/2-0-1/2, Clozapine 0-0-1/2, diphenhydroxysol 1/2-1/2-1/2	Medoba1/2-1/2-1/2，Clozapine0-0-1/2，diphenhydroxysol 1/2-1/2-1/2	Pinchi，L301 Lead，G106RS	STN		+			-						160	70	1.5		+			-						160	70	1.6
		Xu Hanqiu	2025-02-19	Male	77	PD	7	Jiangsu	2023-12-26	Shaking, difficulty turning, difficulty starting	-	Yes	Yes	Level 1	13063663321	2025-12-26	Xi Ning 0-0-0-1/2	Xi Ning0-0-0-1/2	Pingchi.1200-40 Lead；SR1101	STN		+		-							125	70	1.85	920	+		-							125	60	2.55	813
		Xu Hanqiu	2025-02-19	Male	77	PD	7	Jiangsu	2023-12-26	Shaking, difficulty turning, difficulty starting	-	Yes	Yes	Level 1	13063663321	2025-12-26	Xi Ning 0-0-0-1/2	Xi Ning0-0-0-1/2	Pingchi.1200-40 Lead；SR1101	STN		+				-					125	60	2.05	962	+			-	-					125	50	2.8	631
		Yang Liyan
